# Supplementary material for: Rhodium-catalyzed double hydroboration of pyridine: the origin of the chemo- and regioselectivities
Source: Royal Society of Chemistry journal article supplement (doi:10.1039/d3cy00347g), 2023-01-01
Supplement: d3cy00347g1.pdf [file d3cy00347g1.pdf]

## *Supporting Information*

# **Rhodium-Catalyzed Double Hydroboration of Pyridine: The Origin of the Chemo- and Regioselectivities**

Hyoju Choi,<sup>§ab</sup> Ruibin Wang,<sup>§c</sup> Suyeon Kim,<sup>ab</sup> Dongwook Kim,<sup>ba</sup> Mu-Hyun Baik,<sup>\*ba</sup> and Sehoon Park<sup>\*cd</sup>

[a] Department of Chemistry, Korea Advanced Institute of Science & Technology (KAIST),  
Daejeon 305-701, South Korea

[b] Center for Catalytic Hydrocarbon Functionalizations, Institute for Basic Science (IBS),  
Daejeon 305-701, South Korea

[c] Department of Chemistry, Guangdong-Technion Israel Institute of Technology, Shantou, Guangdong 515063, China;

[d] Technion-Israel Institute of Technology, Technion City, 32000 Haifa, Israel

(<sup>§</sup>H.C. and R.W. equally contributed to this study.)

### **Corresponding Authors**

\*E-mail: Mu-Hyun Baik [mbaik2805@kaist.ac.kr](mailto:mbaik2805@kaist.ac.kr) and Sehoon Park [sehoon.park@gtit.edu.cn](mailto:sehoon.park@gtit.edu.cn)

|                                                                                                                |        |
|----------------------------------------------------------------------------------------------------------------|--------|
| I. General Considerations .....                                                                                | S3     |
| II. General Procedure: Rh-Catalyzed Double Hydroboration of Pyridine (Table 1).....                            | S3-4   |
| III. <sup>1</sup> H NMR for Entry 1 in Table 1 (Crude yields of A, B, G, and R).....                           | S4-5   |
| IV. Full NMR Assignments of G and R (Table S1, entry 10) .....                                                 | S6-9   |
| V. Generation of G' and R' (Table 1, entry 3).....                                                             | S9-12  |
| VI. Mechanistic Experiments (Fig. 1 and 2) .....                                                               | S13-17 |
| VI -1. <sup>1</sup> H NMR monitoring of the catalytic reaction (Fig. 1).....                                   | S13-14 |
| VI -2. <sup>31</sup> P{ <sup>1</sup> H} NMR monitoring of the catalytic reaction (Fig. 1).....                 | S14    |
| VI -3. Variable-temperature <sup>1</sup> H NMR of the catalytic solution (Fig. 1).....                         | S15    |
| VI -4. <sup>1</sup> H- <sup>31</sup> P two-dimensional correlation NMR of the catalytic solution (Fig. 1)..... | S15    |
| VI -5. MALDI-TOF Mass analysis of the catalytic solution (Fig. 1) .....                                        | S16    |
| VI -6. <sup>1</sup> H NMR monitoring of the stoichiometric reaction (Fig. 2a-b) .....                          | S16-17 |
| VI -7. <sup>31</sup> P{ <sup>1</sup> H} NMR monitoring of the stoichiometric reaction (Fig. 2c-d) .....        | S17    |
| VII. Density Functional Theory (DFT) Calculations .....                                                        | S18-68 |
| VII-1. Computational details .....                                                                             | S18    |
| VII-2. Inner-sphere pathway from 1b .....                                                                      | S18-19 |
| VII-3. Reductive elimination from 3 without dissociating pyridine .....                                        | S20    |
| VII-4. Detailed analysis on regioselective reductive elimination in the 1st-hydroboration .....                | S20-21 |
| VII-5. Detailed analysis on regioselective reductive elimination in the 2 <sup>nd</sup> -hydroboration .....   | S21-23 |
| VII-6. Consideration of the rhodaboration pathway for 1,2-dihydropyridine .....                                | S23    |
| VII-7. Hydroboration of N-boryl-1,4-dihydropyridine .....                                                      | S24    |
| VII-8. Cartesian coordinates of DFT-optimized structures .....                                                 | S25-53 |
| VII-9. Vibrational frequencies of DFT-optimized structures .....                                               | S53-66 |
| VII-10. Energy components of DFT-optimized structures.....                                                     | S67-68 |
| VIII. References .....                                                                                         | S69-70 |
| X. Appendix I.....                                                                                             | S71    |
| X-Ray crystallographic data for G' and R' .....                                                                | S72-98 |

## I. General Considerations

Unless otherwise stated, all catalytic reactions were carried out in J-Young NMR tubes in a nitrogen-filled 'Mbraun' glovebox with a medium capacity recirculator (0.1–1 ppm of O<sub>2</sub>). Benzene-d<sub>6</sub> and chloroform-d<sub>1</sub> purchased from Cambridge Isotope Laboratories, Inc. and benzene-d<sub>6</sub> were predried by 4 Å molecular sieves for the catalytic double hydroboration and mechanistic studies. All other commercial reagents from standard suppliers (Sigma Aldrich, Acros, Alfa Aesar, Macklin) were directly used as received without further purification unless otherwise stated. Analytical thin layer chromatography (TLC) was performed on pre-coated silica gel 60 F254 plates. Visualization on TLC was achieved by the use of UV light (254 nm), exposure to treatment with acidic anisaldehyde, phosphomolybdic acid, ninhydrin or ceric ammonium molybdate stain followed by heating. Column chromatography was undertaken on silica gel (300–400 mesh) using a proper eluent. <sup>1</sup>H NMR was recorded on Bruker Ascend-400 (400 MHz) for routine characterization of compounds and mechanistic studies. <sup>1</sup>H Chemical shifts were quoted in parts per million (ppm) referenced to the appropriate solvent peak (CHCl<sub>3</sub> in CDCl<sub>3</sub>: 7.26 ppm; C<sub>6</sub>H<sub>6</sub> in C<sub>6</sub>D<sub>6</sub>: 7.16 ppm). The following abbreviations were used to describe peak splitting patterns when appropriate in <sup>1</sup>H NMR: br = broad, s = singlet, d = doublet, t = triplet, q = quartet, p = pentet, dd = doublet of doublet, td = triplet of doublet, ddd = doublet of doublet of doublet, m = multiplet. Coupling constants, J, were reported in hertz unit (Hz). <sup>13</sup>C{<sup>1</sup>H} NMR was recorded on Bruker Ascend-400 (101 MHz) and fully decoupled by broad band proton decoupling. Chemical shifts were reported in ppm referenced to the center of a multiplet at 77.16 ppm of CDCl<sub>3</sub>. <sup>31</sup>P{<sup>1</sup>H} NMR was recorded on Bruker Ascend-400 (162 MHz), while the chemical shifts were reported in ppm referenced to external H<sub>3</sub>PO<sub>4</sub> at 0 ppm. <sup>11</sup>B{<sup>1</sup>H} NMR was recorded on Bruker Ascend-400 (128 MHz), and its chemical shifts were reported in ppm referenced to external BF<sub>3</sub>-OEt<sub>2</sub> at 0 ppm. Mass spectra were obtained by using Bruker MALDI-TOF and/or Shimadzu GC mass spectrometers.

## II. General Procedure: Rh-Catalyzed Double Hydroboration of Pyridine (Table 1)

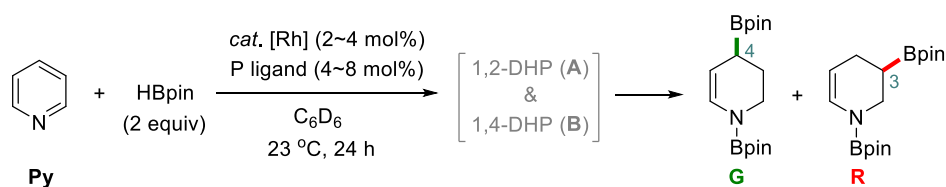

### General procedure for double hydroboration of pyridine:

In glove box, HBpin (0.8 mmol, 2 equiv) was added to a solution of a Rh precatalyst (0.008–0.016 mmol, 2–4 mol%) and phosphine ligand (0.016–0.032 mmol, 4–8 mol%) in deuterated benzene (0.5 mL) in a 5 mL screw-cap vial. After shaking briefly, pyridine (0.4 mmol) was added to the above solution, and the whole mixture solution was carefully then transferred to a medium-walled J. Young NMR tube to conduct the catalytic reaction at 23 °C for 24 h. At the end of the catalytic reaction, an internal standard 1,3,5-trimethoxybenzene (0.1 mmol) was added in order to calculate the crude <sup>1</sup>H NMR yields.

**Table S1.** Variable reaction conditions for the Rh-catalyzed double hydroboration of pyridine.<sup>a</sup>

| entry             | cat. [Rh] (mol%)                          | P ligand (mol%)                                                                | conv. (%)           | yield (%) <sup>b</sup> |                 |                 |                 |
|-------------------|-------------------------------------------|--------------------------------------------------------------------------------|---------------------|------------------------|-----------------|-----------------|-----------------|
|                   |                                           |                                                                                |                     | A                      | B               | G               | R               |
| 1                 | [Rh(cod)Cl] <sub>2</sub> (2)              | PPh <sub>3</sub> (4)                                                           | quant.              | <1                     | 21              | 50              | 11              |
|                   |                                           |                                                                                |                     | <1 <sup>c</sup>        | 20 <sup>c</sup> | 51 <sup>c</sup> | 12 <sup>c</sup> |
| 2                 | [Rh(cod)Cl] <sub>2</sub> (2)              | PPh <sub>3</sub> (8)                                                           | 97                  | <1                     | 6               | 75              | 16              |
| 3 <sup>d</sup>    | [Rh(cod)Cl] <sub>2</sub> (2)              | P( <i>p</i> -CF <sub>3</sub> -C <sub>6</sub> H <sub>4</sub> ) <sub>3</sub> (8) | 92                  | <1                     | 2               | 41              | 47              |
| 4                 | [Rh(cod)Cl] <sub>2</sub> (2)              | P( <i>p</i> -OMe-C <sub>6</sub> H <sub>4</sub> ) <sub>3</sub> (8)              | 81                  | <1                     | 14              | 37              | 26              |
| 5                 | [Rh(cod)Cl] <sub>2</sub> (2)              | P( <i>o</i> -OMe-C <sub>6</sub> H <sub>4</sub> ) <sub>3</sub> (8)              | 79                  | 2                      | 7               | 15              | 37              |
| 6                 | [Rh(cod)Cl] <sub>2</sub> (2)              | PPh <sub>2</sub> Cy (8)                                                        | quant.              | <1                     | 25              | 40              | 25              |
| 7 <sup>e</sup>    | [Rh(cod)Cl] <sub>2</sub> (2)              | PCy <sub>3</sub> (8)                                                           | 68                  | 18                     | 9               | 17              | 18              |
| 8                 | Rh(PPh <sub>3</sub> ) <sub>3</sub> Cl (4) |                                                                                | 70                  | <1                     | 5               | 44              | 20              |
| 9                 | [Rh(cod) <sub>2</sub> ]OTf (4)            | PPh <sub>3</sub> (8)                                                           | 93                  | <1                     | 3               | 50              | 25              |
| 10 <sup>f</sup>   | [Rh(cod) <sub>2</sub> ]OTf (2)            | PPh <sub>3</sub> (8)                                                           | quant.              | <1                     | 3               | 50              | 47              |
| 11 <sup>e,f</sup> | [Rh(cod)Cl] <sub>2</sub> (2)              | PPh <sub>3</sub> (8)                                                           | quant.              | <1                     | 12              | 47              | 36              |
| 12 <sup>e</sup>   | [Rh(cod)Cl] <sub>2</sub> (2)              | PPh <sub>3</sub> (4)                                                           | 42 <sup>g</sup>     | <1 <sup>g</sup>        | 15 <sup>g</sup> | 25 <sup>g</sup> | 2 <sup>g</sup>  |
|                   |                                           |                                                                                | quant. <sup>h</sup> | <1 <sup>h</sup>        | 43 <sup>h</sup> | 42 <sup>h</sup> | 12 <sup>h</sup> |
|                   |                                           |                                                                                |                     | <1 <sup>i</sup>        | 43 <sup>i</sup> | 43 <sup>i</sup> | 13 <sup>i</sup> |
|                   |                                           |                                                                                |                     | <1                     | 39              | 42              | 13              |

<sup>a</sup>Pyridine (0.4 mmol, 1 equiv), HBpin (0.8 mmol, 2 equiv), cat. [Rh] (2~4 mol%), and P ligand (4~8 mol%) in C<sub>6</sub>D<sub>6</sub> (0.5 mL) at 23 °C for 24 h unless otherwise specified. <sup>b</sup>Determined by crude <sup>1</sup>H NMR based on an internal standard 1,3,5-trimethoxybenzene (0.1 mmol). <sup>c</sup>Crude yields after another 8 h-reaction with additional HBpin (1 equiv). <sup>d</sup>22% of the piperidin-N-tosyl-2-imine bearing a C(sp<sup>3</sup>)-B bond in the 4 (**G'**) or 3 (**R'**) position was obtained as a mixture upon the reaction with TsN<sub>3</sub> following the Rh catalysis in one-pot. <sup>e</sup>3 equivalents of HBpin applied. <sup>f</sup>At 50 °C. Crude yields in 4 h<sup>g</sup>, 10 h<sup>h</sup>, and 16 h<sup>i</sup>.

### III. <sup>1</sup>H NMR for Entry 1 in Table 1 (Crude yields of A, B, G, and R)

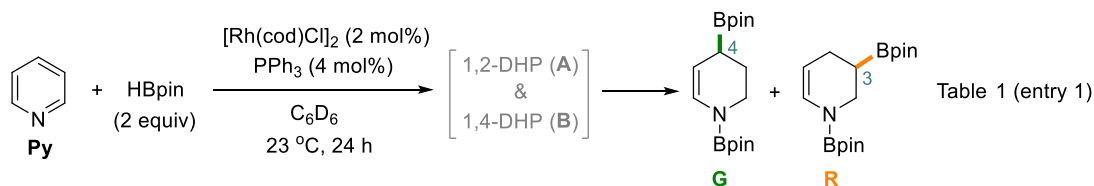

In glove box, HBpin (0.8 mmol, 2 equiv) was added to a solution of bis(1,5-cyclooctadiene)-dirhodium(I) dichloride (0.008 mmol, 2 mol%) and triphenylphosphine (0.016 mmol, 4 mol%) in deuterated benzene (0.5 mL) in a 5 mL screw-cap vial. After shaking briefly, pyridine (0.4 mmol) was added to the above solution, and the whole mixture solution was carefully transferred to a medium-walled J. Young NMR tube to conduct the catalytic reaction at 23 °C for 24 h. At the end of the catalytic reaction, an internal standard 1,3,5-

trimethoxybenzene (0.1 mmol) was added to calculate the crude  $^1\text{H}$  NMR yields of **1,2-DHP** (<1%), **1,4-DHP** (21%), **G** (50%), and **R** (11%). After measuring the  $^1\text{H}$  NMR, another HBpin (0.4 mmol, 1equiv) was added into the catalytic reaction mixture to react at 23 °C for another 8 h. Then, the crude  $^1\text{H}$  NMR yields of each products were determined on the basis of the internal standard: **1,2-DHP** (<1%), **1,4-DHP** (20%), **G** (51%), and **R** (12%).

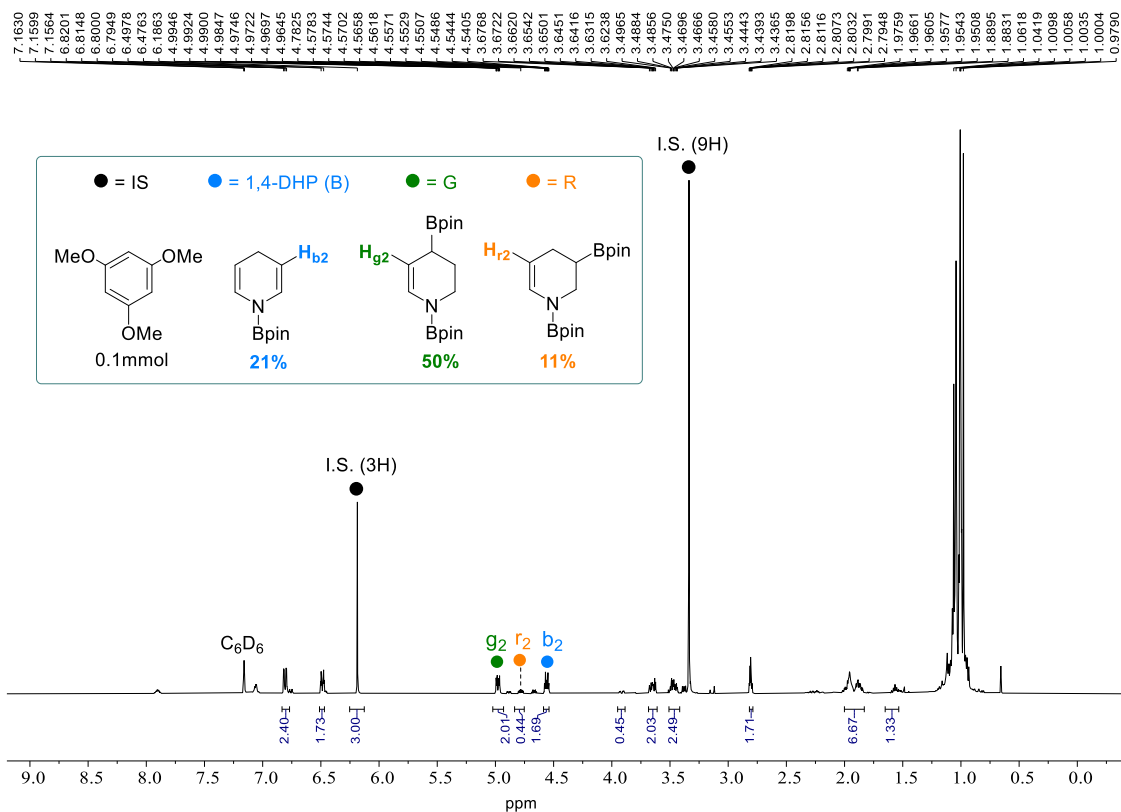

Fig. S1  $^1\text{H}$  NMR spectrum of the crude reaction mixture for entry 1 in Table 1.

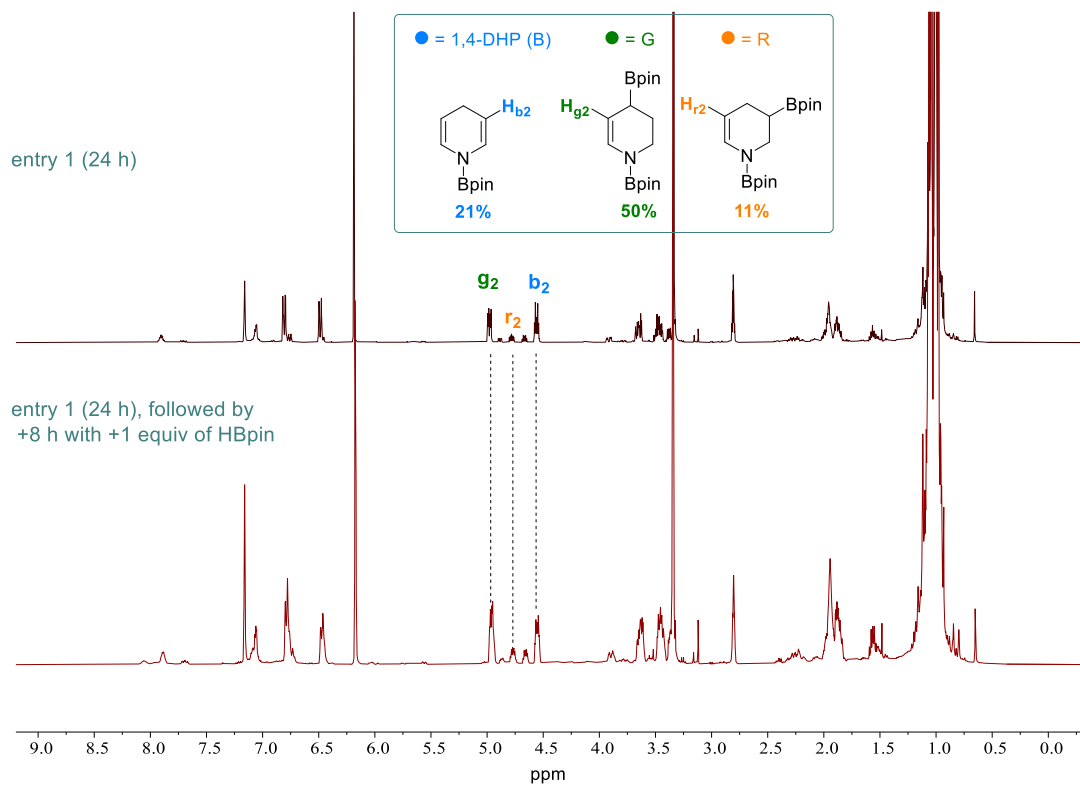

Fig. S2 Overlay of two  $^1\text{H}$  NMR spectra for entry 1 in Table 1.

#### IV. Full NMR Assignments of G and R (Table S1, entry 10)

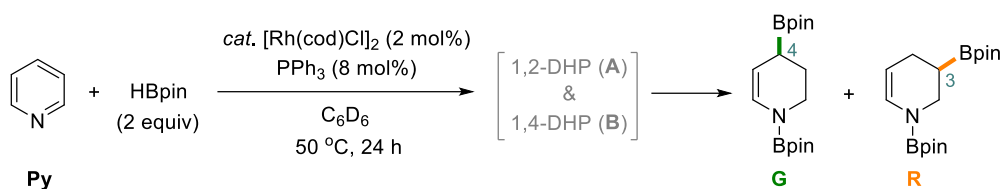

In glove box, HBpin (0.8 mmol, 2 equiv) was added to a solution of bis(1,5-cyclooctadiene)-dirhodium(I) dichloride (0.008 mmol, 2 mol%) and triphenylphosphine (0.032 mmol, 8 mol%) in deuterated benzene (0.5 mL) in a 5 mL screw-cap vial. After shaking briefly, pyridine (0.4 mmol) was added to the above solution, and the whole mixture solution was carefully transferred to a medium-walled J. Young NMR tube to conduct the catalytic reaction at 50 °C for 24 h. At the end of the reaction, an internal standard 1,3,5-trimethoxybenzene (0.1 mmol) was added to directly calculate the crude  $^1\text{H}$  NMR yields of reduction products. The mass of **G/R** from the crude mixture was confirmed by both Bruker MALDI-TOF and Shimadzu GC mass spectrometers. **MALDI-TOF**: Calculated for  $\text{C}_{17}\text{H}_{32}\text{B}_2\text{NO}_4$   $[\text{M}+\text{H}]^+$ : 336.2517, Found: 336.0582. **GC-MS (EI mode)**: Calculated for  $\text{C}_{17}\text{H}_{31}\text{B}_2\text{NO}_4$   $[\text{M}]^+$ : 335.2439, Found: 335.2500.

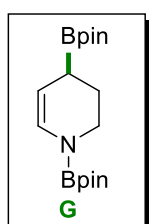

Crude yield: 50%;  $^1\text{H}$  NMR (400 MHz,  $\text{C}_6\text{D}_6$ )  $\delta$  6.71 (d,  $J = 8.1$  Hz, 1H), 4.90 (dd,  $J = 8.1, 3.3$  Hz, 1H), 3.68 – 3.50 (m, 1H), 3.48 – 3.22 (m, 1H), 1.96 – 1.81 (m, 3H), 1.12 – 0.91 (m, 24H);  $^{13}\text{C}\{^1\text{H}\}$  NMR (101 MHz,  $\text{C}_6\text{D}_6$ )  $\delta$  128.82, 102.01, 82.67, 43.46, 24.69, 24.17, 18.53;  $^{11}\text{B}$  NMR (128 MHz,  $\text{C}_6\text{D}_6$ )  $\delta$  33.67, 23.79.

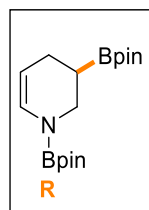

Crude yield: 47%;  $^1\text{H}$  NMR (400 MHz,  $\text{C}_6\text{D}_6$ )  $\delta$  6.71 (d,  $J = 8.1$  Hz, 1H), 4.73 (ddd,  $J = 7.9, 4.6, 3.0$  Hz, 1H), 3.83 (ddd,  $J = 12.4, 3.4, 1.3$  Hz, 1H), 3.50 – 3.18 (m, 1H), 2.34 – 2.09 (m, 2H), 1.57 – 1.30 (m, 1H), 1.12 – 0.91 (m, 24H);  $^{13}\text{C}\{^1\text{H}\}$  NMR (101 MHz,  $\text{C}_6\text{D}_6$ )  $\delta$  128.82, 101.88, 82.67, 41.93, 24.69, 23.68, 18.59;  $^{11}\text{B}$  NMR (128 MHz,  $\text{C}_6\text{D}_6$ )  $\delta$  33.67, 23.79.

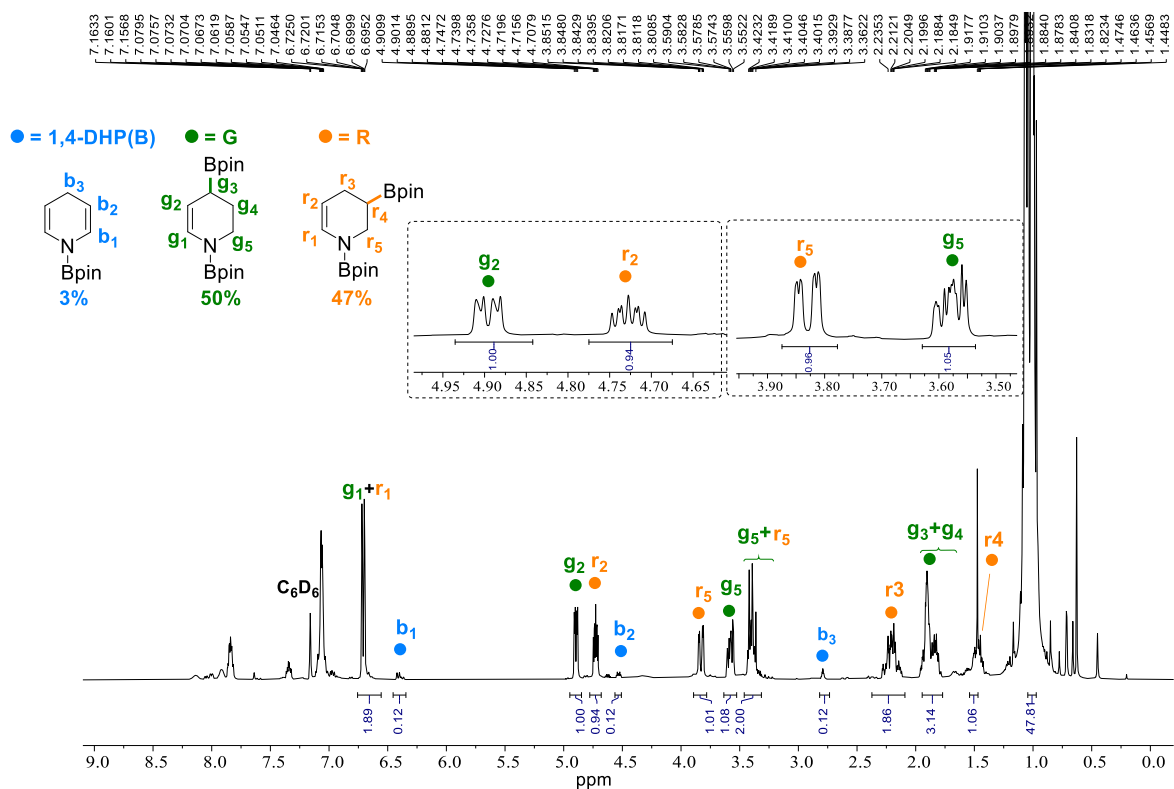

Fig. S3 <sup>1</sup>H NMR spectrum of the crude reaction mixture for entry 10 in Table S1.

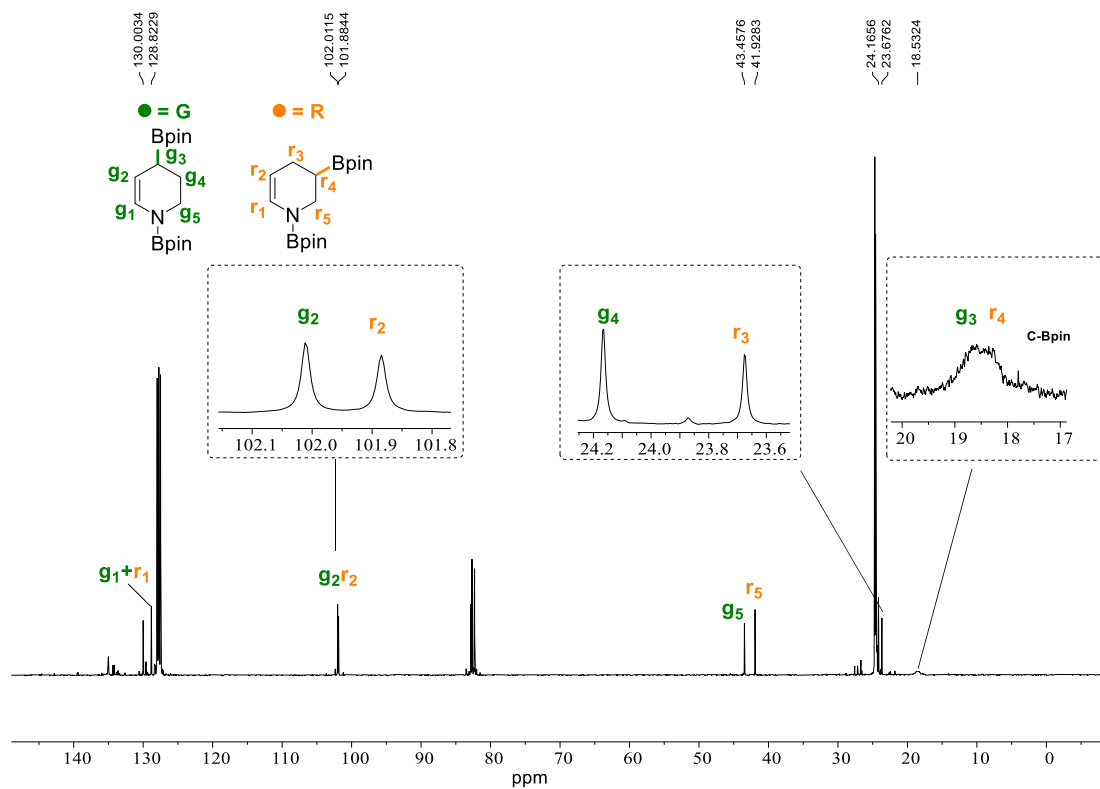

Fig. S4 <sup>13</sup>C{<sup>1</sup>H} NMR spectrum of the crude reaction mixture for entry 10 in Table S1.

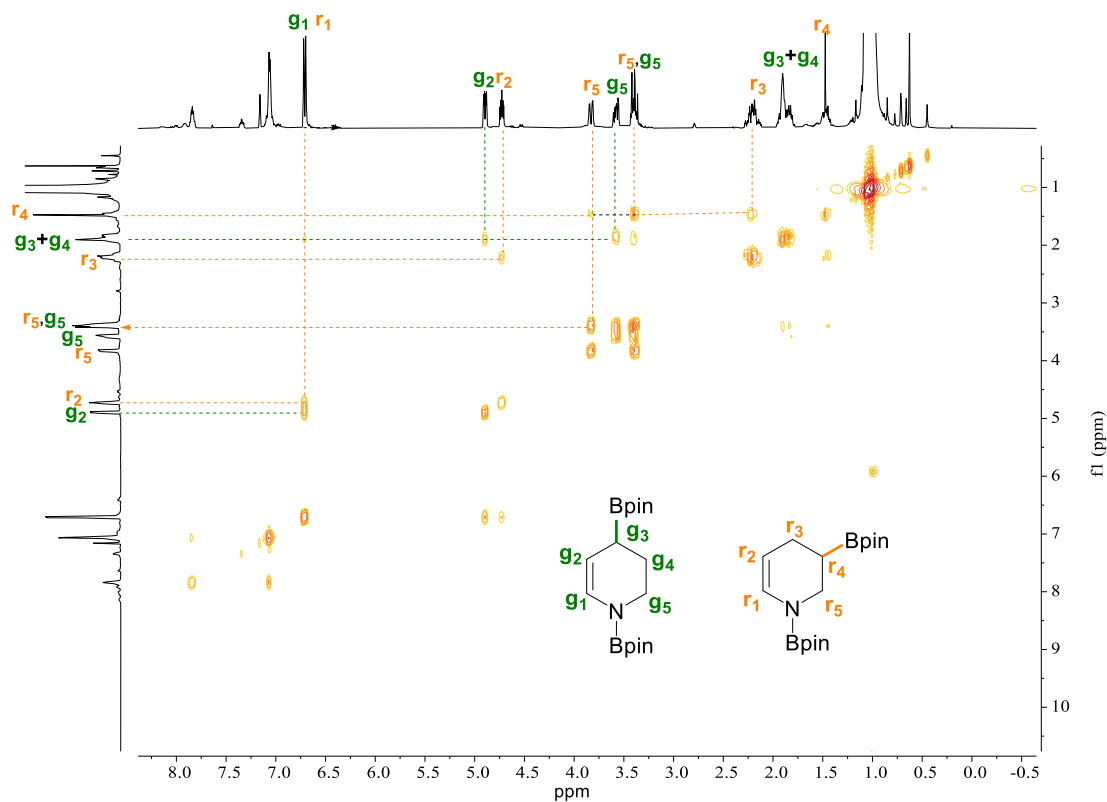

Fig. S5  $^1\text{H}$ - $^1\text{H}$  COSY spectra of the crude reaction mixture for entry 10 in Table S1.

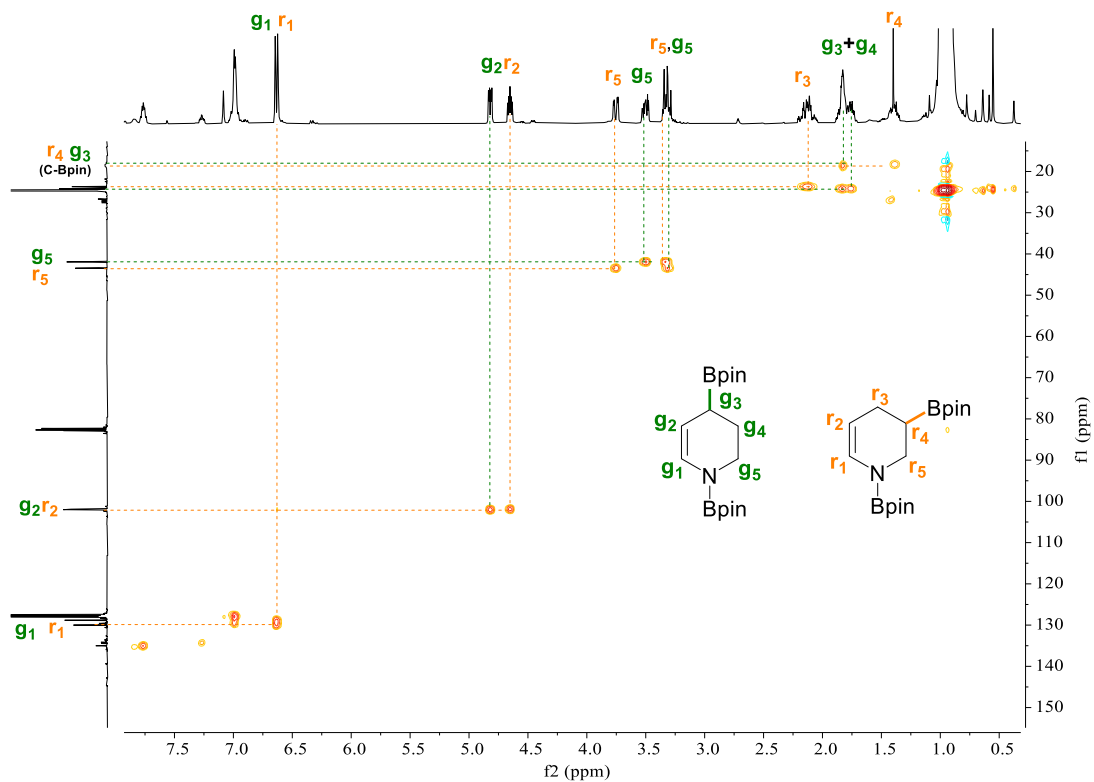

Fig. S6  $^1\text{H}$ - $^{13}\text{C}$  HSQC spectra of the crude reaction mixture for entry 10 in Table S1.



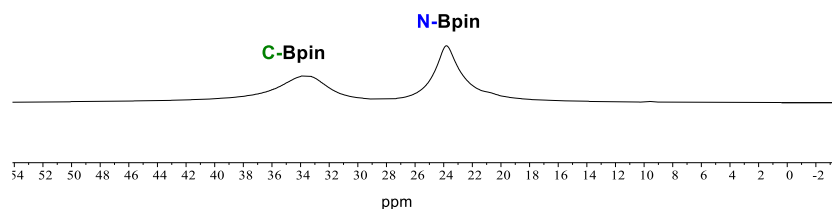

Fig. S7  $^{11}\text{B}\{^1\text{H}\}$  NMR spectrum of the crude reaction mixture for entry 10 in Table S1.

#### V. Generation of **G'** and **R'** in One-Pot (Table 1, entry 3)<sup>S1</sup>

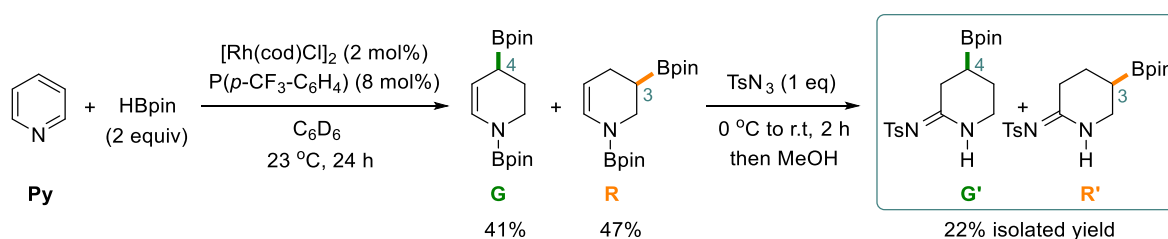

The catalytic reaction procedure using tris(4-trifluoromethylphenyl)phosphine as a ligand was the same as described in the general procedure (*vide supra*). To the resulting mixture containing **G** (41%) and **R** (47%) was added tosyl azide (0.4 mmol, 1.0 equiv) at 0 °C, which was then warmed up to r.t. to react for 2 h. After being quenched with MeOH, the solvent was removed under reduced pressure and the crude products were purified by column chromatography on silica gel to give the mixture of **G'** and **R'** as a colorless solid in 22% (34 mg) of the combined isolated yield. **G'** and **R'** could not be clearly and completely separated due to their similar polarities.

**One-pot gram-scale double hydroboration-amidation:** In glove box, HBpin (36 mmol, 3 equiv) was added to a solution of bis(1,5-cyclooctadiene)dirhodium(I) dichloride (0.048 mmol, 0.4 mol%) and  $\text{P}(p\text{-CF}_3\text{-C}_6\text{H}_4)_3$  (0.096 mmol, 0.8 mol%) in benzene (10 mL) in a 20 mL screw-cap vial. After shaking briefly, pyridine (12 mmol, 1 equiv) was added to the above solution, and the whole mixture solution was stirred at 23 °C for 40 h. After that, all volatiles from the crude mixture were removed under reduced pressure, followed by adding  $\text{CH}_2\text{Cl}_2$  (10 mL) and subsequently tosyl azide (24 mmol, 2 equiv) at 0 °C. The resulting solution was warmed up to r.t. and reacted overnight. After being quenched with MeOH (~5 mL), the solvent was removed under reduced pressure and the crude products were purified by column chromatography on silica gel to give the mixture of **G'** and **R'** in 21% (0.95 g) of the combined isolated yield.

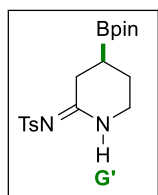

$^1\text{H NMR}$  (400 MHz,  $\text{CDCl}_3$ )  $\delta$  8.53 (s, 1H), 7.78 (d,  $J = 8.3$  Hz, 2H), 7.24 (d,  $J = 8.3$  Hz, 2H), 3.37–3.43 (m, 1H), 3.26–3.33 (m, 1H), 2.52–2.58 (m, 1H), 2.38–2.44 (m, 4H), 1.94–1.82 (m, 1H), 1.77–1.58 (m, 1H), 1.33 (m, 1H), 1.19 (s, 12H);  $^{13}\text{C NMR}$  (101 MHz,  $\text{CDCl}_3$ )  $\delta$  166.34, 142.38, 140.12, 129.22, 129.08, 126.24, 83.77, 77.38, 77.26, 77.06, 76.74, 42.69, 32.23, 24.86, 24.71, 24.69, 24.60, 22.83, 21.47, 14.96;  $^{11}\text{B NMR}$  (128 MHz,  $\text{CDCl}_3$ )  $\delta$  33.00; **MALDI-TOF:** Calculated for  $\text{C}_{18}\text{H}_{27}\text{BKN}_2\text{O}_4\text{S}$   $[\text{M}+\text{K}]^+$ : 417.1422, Found: 417.0321.

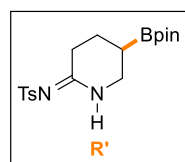

$^1\text{H NMR}$  (400 MHz,  $\text{CDCl}_3$ )  $\delta$  8.52 (s, 1H), 7.78 (d,  $J = 8.3$  Hz, 2H), 7.25 (d,  $J = 8.1$  Hz, 2H), 3.50–3.39 (m, 1H), 3.39–3.28 (m, 1H), 2.59–2.47 (m, 1H), 2.46–2.33 (m, 4H), 1.96–1.84 (m, 1H), 1.64 (m, 1H), 1.35 (m, 1H), 1.20 (s, 12H).  $^{13}\text{C NMR}$  (101 MHz,  $\text{CDCl}_3$ )  $\delta$  166.16, 142.45, 140.04, 129.25, 126.28, 83.90, 43.88, 31.20, 24.74, 24.69, 21.47, 21.09, 17.47.  $^{11}\text{B NMR}$  (128 MHz,  $\text{CDCl}_3$ )  $\delta$  33.19; **MALDI-TOF:** Calculated for  $\text{C}_{18}\text{H}_{27}\text{BKN}_2\text{O}_4\text{S}$   $[\text{M}+\text{K}]^+$ : 417.1422, Found: 417.0359.

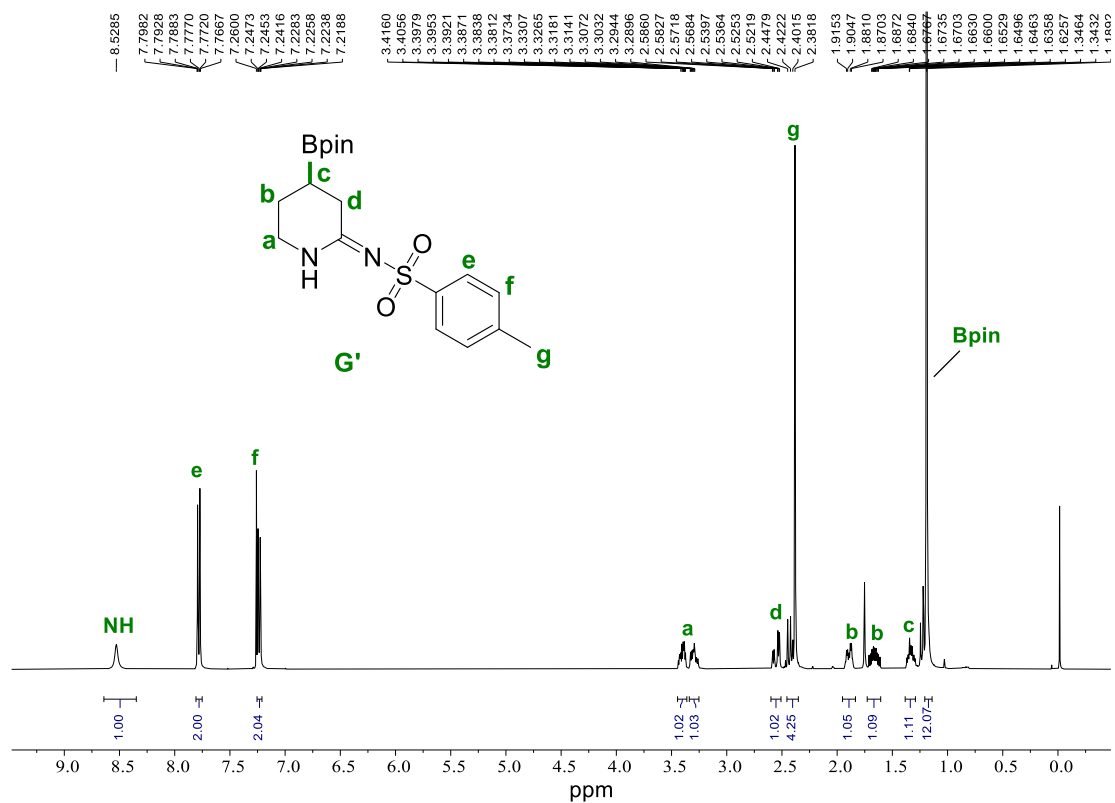

Fig. S8  $^1\text{H}$  NMR spectrum of the product **G'** after chromatographic purification on silica-gel.

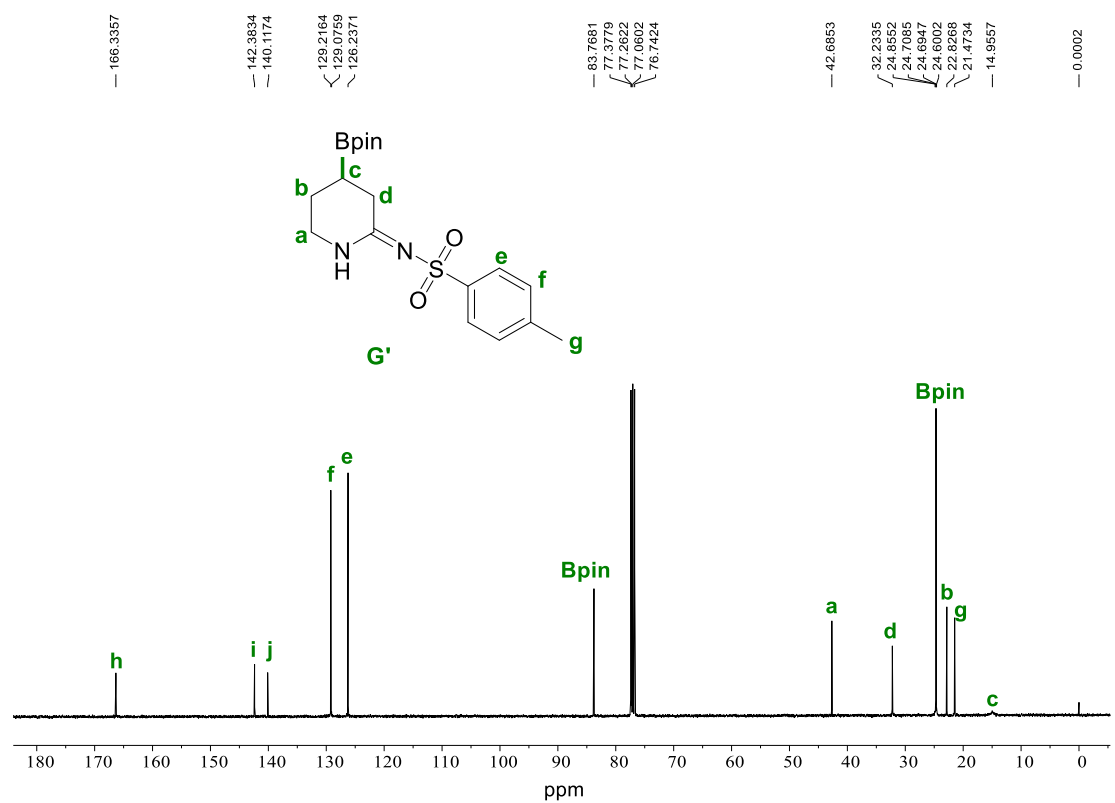

Fig. S9  $^{13}\text{C}\{^1\text{H}\}$  NMR spectrum of the product **G'** after chromatographic purification on silica-gel.

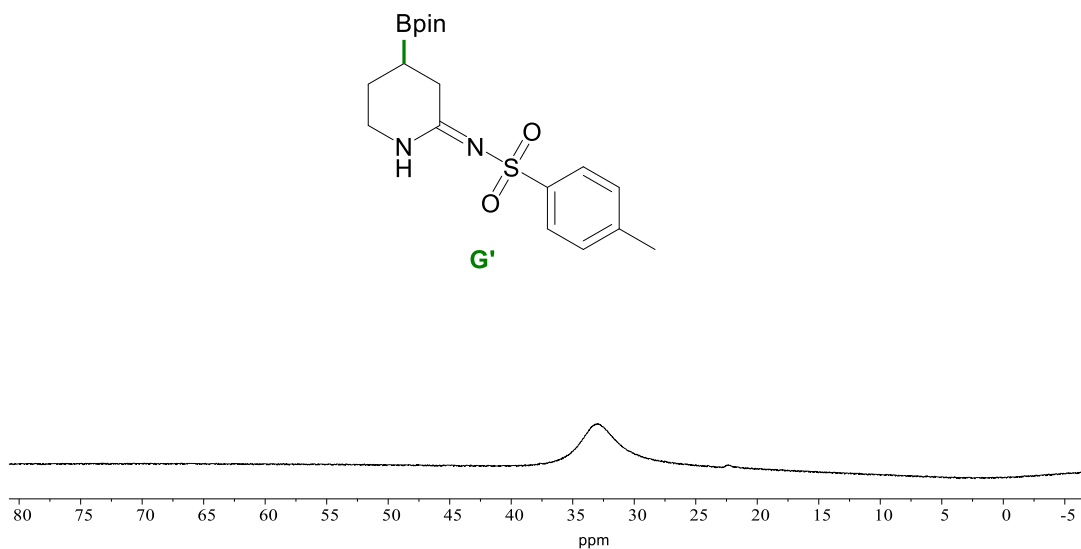

Fig. S10  $^{11}\text{B}\{^1\text{H}\}$  NMR spectrum of the product **G'** after chromatographic purification on silica-gel.

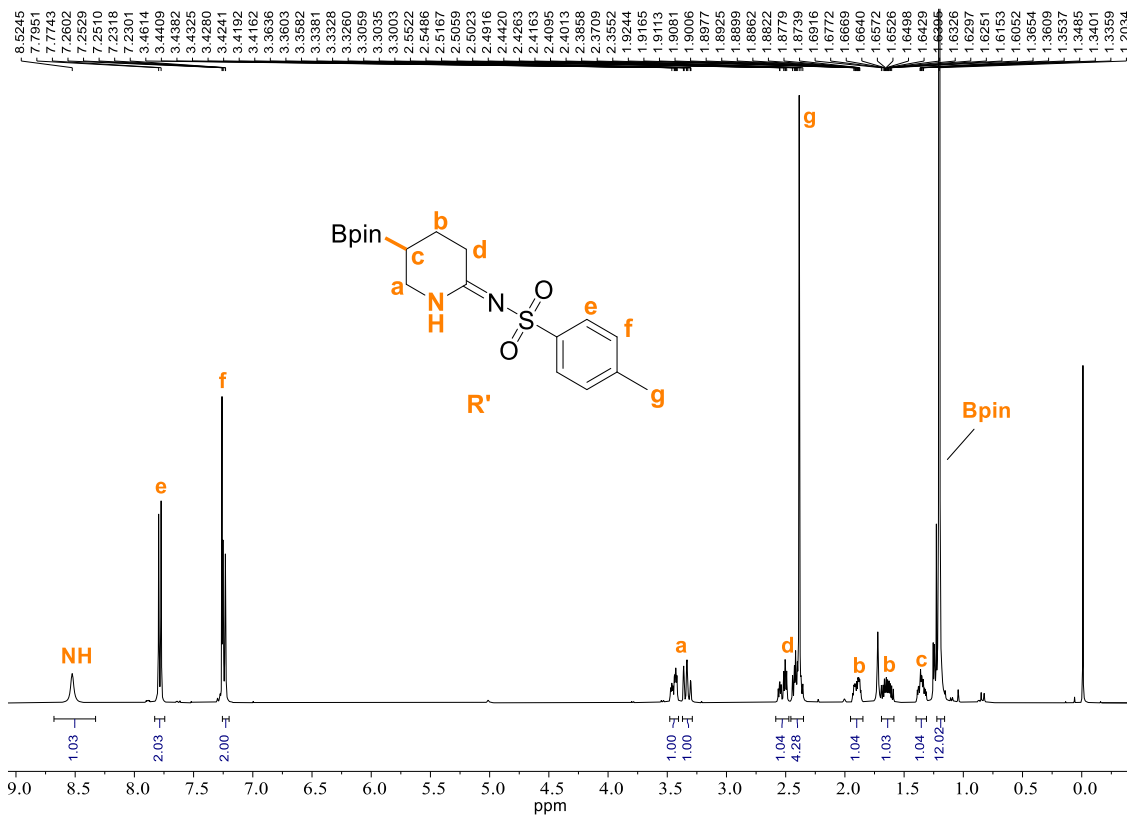

Fig. S11  $^1\text{H}$  NMR spectrum of the product **R'** after chromatographic purification on silica-gel.

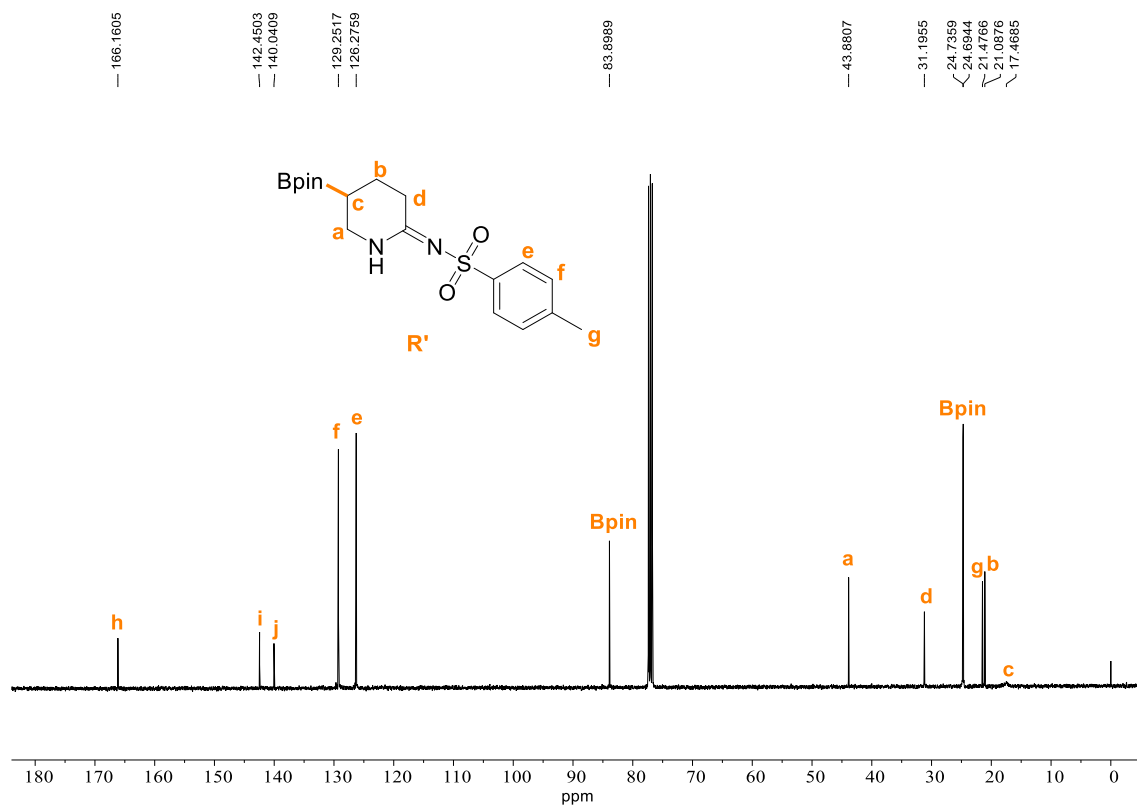

Fig. S12  $^{13}\text{C}\{^1\text{H}\}$  NMR spectrum of the product **R'** after chromatographic purification on silica-gel.

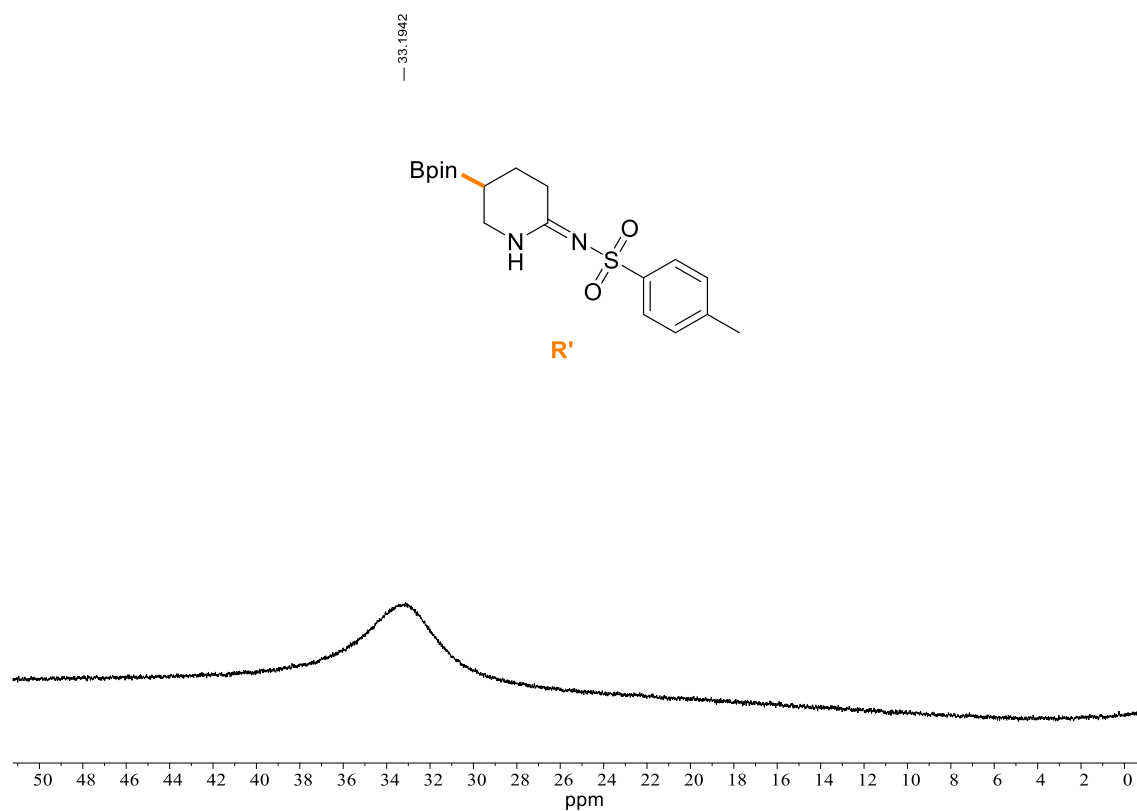

Fig. S13  $^{11}\text{B}\{^1\text{H}\}$  NMR spectrum of the product **R'** after chromatographic purification on silica-gel.

## VI. Mechanistic Experiments (Fig. 1)

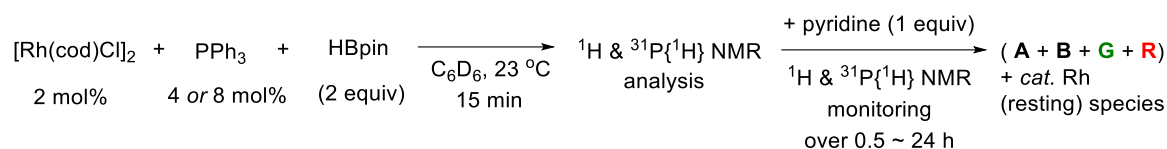

The catalytic reaction procedure using triphenylphosphine as a ligand (4 or 8 mol%) was the same as described in the general procedure. For the catalysis with 4 mol% of PPh<sub>3</sub> (**Table 1**, entry 1), the reaction progress was monitored by <sup>1</sup>H and <sup>31</sup>P{<sup>1</sup>H} NMR at 0.5 h, 2 h, 6 h, and 24 h, while similarly the reaction with 8 mol% of PPh<sub>3</sub> ligand (**Table 1**, entry 2) was followed by <sup>1</sup>H and <sup>31</sup>P{<sup>1</sup>H} NMR at 2 h and 24 h. Prior to the addition of pyridine (1 equiv), the mixture of [Rh(cod)Cl]<sub>2</sub>, PPh<sub>3</sub>, and HBpin was analyzed by <sup>1</sup>H and <sup>31</sup>P{<sup>1</sup>H} NMR within 15 min. The known species Rh(cod)(PPh<sub>3</sub>)Cl [**Rh(I)**]<sup>S2</sup> and (*trans*-PPh<sub>3</sub>)<sub>2</sub>RhCl(H)(Bpin) [**Rh(III)**]<sup>S3</sup> were clearly observed. The species **Rh(III)** completely disappeared in both <sup>1</sup>H and <sup>31</sup>P NMR within 0.5 h upon the addition of pyridine (1 equiv), while instead, new peaks assignable to an isomeric mixture of the Rh(III) coordinating to pyridine molecule(s) [**Rh(III)-Py**] (Py = pyridine) were observed in <sup>1</sup>H NMR spectra (at δ -16.5 and -17.1 as broad singlets) (**Table 1**, entries 1 and 2). The two broad hydride peaks assigned to [**Rh(III)-Py**] completely disappeared upon addition of another 1 equiv HBpin after the 24 h-reaction where pyridine was quantitatively consumed out to be the hydroboration products (**Table 1**, entry 2).

### VI-1. <sup>1</sup>H NMR monitoring of the catalytic reaction (Fig. 1)

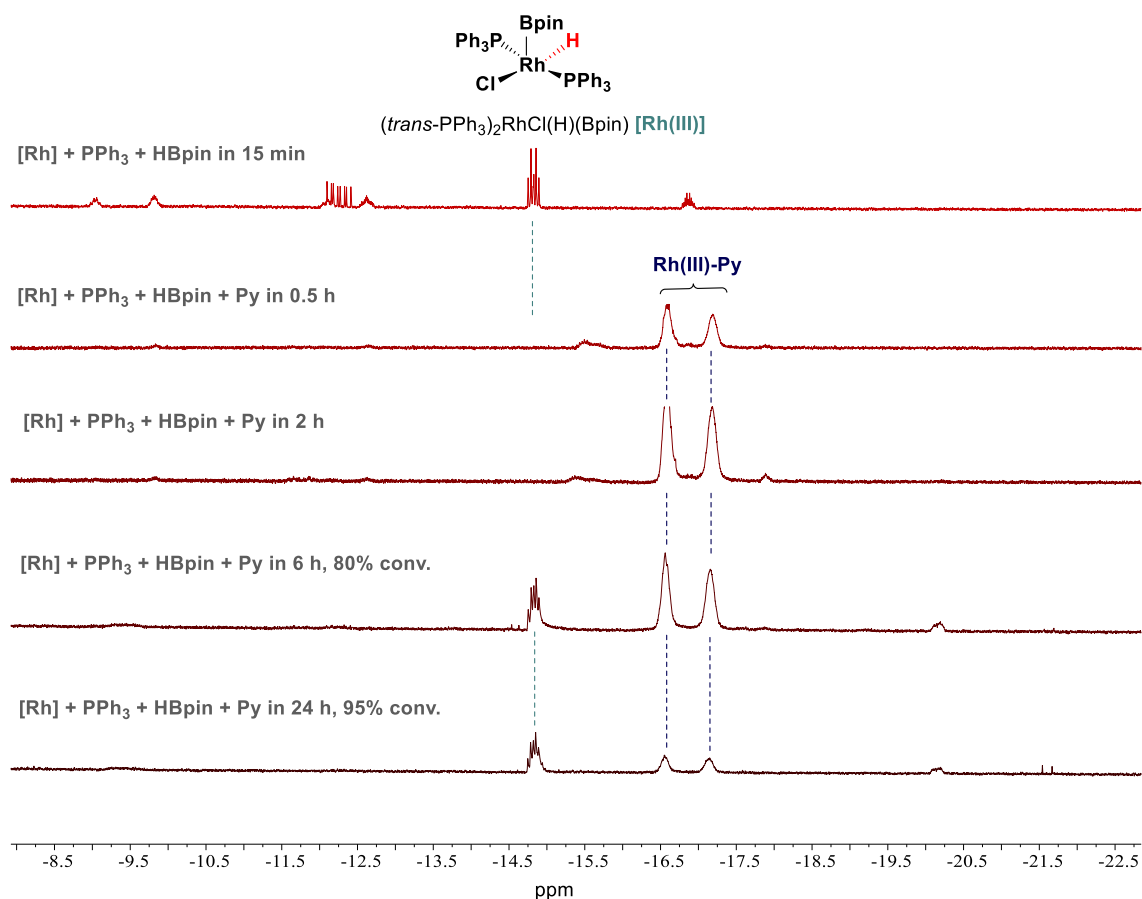

**Fig. S14** Overlay of the Rh-H region of the <sup>1</sup>H NMR spectra at variable reaction times (**Table 1**, entry 1; P/Rh = 1).

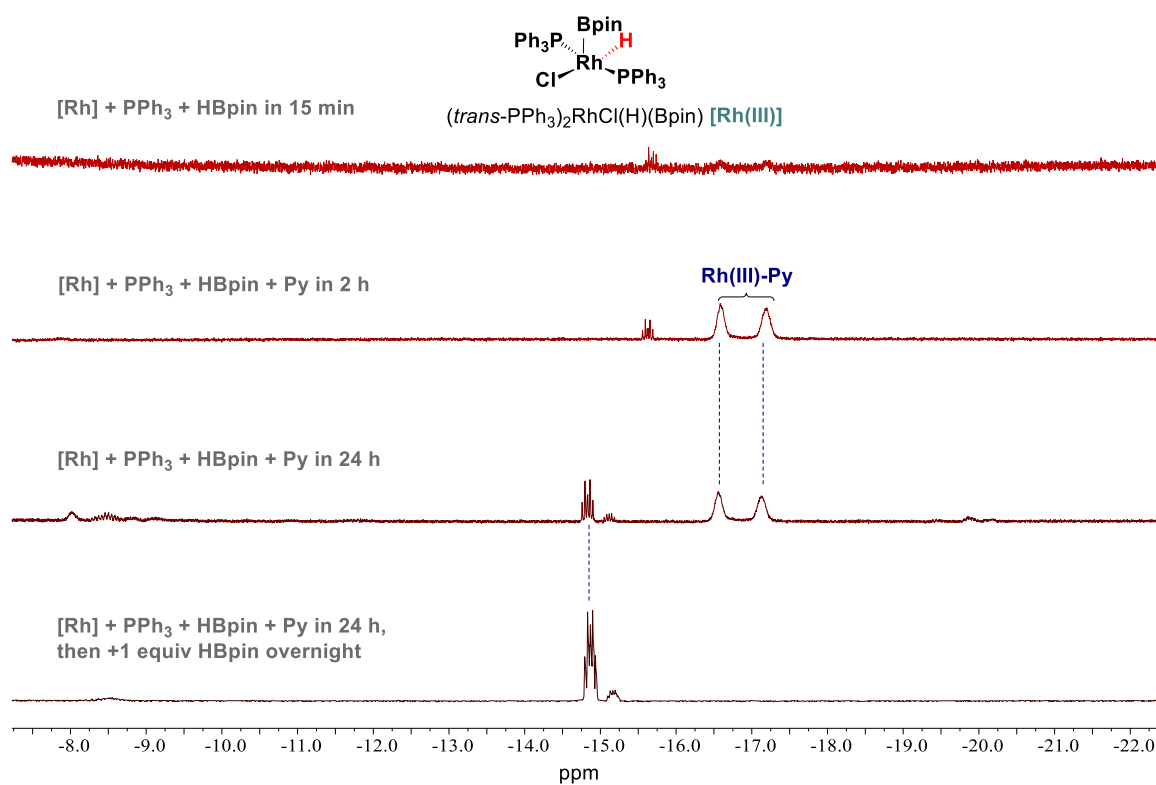

Fig. S15 Overlay of the Rh–H region of the <sup>1</sup>H NMR spectra at variable reaction times (Table 1, entry 2; P/Rh = 2).

VI -2. <sup>31</sup>P{<sup>1</sup>H} NMR monitoring of the catalytic reaction (Fig. 1)

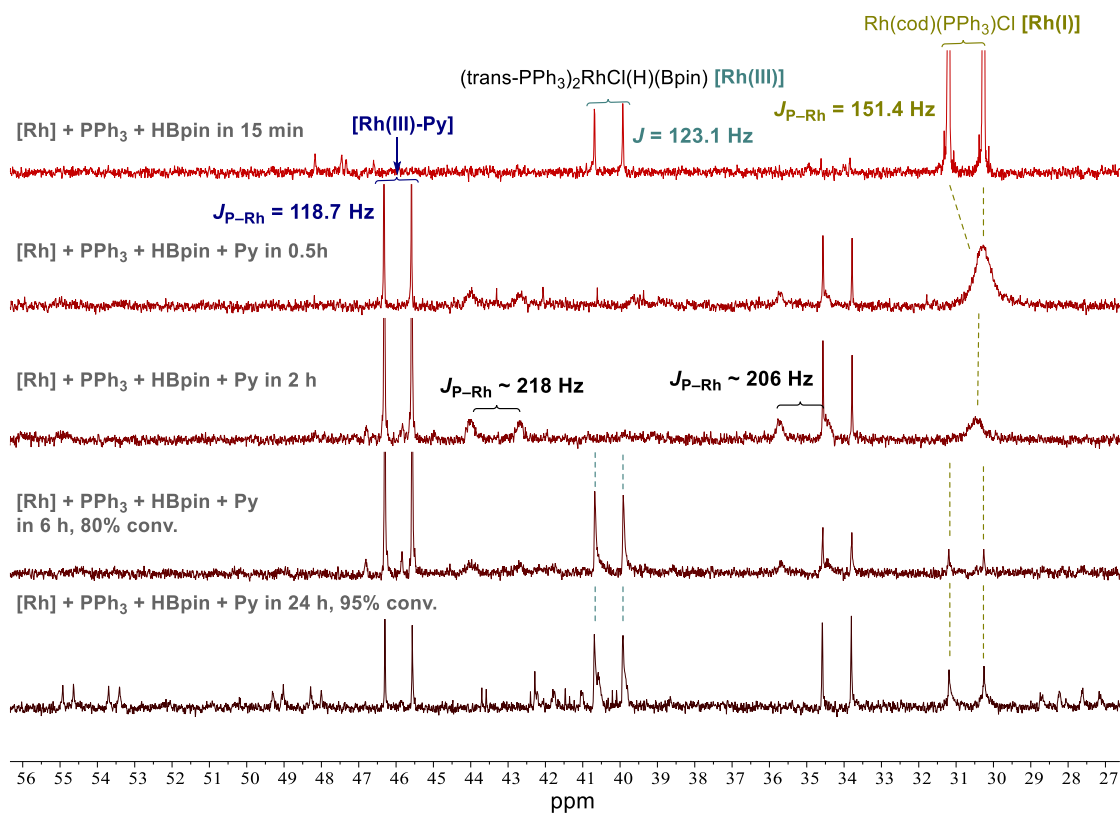

Fig. S16 Overlay of the <sup>31</sup>P{<sup>1</sup>H} NMR spectra at variable catalytic reaction times (Table 1, entry 1; P/Rh = 1)

### VI -3. Variable-temperature $^1\text{H}$ NMR of the catalytic solution (Fig. 1)

The catalytic reaction conditions were modified from the standard conditions of entry 1 in Table 1 for the mechanistic study purpose – two-folds loadings of the Rh precatalyst and  $\text{PPh}_3$  ligand. The  $^1\text{H}$ ,  $^{31}\text{P}\{^1\text{H}\}$  NMR, and  $^1\text{H}$ - $^{31}\text{P}$  gHMBC<sup>S4</sup> optimized for  $^n\text{J}_{\text{P-H}}$  of 100 Hz were measured over the catalytic reaction solution at 1 h at 23 °C. Then,  $^{31}\text{P}\{^1\text{H}\}$  NMR was immediately taken at 50 °C within 0.5 h. As a result, the two Rh hydride peaks in the  $^1\text{H}$  NMR were found to correlate with the  $^{31}\text{P}$  peak at  $\delta$  46 (at 23 °C) and coalesce into a broad single peak (*ca.*  $\delta$  -17.0) at 50 °C.

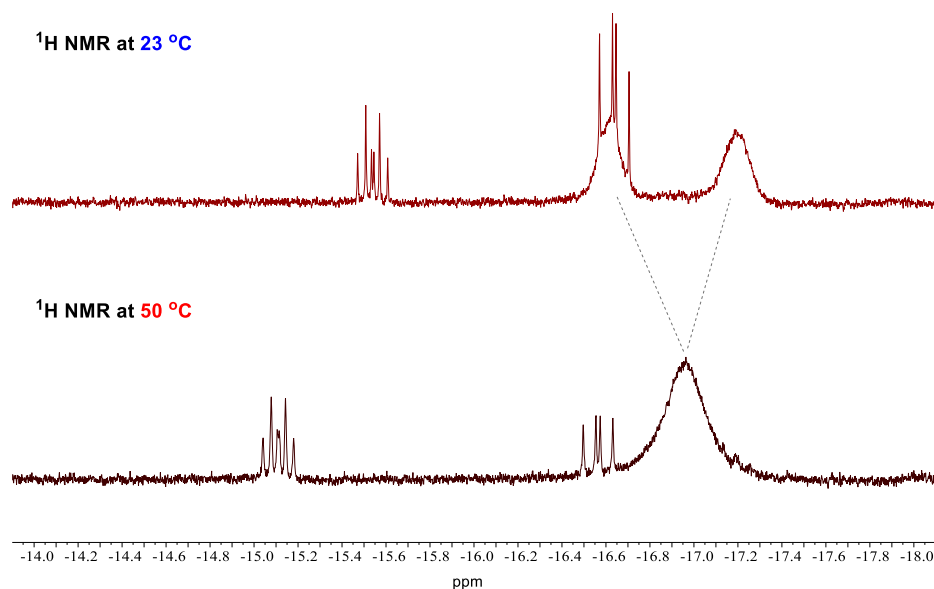

Fig. S17 Overlay of the  $^{31}\text{P}\{^1\text{H}\}$  NMR spectra at 23 °C (in 1 h) and then 50 °C within 0.5 h.

### VI -4. $^1\text{H}$ - $^{31}\text{P}$ two-dimensional correlation NMR of the catalytic solution (Fig. 1)

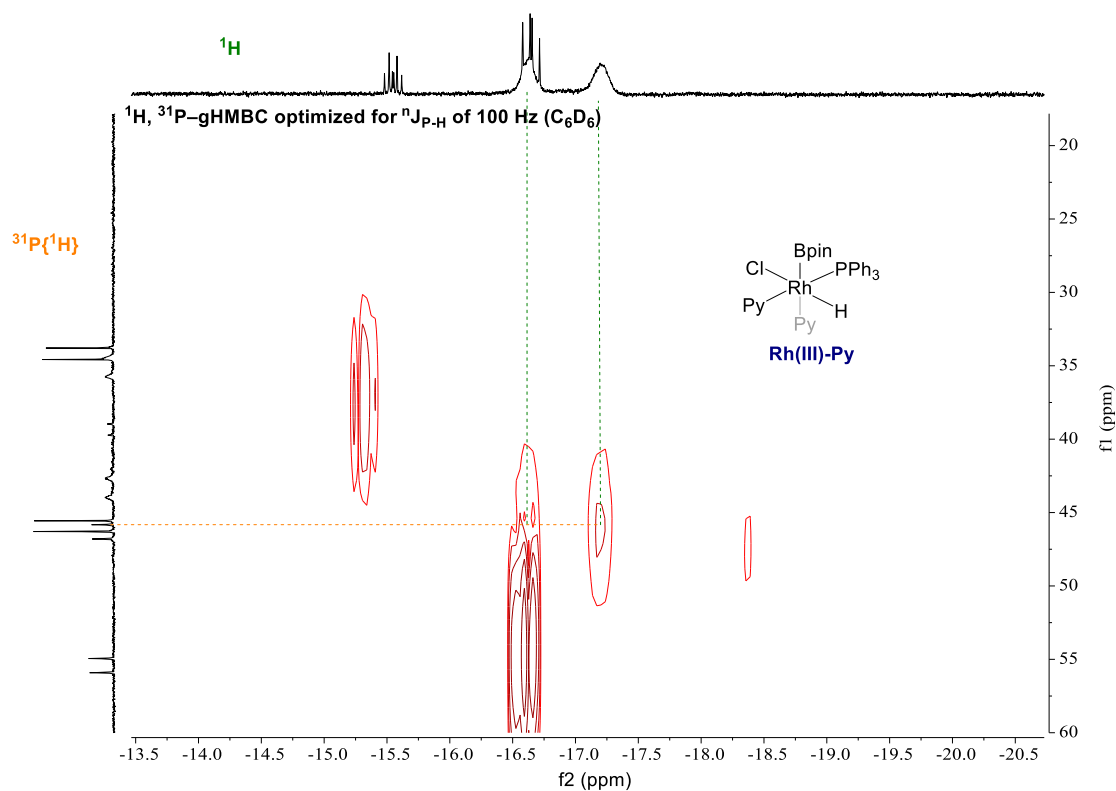

Fig. S18 The  $^1\text{H}$ - $^{31}\text{P}$  gHMBC correlation between Rh-H and Rh-PPh<sub>3</sub> moieties.

## VI-5. MALDI-TOF Mass analysis of the catalytic solution (Fig. 1)

The catalytic solution for MALDI-TOF Mass measurement was prepared according to the general procedure using  $P(p\text{-CF}_3\text{-C}_6\text{H}_4)_3$  as a phosphine ligand (Table 1, entry 3). An aliquot of the catalytic reaction solution at 4 h was subjected for the MALDI-TOF analysis. The Rh species bearing two pyridine molecules and a single phosphine [ $\text{PAr}_3 = P(p\text{-CF}_3\text{-C}_6\text{H}_4)_3$ ] in addition to Bpin and Cl ligands, was identified.

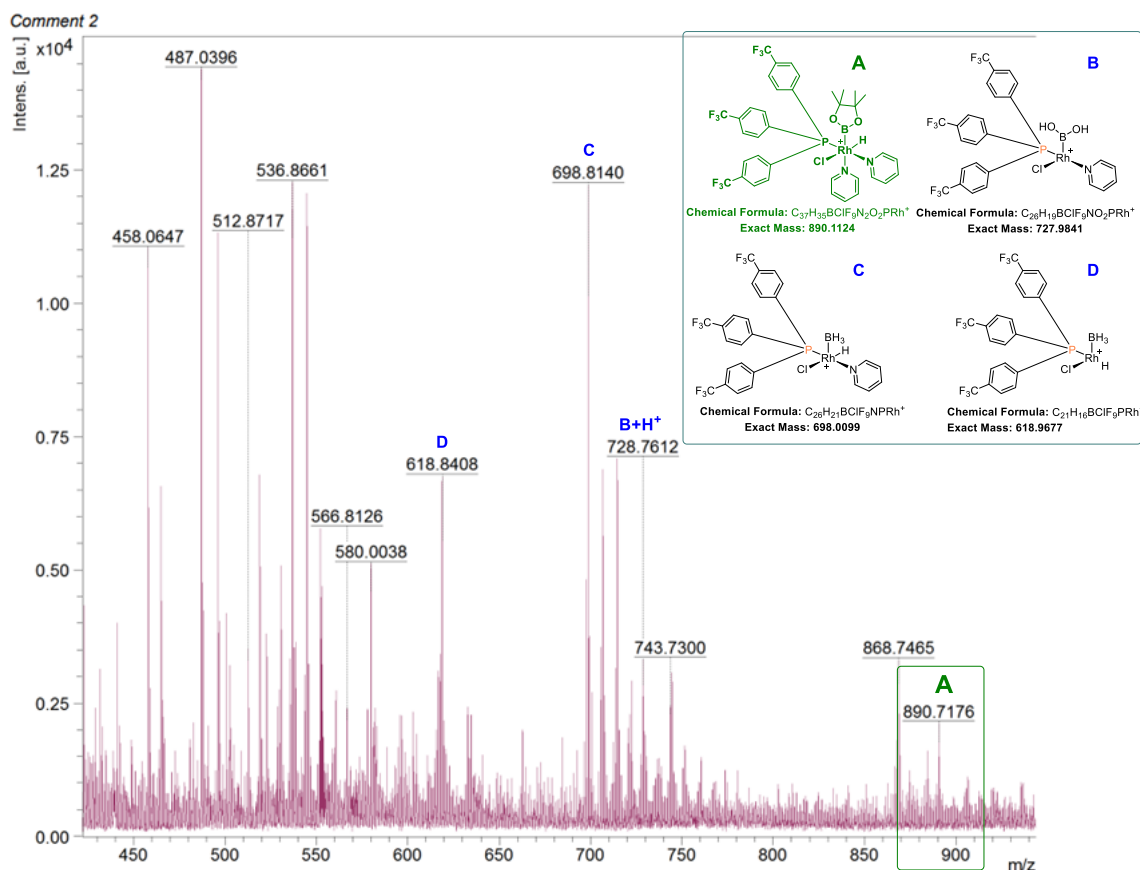

Fig. S19 MALDI-TOF spectrum of the catalytic reaction solution at 4 h (Fig. 1).

## VI-6. $^1\text{H}$ NMR monitoring of the stoichiometric reaction (Fig. 2a-b)

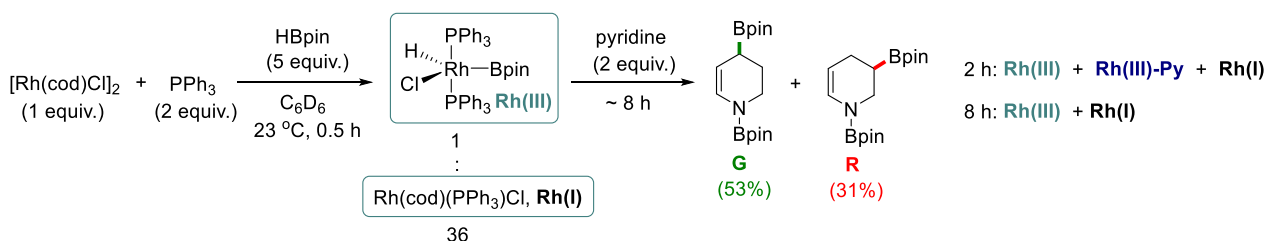

In glove box, bis(1,5-cyclooctadiene)-dirhodium(I) dichloride (0.032 mmol, 1 equiv) and triphenylphosphine (0.128 mmol, 2 equiv) in deuterated benzene (0.5 mL) were mixed in a J. Young NMR tube. Then, HBpin (0.16 mmol, 5 equiv) was added to the catalyst solution to react for 0.5 h at 23 °C. After measuring the  $^1\text{H}$  and  $^{31}\text{P}$  NMR, pyridine (0.128 mmol, 2 equiv) was then added to the above reaction solution. This reaction mixture was subjected to  $^1\text{H}$  and  $^{31}\text{P}\{^1\text{H}\}$  NMR monitoring over 8 h at 23 °C. The identical Rh species were also observed in this stoichiometric reaction as observed in the catalytic reaction, e.g. [Rh(I)], [Rh(III)], and [Rh(III)-Py]. The signals due to the pyridine adduct [Rh(III)-Py] completely disappeared upon quantitative conversion of pyridine in 8 h.



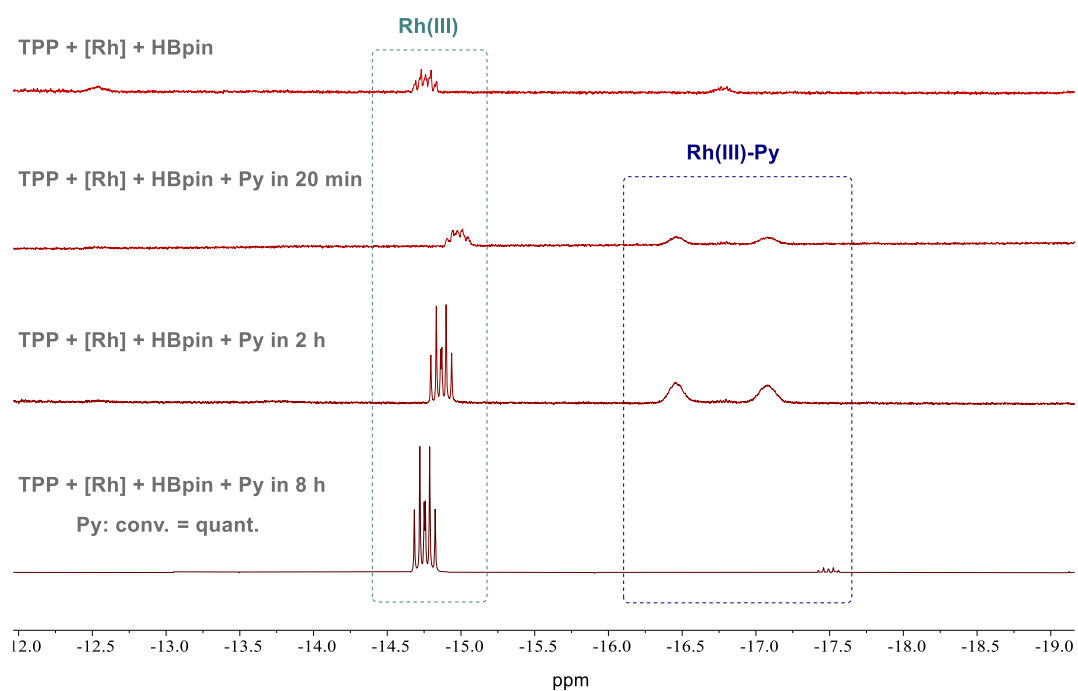

Fig. S20 Overlay of the Rh-H region of the  $^1\text{H}$  NMR spectra at variable reaction times of the stoichiometric reaction.

VI -7.  $^{31}\text{P}\{^1\text{H}\}$  NMR monitoring of the stoichiometric reaction (Fig. 2c-d)

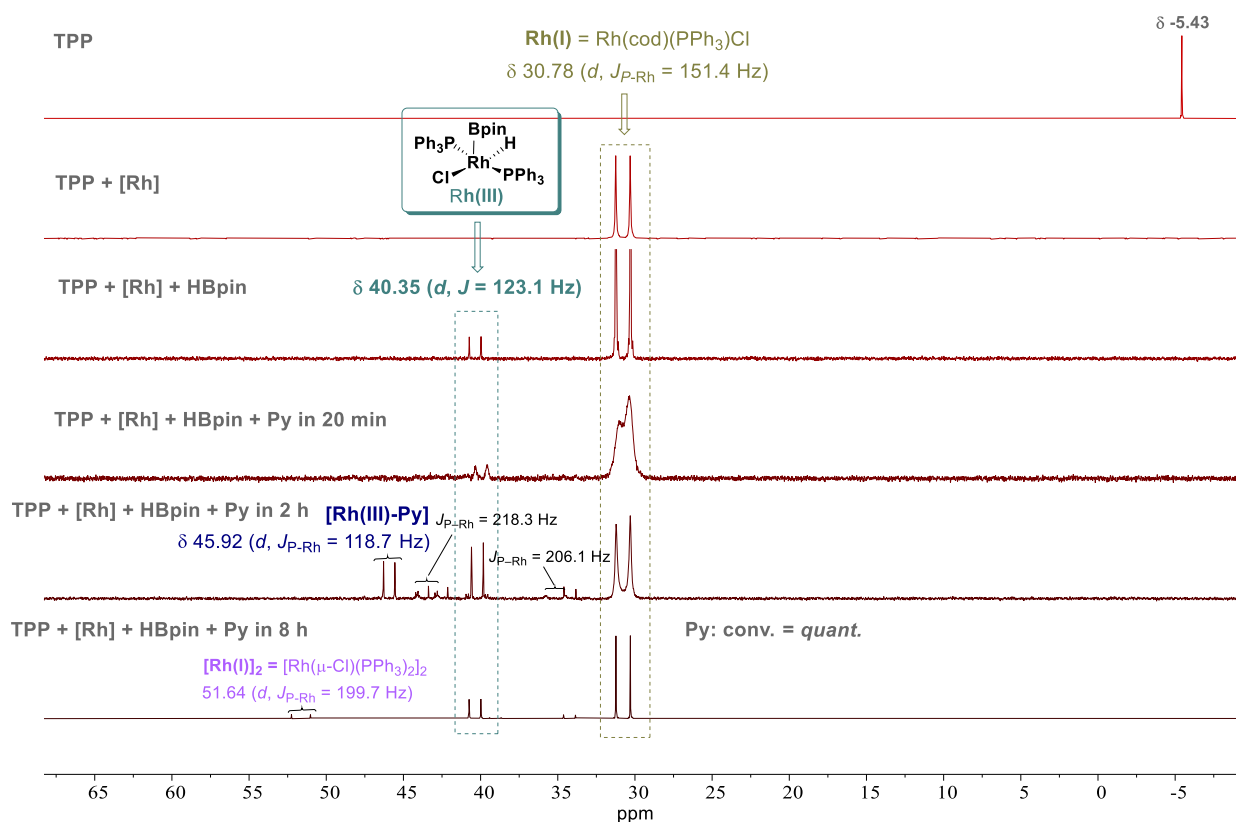

Fig. S21 Overlay of the  $^{31}\text{P}\{^1\text{H}\}$  NMR spectra at variable stoichiometric reaction times.

## VII. Density Functional Theory (DFT) Calculations

### VII-1. Computational details

All calculations were carried out using DFT<sup>SS</sup> as implemented in the Jaguar 9.1 suite<sup>S6</sup> of ab initio quantum chemistry programs. Geometry optimizations were performed with the B3LYP including Grimme's D3 dispersion correction.<sup>S7</sup> The 6-31G\*\* basis set was used for main group atoms and Rh was represented using the Los Alamos LACVP basis set that includes relativistic effective core potentials. The energies of optimized structures were reevaluated by additional single-point calculations on each optimized geometry using Dunning's correlation consistent triple- $\zeta$  basis set cc-pVTZ(-f)<sup>S8</sup> which includes a double set of polarization functions. For Rh, we used a modified version of LACVP, designated as LACV3P, in which the exponents were decontracted to match the effective core potential with the triple- $\zeta$  quality. Solvation energies were evaluated by a self-consistent reaction field (SCRF)<sup>S9</sup> approach based on accurate numerical solutions of the Poisson-Boltzmann equation. In the results reported, solvation calculations were carried out at the same level of theory as the geometry optimization, employing a dielectric constant of  $\epsilon = 2.284$  for benzene. As is the case for all continuum models, the solvation energies are subject to empirical parameterization of the atomic radii that are used to generate the solute surface. We employed the standard set of Van der Waals radii in Jaguar for H(1.150 Å), B(2.042 Å), C(1.900 Å), N(1.600 Å), O(1.600 Å), P(2.074 Å), Cl(1.974 Å) and Rh(1.464 Å).<sup>S10</sup> Analytical vibrational frequencies within the harmonic approximation were computed with the 6-31G\*\*/LACVP basis to confirm proper convergence to well-defined minima or saddle points on the potential energy surface. The intermediates were confirmed with no imaginary frequency, while transition states showed a single imaginary frequency.

The energy components have been computed with the following protocol. The free energy in solution-phase,  $G(\text{sol})$ , has been calculated as follows, with  $T = 298.15$  K to match the experimental conditions.

$$\begin{aligned}G^0(\text{sol}) &= G^0(\text{gas}) + G^{\text{solv}} \\G^0(\text{gas}) &= H(\text{gas}) - TS(\text{gas}) \\H(\text{gas}) &= E(\text{SCF}) + \text{ZPE} \\ \Delta E(\text{SCF}) &= \sum E(\text{SCF}) \text{ for products} - \sum E(\text{SCF}) \text{ for reactants} \\ \Delta G^0(\text{sol}) &= \sum G^0(\text{sol}) \text{ for products} - \sum G^0(\text{sol}) \text{ for reactants}\end{aligned}$$

### VII-2. Inner-sphere pathway from **1b**

To generate dihydropyridine from pyridine, the dearomatization of pyridine is necessarily required in the reaction including C–H bond and N–B bond formation. Initially, we considered the inner-sphere hydride transfer to the C2-site of coordinated pyridine in **1b** as proposed by Suginome<sup>S11</sup> (Fig. S22, pink dashed line), however it was discarded showing a prohibitive barrier of over 31.1 kcal/mol.

We also investigated the pathway forming a Lewis acid-base adduct **2** from **1b**. As illustrated in the gray dashed line, the coordinated pyridine in **1b** is migrated from Rh(III) to Bpin, rendering another Lewis acid–base adduct **1c** more unstable than the adduct **1b**. It is attributed by the weaker interaction of the nitrogen lone pair of pyridine with the empty p orbital of B rather than that with the empty d orbital of Rh(III).<sup>S12</sup> The reductive elimination via **1c-TS** with a barrier of 15.2 kcal mol<sup>-1</sup> regenerates the original H–B bond with Rh(I) catalyst in **2**. Given these calculated results in which the pyridine migration transition state (**1b-TS**) is higher than oxidative coupling (**2-TS**), we concluded the pathway for direct formation of **2** from **1** would be faster.

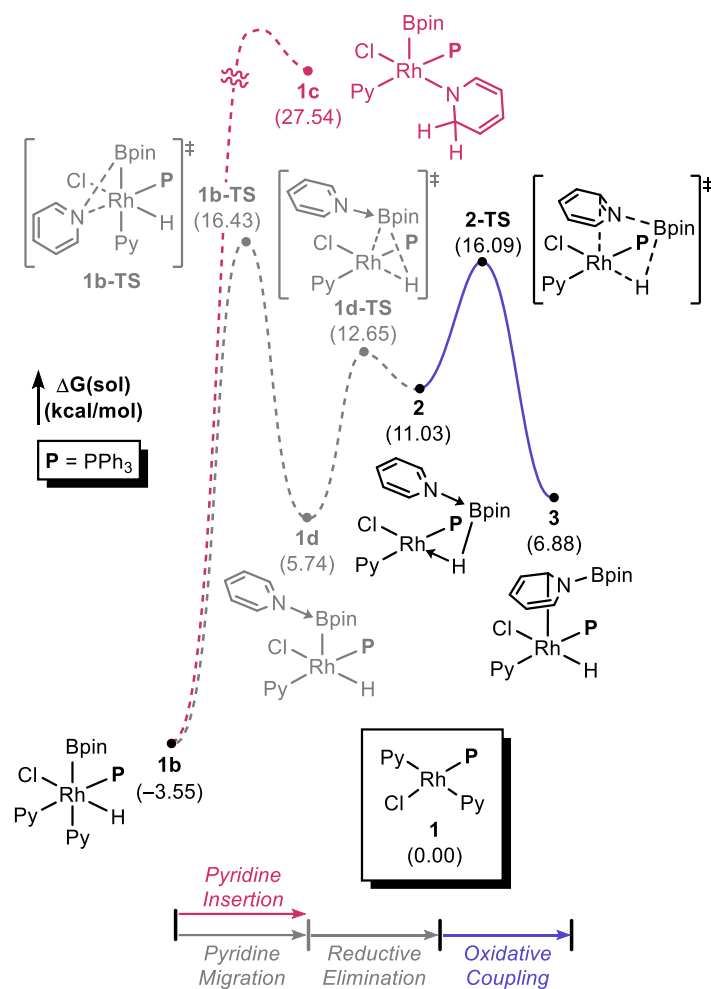

**Fig. S22** The DFT-calculated energy profile for dearomatization initiated by hydride insertion (pink dashed line) and dearomatization initiated by pyridine migration from **1b** (gray dashed line).

### VII-3. Reductive elimination from 3 without dissociating pyridine

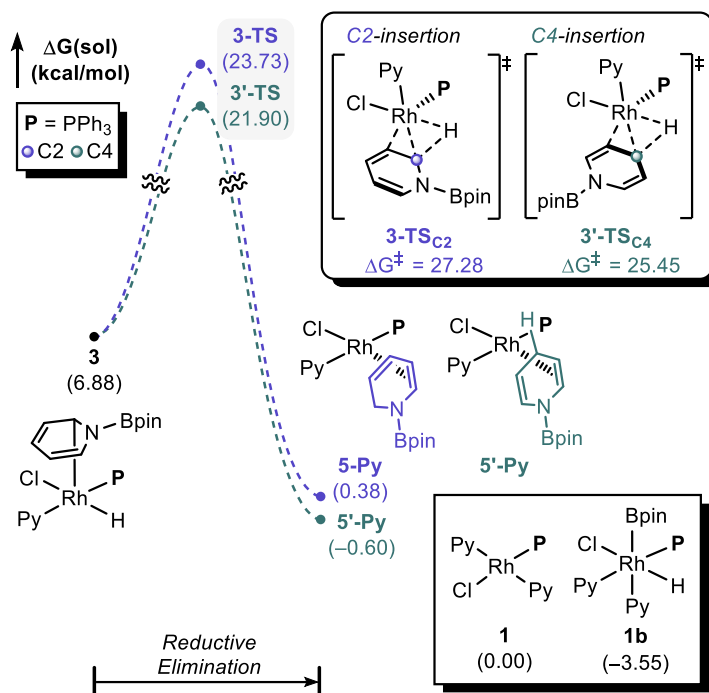

Fig. S23 The DFT-calculated energy profile for reductive elimination from 3.

### VII-4. Detailed analysis on regioselective reductive elimination in the 1<sup>st</sup>-hydroboration

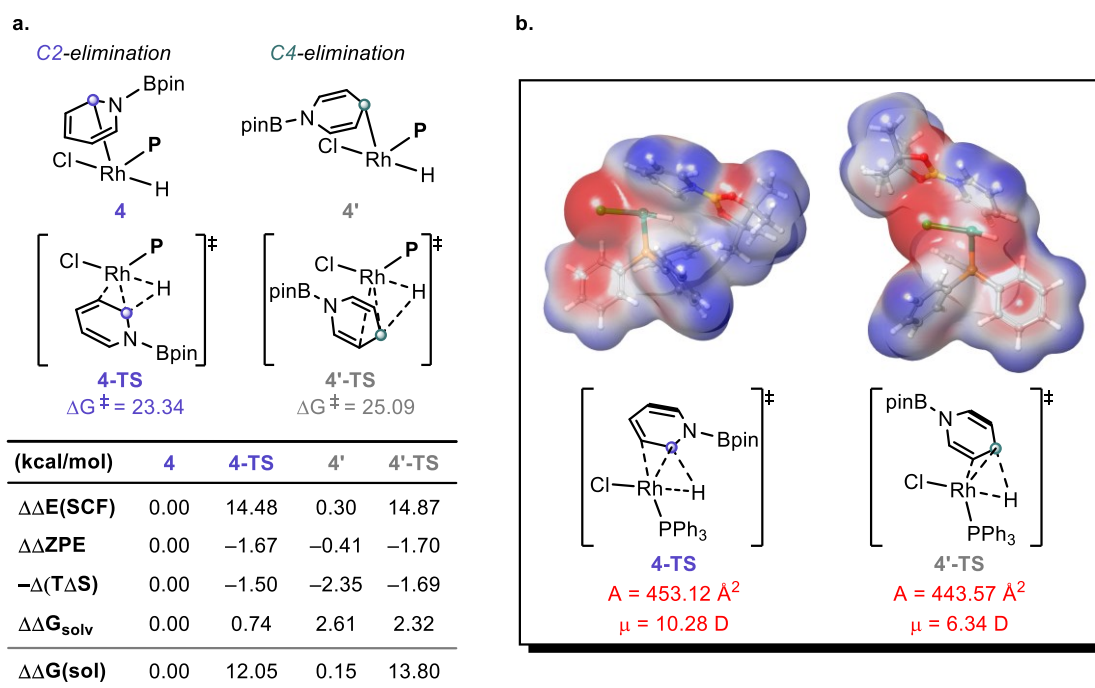

Fig. S24 (a) The free energy decomposition of the intermediates and transition states for the 1<sup>st</sup> reductive elimination with the intermediates 4 as a reference, and (b) the electrostatic potential maps of 4-TS and 4'-TS with surface areas and dipole moments.

A detailed comparison of energy components indicated that the energy difference between **4-TS** and **4'-TS** ( $\Delta\Delta G^\ddagger$ ) mainly arises from the solvation energy ( $\Delta\Delta G_{\text{solv}} = 1.58 \text{ kcal mol}^{-1}$ , see Fig. S24†). Accordingly, the structural property of two regioisomers was evaluated, indicating that the greater solvation energy of **4-TS** is reflected by its larger surface area presumably because the bulky BPin moiety has spatially more deviated from the center of its 3D structure;  $453.12 \text{ \AA}^2$  of **4-TS** and  $443.57 \text{ \AA}^2$  of **4'-TS**. It is noteworthy that **A** favors forming a stable  $\eta^4$ -Rh complex **5** at  $-0.1 \text{ kcal mol}^{-1}$ .

### VII-5. Detailed analysis on regioselective reductive elimination in the 2<sup>nd</sup>-hydroboration

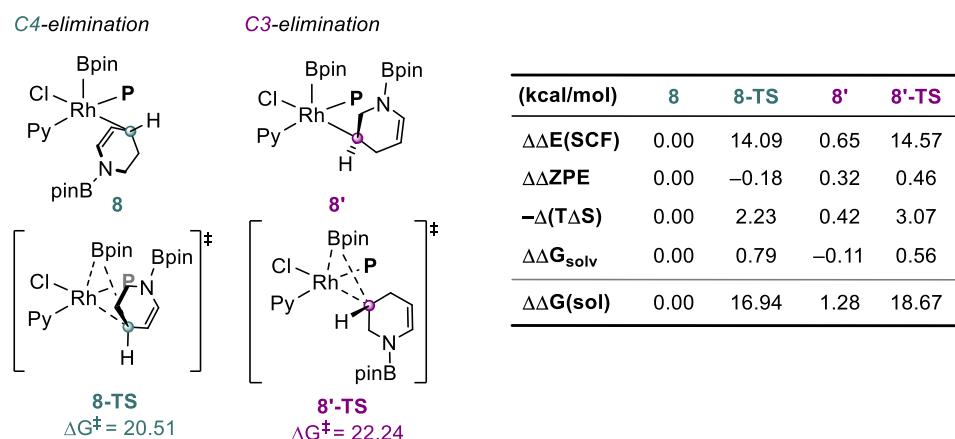

Fig. S25 Free energy decomposition of the intermediates and transition states for 2<sup>nd</sup> reductive elimination.

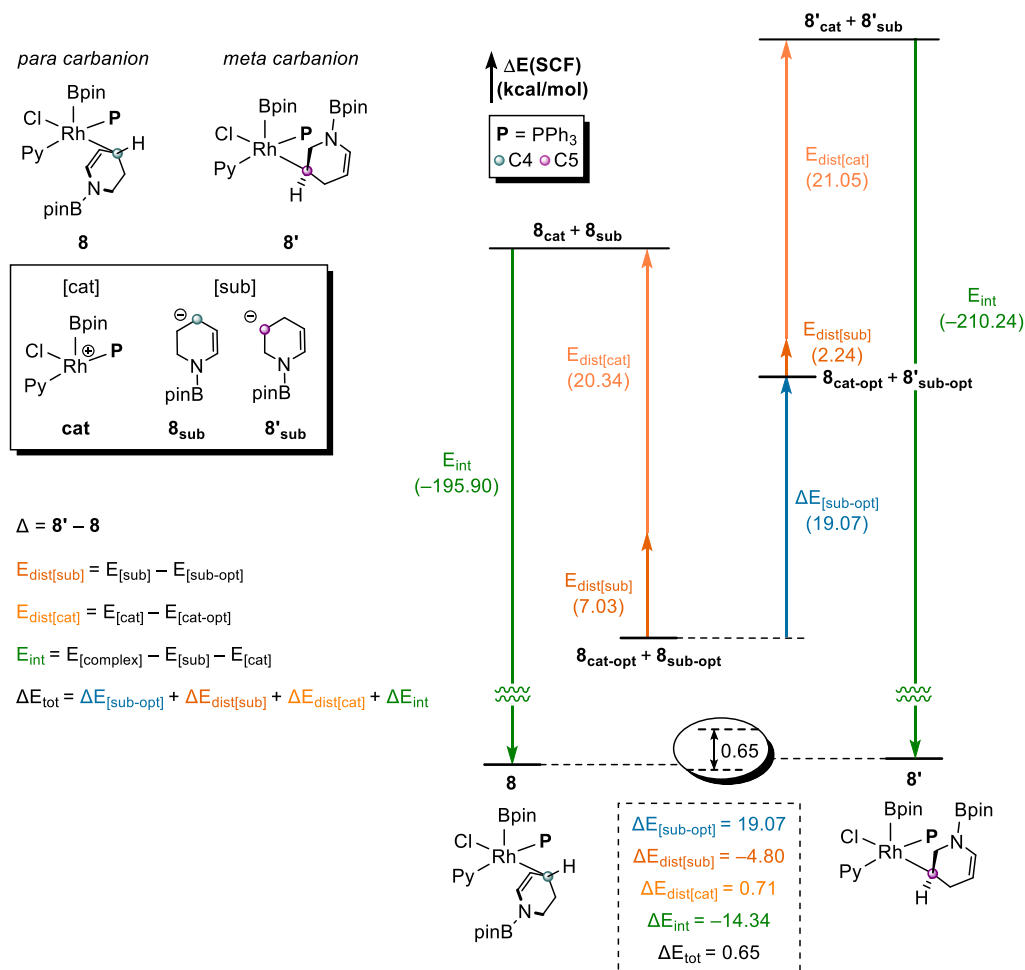

Fig. S26 Distortion interaction analysis of **8** and **8'**.

The significant difference between **8** and **8'** is the carbanion character of the substrate unit. The substrate part of **8** (para carbanion) is conjugated with the double bond (C5=C6), while the substrate part of **8'** (meta carbanion) is isolated. We hypothesized that the delocalization effect of conjugated substrates would effectively stabilize the total energy of its intermediates compared to that of the isolated substrates. To elucidate the hypothesis, we conducted the distortion interaction analysis<sup>S13</sup> of the **8** and **8'**, dividing into the catalyst segment [cat] and the *N*-tetrahydropyridine segment [sub] (see Fig. S26†). We considered not only the distortion energy ( $E_{\text{dist[cat]}}$  and  $E_{\text{dist[sub]}}$ ) and interaction energy ( $E_{\text{int}}$ ) of each intermediate but also the relative stability of the substrate unit ( $\Delta E_{\text{[sub-opt]}}$ ) obtained from the structurally relaxed substrate [sub-opt]. When defining  $\Delta$ , the difference between para carbanion and meta carbanion is used, and the total energy gap ( $\Delta E_{\text{tot}}$ ) is same as the sum of  $\Delta E_{\text{dist[sub]}}$ ,  $\Delta E_{\text{dist[cat]}}$ ,  $\Delta E_{\text{int}}$ , and  $\Delta E_{\text{[sub-opt]}}$ . Comparing **8** and **8'** with *N*-Bpin-1,2,3,4-tetrahydropyridinyl (**Py**) as substrate fragment, it is appreciable that  $\Delta E_{\text{[sub-opt]}}$  of 19.1 kcal mol<sup>-1</sup> significantly contributes to the positive  $\Delta E_{\text{tot}}$  of 0.7 kcal mol<sup>-1</sup>, despite  $\Delta E_{\text{dist[sub]}}$ ,  $\Delta E_{\text{dist[cat]}}$ , and  $\Delta E_{\text{int}}$  evaluated by -4.8, 0.7, and -14.3 kcal mol<sup>-1</sup>, respectively.

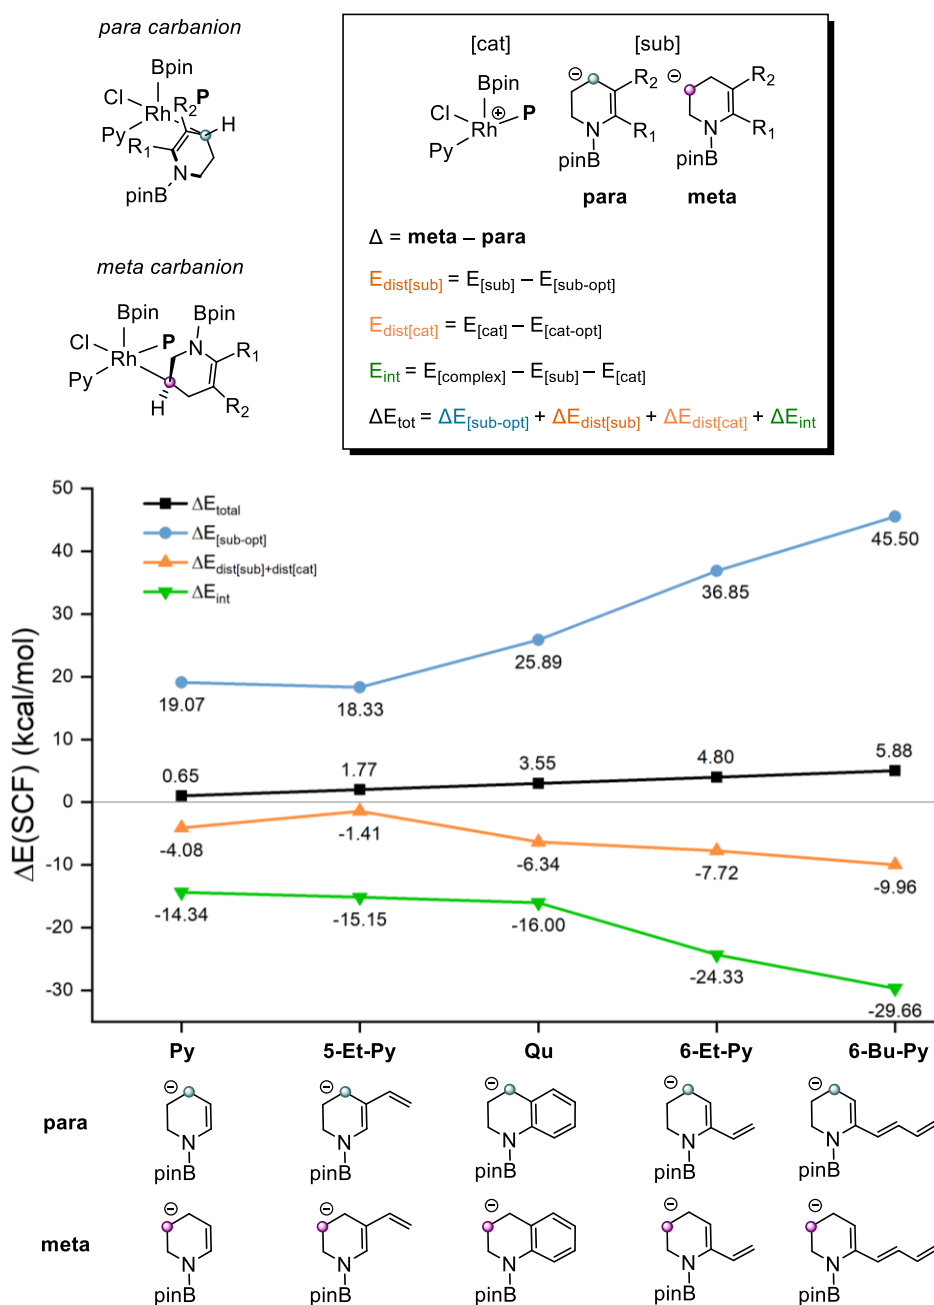

Fig. S27 Distortion interaction analysis of five models with various conjugated systems.

To get more clear evidence for the regioselectivity, we also performed same analysis for various model intermediates with an extended conjugation at C5- or C6-site of Py such as *N*-Bpin-6-vinyl-1,2,3,4-tetrahydropyridinyl (**6-Et-Py**), *N*-Bpin-5-vinyl-1,2,3,4-tetrahydropyridinyl (**5-Et-Py**), *N*-Bpin-6-(buta-1,3-dien-1-yl)-1,2,3,4-tetrahydropyridinyl (**6-Bu-Py**), and *N*-Bpin-1,2,3,4-

tetrahydroquinolinyl (**Qu**). As shown in Fig. S27†, comparing the two intermediates bearing para carbanion and meta carbanion, the gap of total energy ( $\Delta E_{\text{tot}}$ ) increased in the order of **Py**, **5-Et-Py**, **Qu**, **6-Et-Py**, and **6-Bu-Py** ( $\Delta E_{\text{tot}} = 0.6, 1.8, 3.5, 4.8,$  and  $5.9 \text{ kcal mol}^{-1}$ ).  $\Delta E_{\text{int}}$  and  $\Delta E_{\text{dist}}$  exhibit a tendency to decrease gradually, but  $\Delta E_{\text{[sub-opt]}}$  tends to significantly increase. When the larger conjugation effect exists, it is natural that the interaction between Rh catalyst and the conjugated substrate becomes weaker, and the para carbanion is more stabilized rather than meta carbanion. But it's noteworthy that  $\Delta E_{\text{[sub-opt]}}$  overwhelms the other terms such as  $E_{\text{dist[cat]}}$ ,  $E_{\text{dist[sub]}}$ , and  $\Delta E_{\text{int}}$ , leading to larger  $\Delta E_{\text{tot}}$ . Consequently, the analysis can provide insight into how the delocalized effect of conjugated substrate units in an intermediate can affect the kinetic preference of 2<sup>nd</sup> regioselective hydroboration.

## VII-6. Consideration of the rhodaboration pathway for 1,2-dihydropyridine

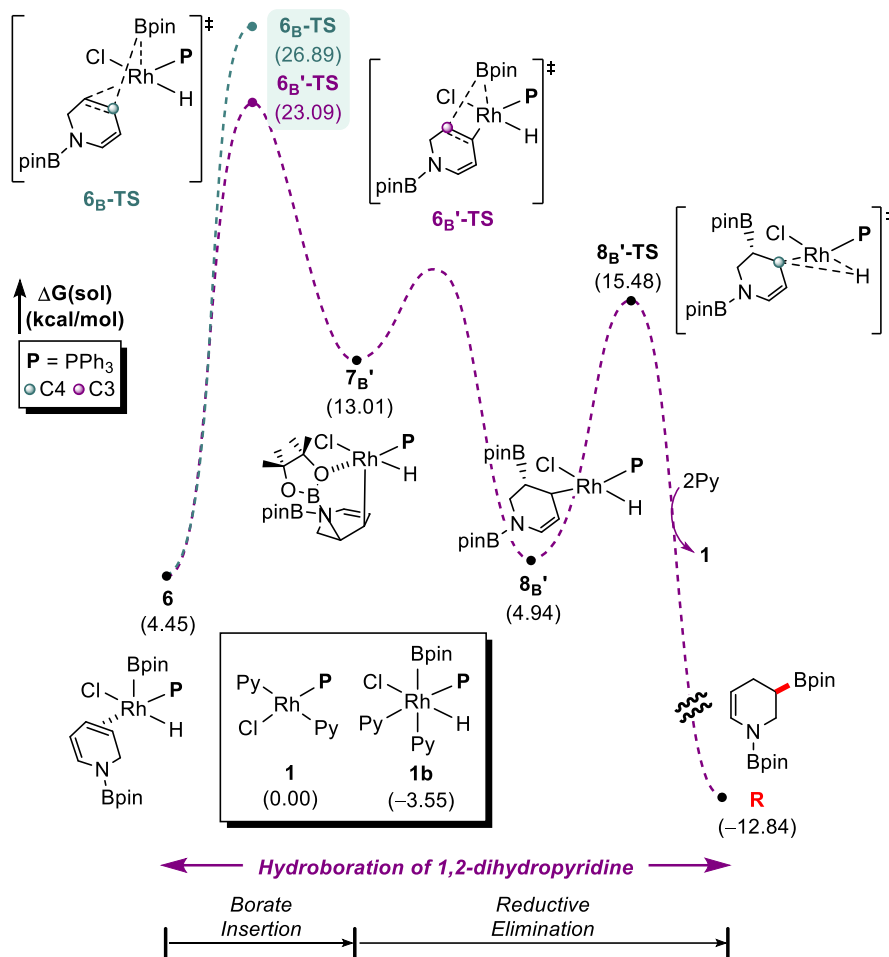

Fig. S28 The DFT-calculated energy profile for the 2<sup>nd</sup>-hydroboration via rhodaboration.

## VII-7. Hydroboration of N-boryl-1,4-dihydropyridine

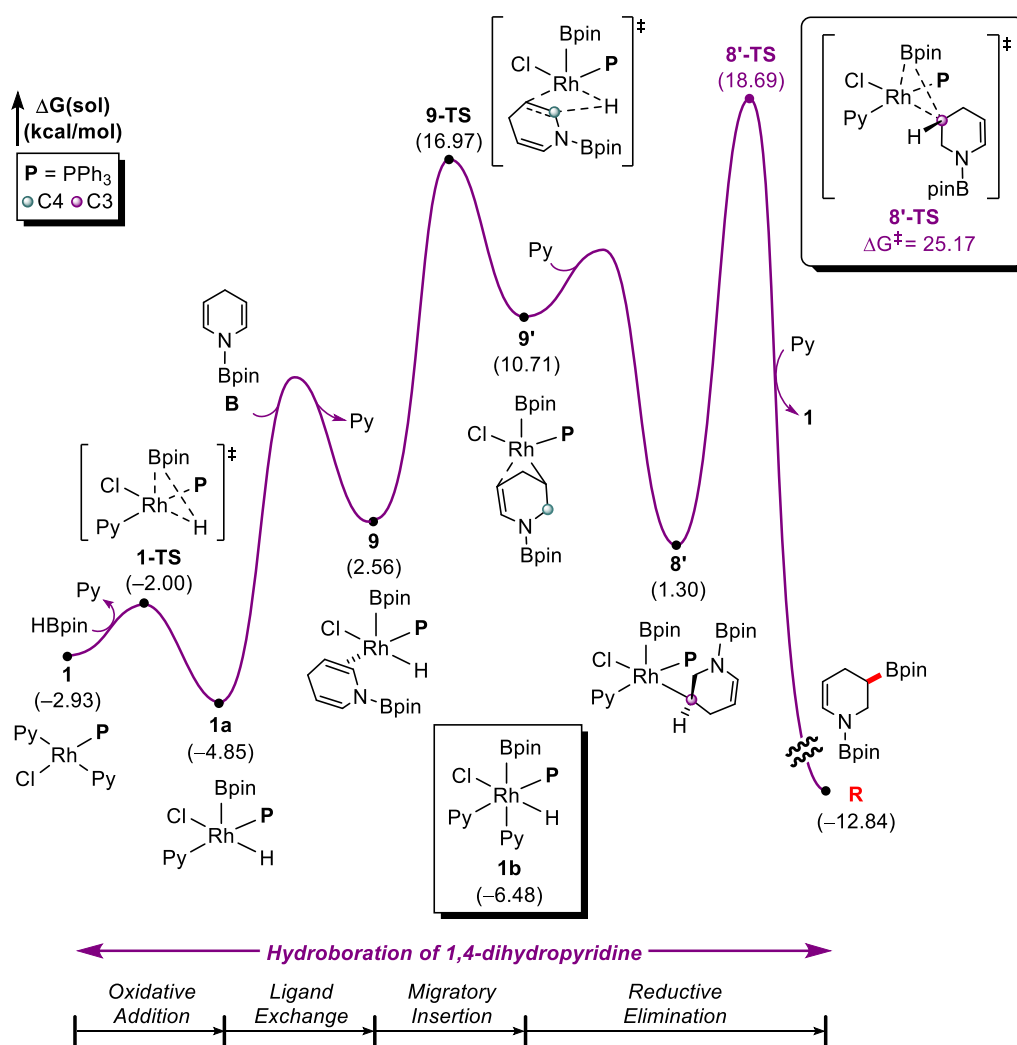

Fig. S29 The DFT-calculated energy profile for the 2<sup>nd</sup>-hydroboration of 1,4-dihydropyridine.



## VII-8. Cartesian coordinates of DFT-optimized structures

### Pyridine

|   |              |              |              |
|---|--------------|--------------|--------------|
| C | -1.182272548 | 0.000000000  | -3.068317780 |
| C | -1.182272548 | 1.198347000  | -2.355873780 |
| C | -1.182272548 | 1.142246000  | -0.961077780 |
| N | -1.182272548 | 0.000000000  | -0.262047780 |
| C | -1.182272548 | -1.142246000 | -0.961077780 |
| C | -1.182272548 | -1.198347000 | -2.355873780 |
| H | -1.182272548 | 0.000000000  | -4.15459780  |
| H | -1.182272548 | 2.157005000  | -2.865090780 |
| H | -1.182272548 | 2.060344000  | -0.375913780 |
| H | -1.182272548 | -2.060344000 | -0.375913780 |
| H | -1.182272548 | -2.157005000 | -2.865090780 |

### HBpin

|   |              |              |              |
|---|--------------|--------------|--------------|
| C | -0.458686154 | -1.225304200 | -3.500716814 |
| O | 0.594690176  | -1.432520685 | -2.514289217 |
| B | 0.056390650  | -1.159940234 | -1.286727732 |
| O | -1.299500161 | -0.979818388 | -1.303698834 |
| C | -1.766647345 | -1.359577226 | -2.631496170 |
| H | 0.707146594  | -1.085606300 | -0.294928645 |
| C | -2.274208612 | -2.801857126 | -2.517930419 |
| H | -2.702287513 | -3.153250199 | -3.461282264 |
| H | -1.467858239 | -3.479630234 | -2.224632596 |
| H | -3.048076634 | -2.843847407 | -1.747117545 |
| C | -0.305082538 | -2.267294032 | -4.605031034 |
| H | 0.635307856  | -2.101683892 | -5.137934759 |
| H | -0.289919384 | -3.281037426 | -4.202277606 |
| H | -1.125420485 | -2.187325967 | -5.325932472 |
| C | -0.250963511 | 0.183495484  | -4.067496186 |
| H | 0.761685814  | 0.254966396  | -4.472799101 |
| H | -0.963565920 | 0.403749517  | -4.867684549 |
| H | -0.356894712 | 0.940522844  | -3.285421160 |
| C | -2.906756230 | -0.427668046 | -3.031372566 |
| H | -3.231075722 | -0.633615553 | -4.056827410 |
| H | -3.759710160 | -0.584919951 | -2.365402816 |
| H | -2.612794000 | 0.620479822  | -2.960205788 |

### A

|   |              |              |              |
|---|--------------|--------------|--------------|
| C | -0.882350336 | 0.097695754  | -3.185067169 |
| O | 0.101296033  | -0.607629440 | -2.380781095 |
| B | -0.350796829 | -0.545081737 | -1.078716643 |
| O | -1.644373275 | -0.077279200 | -0.962782151 |
| C | -2.185074788 | -0.045239528 | -2.311387308 |
| C | -2.910791523 | -1.377628694 | -2.535181825 |
| H | -3.411392370 | -1.406598927 | -3.507524788 |
| H | -2.212541332 | -2.217433715 | -2.476577324 |
| H | -3.663014363 | -1.505310560 | -1.752204248 |
| C | -0.949626443 | -0.560820420 | -4.558696987 |
| H | -0.001412699 | -0.414271432 | -5.083678084 |
| H | -1.128042422 | -1.634190204 | -4.478246570 |
| H | -1.747125556 | -0.114292480 | -5.161698581 |
| C | -0.401902395 | 1.548993475  | -3.308686563 |
| H | 0.607906369  | 1.551274212  | -3.727543506 |

|   |              |              |              |
|---|--------------|--------------|--------------|
| H | -1.052584312 | 2.135271330  | -3.964262326 |
| H | -0.364604402 | 2.033045453  | -2.328678682 |
| C | -3.164018595 | 1.119187446  | -2.417529357 |
| H | -3.518771147 | 1.231339720  | -3.447452139 |
| H | -4.030077732 | 0.932129880  | -1.776418868 |
| H | -2.705147717 | 2.056353158  | -2.099161720 |
| C | 2.199528810  | -0.854551974 | 2.199393332  |
| C | 2.716579928  | -1.036937131 | 0.973134830  |
| C | 1.811345980  | -1.458253112 | -0.160900936 |
| N | 0.443559300  | -0.935367005 | 0.032056876  |
| C | -0.056746319 | -0.912699850 | 1.334029403  |
| C | 0.759349474  | -0.936205721 | 2.409486951  |
| H | 2.839320240  | -0.598618009 | 3.040311036  |
| H | 3.778081626  | -0.923563788 | 0.774043102  |
| H | 1.774224191  | -2.561486754 | -0.224284223 |
| H | -1.135763996 | -0.826779617 | 1.410925668  |
| H | 0.340472497  | -0.914416840 | 3.408623715  |
| H | 2.177075987  | -1.100345601 | -1.126317892 |

### B

|   |              |              |              |
|---|--------------|--------------|--------------|
| C | -0.896978472 | 0.118282482  | -3.208446220 |
| O | 0.157702329  | -0.442492589 | -2.380786166 |
| B | -0.298878803 | -0.390889128 | -1.081392594 |
| O | -1.632741960 | -0.060597405 | -0.974725720 |
| C | -2.178394369 | -0.119005956 | -2.319615080 |
| C | -2.779226629 | -1.518922725 | -2.498339257 |
| H | -3.286058244 | -1.620690195 | -3.462386647 |
| H | -2.006422045 | -2.289358106 | -2.424628876 |
| H | -3.508520875 | -1.692543781 | -1.702607300 |
| C | -0.901148932 | -0.607303635 | -4.550605218 |
| H | 0.027653444  | -0.392513641 | -5.086602592 |
| H | -0.974441583 | -1.688574436 | -4.422940620 |
| H | -1.738682909 | -0.267354368 | -5.168226695 |
| C | -0.571382265 | 1.604197524  | -3.405569853 |
| H | 0.436102062  | 1.692409050  | -3.820739294 |
| H | -1.273660641 | 2.084890242  | -4.092576404 |
| H | -0.593824650 | 2.138280911  | -2.451200928 |
| C | -3.261173609 | 0.947196030  | -2.452596503 |
| H | -3.636004897 | 0.987158584  | -3.480716566 |
| H | -4.099128794 | 0.705092242  | -1.793071940 |
| H | -2.888280987 | 1.934437880  | -2.175161935 |
| C | 2.255665462  | -1.133862935 | 2.381704097  |
| C | 2.726031616  | -1.125098643 | 0.946394561  |
| C | 1.912719890  | -0.895534149 | -0.090286558 |
| N | 0.532480422  | -0.647716205 | 0.048703050  |
| C | 0.018588494  | -0.644982216 | 1.360771080  |
| C | 0.770879516  | -0.863224329 | 2.444879089  |
| H | 2.492816375  | -2.098969637 | 2.860920078  |
| H | 3.778277329  | -1.303505789 | 0.745923384  |
| H | -1.046177330 | -0.451407672 | 1.420370505  |
| H | 0.289950037  | -0.843603957 | 3.418270045  |
| H | 2.263592136  | -0.890722159 | -1.115857702 |
| H | 2.810013836  | -0.386196356 | 2.974361056  |

### G

|   |              |              |              |
|---|--------------|--------------|--------------|
| C | -1.438718048 | -0.110995815 | -3.302257267 |
|---|--------------|--------------|--------------|

O -0.206291640 -0.509528790 -2.647254173  
 B -0.476137299 -0.536575140 -1.290880206  
 O -1.822211731 -0.408104614 -0.998203311  
 C -2.531100076 -0.549739388 -2.254577078  
 C -2.926995767 -2.026329257 -2.384528699  
 H -3.535047654 -2.206484701 -3.276183851  
 H -2.040824158 -2.665719744 -2.430030816  
 H -3.507439391 -2.313159206 -1.503535356  
 C -1.524852033 -0.815553107 -4.652436412  
 H -0.727529843 -0.454935874 -5.308526522  
 C 2.576293858 -0.561842531 1.811506884  
 C 2.793226064 0.004226025 0.392608803  
 C 1.948439785 -0.757310734 -0.635593339  
 N 0.521561671 -0.689915388 -0.298915991  
 C 0.195036633 -0.799971542 1.059934341  
 C 1.096669473 -0.796275829 2.052175264  
 H 3.108748786 -1.526748921 1.897738256  
 H 3.850389248 -0.046154778 0.111636306  
 H 2.266680982 -1.809921294 -0.654709639  
 H -0.868633128 -0.893031821 1.254452478  
 H 0.752909557 -0.922882519 3.073567084  
 H 2.083261152 -0.355548230 -1.642603667  
 C 3.310818762 1.345236915 4.997024134  
 O 2.892045376 0.151112341 4.281548753  
 C 4.390408165 1.947400790 4.025278665  
 C 3.829166489 0.939336460 6.372902744  
 C 2.067034265 2.232338617 5.137103717  
 B 3.151550631 0.366316026 2.946948607  
 O 3.927904458 1.477685449 2.726228164  
 C 5.787243906 1.351396065 4.236550581  
 C 4.458972764 3.470238735 3.996405561  
 H 6.242229166 1.710508454 5.164557515  
 H 5.744480076 0.259069063 4.268082885  
 H 6.426698494 1.642654567 3.399125780  
 H 3.009373988 0.524293718 6.966031348  
 H 4.609540049 0.180415402 6.299688325  
 H 4.230772856 1.807854236 6.905637877  
 H 1.281802759 1.661152359 5.639343547  
 H 2.276227060 3.130854467 5.725416149  
 H 1.689249848 2.534841276 4.156389744  
 H 4.719683058 3.863254162 4.984817660  
 H 5.227278293 3.791032972 3.287417716  
 H 3.508874829 3.906713554 3.684726806  
 H 2.509652685 1.062868453 0.372499882

**R**

C -0.375610820 -0.164293763 -3.097782382  
 O 0.133626294 -1.181072440 -2.199178618  
 B 0.091684779 -0.643369802 -0.927864429  
 O -0.605803516 0.548707921 -0.856854534  
 C -1.261204934 0.723946706 -2.138917370  
 C -2.694132817 0.200076249 -1.985363856  
 H -3.281734536 0.354678513 -2.895346152  
 H -2.695005311 -0.866647905 -1.744589245  
 H -3.178708263 0.734125026 -1.163624920  
 C -1.142342381 -0.847333341 -4.226742181  
 H -0.452715686 -1.445487538 -4.828927890

H -1.411501705 -1.895554381 -4.546326564  
 H -2.485743025 -0.607707687 -5.135011618  
 C -1.372699390 1.409277957 -3.495954346  
 H -0.465721530 1.653851272 -4.055380079  
 H -2.237120138 1.784842094 -4.051799199  
 H -1.326377678 1.923061041 -2.531588433  
 C -3.777036777 0.330046948 -2.214847428  
 H -4.289155031 0.319143004 -3.182887209  
 H -4.470166838 -0.047568668 -1.457630471  
 H -3.529202514 1.361406711 -1.959475028  
 H -1.916466721 -1.512393381 -3.841042263  
 H -1.610296094 -0.103538709 -4.880511074  
 C 0.840783149 0.580838708 -3.657748153  
 H 1.502750207 -0.141950351 -4.141661086  
 H 0.552376654 1.339407946 -4.391439120  
 H 1.402863720 1.059242854 -2.854631544  
 C -1.274172224 2.212220129 -2.477368269  
 H -1.680379929 2.377037813 -3.481016622  
 H -1.903326248 2.749137162 -1.761723650  
 H -0.271018377 2.639414565 -2.431169180  
 C 2.481330203 -2.006719928 2.406177100  
 C 2.940254204 -1.995222267 0.930471754  
 C 1.725452391 -2.296196314 0.027150189  
 N 0.713318442 -1.245810103 0.192410630  
 C 0.491653960 -0.795163962 1.501549264  
 C 1.243661712 -1.153617202 2.554552716  
 H 2.290645566 -3.036126154 2.745122812  
 H 3.689603163 -2.781535070 0.765061831  
 H 1.291236956 -3.269371374 0.295868630  
 H -0.343738618 -0.108686672 1.598850592  
 H 0.975698831 -0.774253396 3.535592060  
 H 2.009525209 -2.329225488 -1.025774875  
 C 4.306468527 1.169529510 -0.689737139  
 O 3.543414924 -0.070399799 -0.725081658  
 C 4.200009220 1.572912934 0.823575235  
 C 3.687115593 2.167032838 -1.661853030  
 C 5.735649059 0.820529653 -1.121356532  
 B 3.553536655 -0.588027975 0.551692433  
 O 4.098924381 0.274912835 1.471193104  
 C 2.905131770 2.329116946 1.151659125  
 C 5.409659071 2.310927201 1.384721705  
 H 2.938447898 3.358716466 0.782248964  
 H 2.032930120 1.827099351 0.723593991  
 H 2.777590900 2.350861687 2.236962624  
 H 3.762236943 1.783916016 -2.683282583  
 H 2.633670650 2.342098402 -1.439744264  
 H 4.216431796 3.124476270 -1.614706659  
 H 5.701141901 0.339354820 -2.102477139  
 H 6.365835870 1.712082800 -1.191668774  
 H 6.194720223 0.122276842 -0.415766081  
 H 5.565643806 3.255607296 0.853006967  
 H 5.244023665 2.537255475 2.441631807  
 H 6.316757454 1.709459377 1.305843500  
 H 3.276783747 -1.612817778 3.048805514

**I**

Rh -2.507306991 0.628767140 2.097502739

|    |              |              |              |
|----|--------------|--------------|--------------|
| Cl | -3.492277783 | 2.436259840  | 0.791300188  |
| P  | -1.474152836 | -1.009643483 | 3.253536873  |
| C  | -1.002390435 | 4.277648311  | 4.932908890  |
| C  | -1.901625252 | 3.334222143  | 5.424822120  |
| C  | -2.271224672 | 2.267657627  | 4.612676656  |
| N  | -1.799571052 | 2.114996386  | 3.360413725  |
| C  | -0.946845378 | 3.040682958  | 2.875151574  |
| C  | -0.518566180 | 4.124022707  | 3.633822801  |
| H  | -0.687925165 | 5.117191468  | 5.546085696  |
| H  | -2.308617091 | 3.406214488  | 6.427667514  |
| H  | -2.947129119 | 1.497127144  | 4.961755783  |
| H  | -0.634378578 | 2.897417728  | 1.848649793  |
| H  | 0.174120176  | 4.837944343  | 3.200707952  |
| C  | -4.797200440 | -2.542540731 | -0.832569448 |
| C  | -5.450272503 | -1.464944221 | -0.237289249 |
| C  | -4.725260916 | -0.580117899 | 0.553332074  |
| N  | -3.402661598 | -0.731399008 | 0.783728239  |
| C  | -2.771200718 | -1.764701241 | 0.189138155  |
| C  | -3.427656567 | -2.685092227 | -0.619524046 |
| H  | -5.340845787 | -3.250832456 | -1.450894126 |
| H  | -6.513116343 | -1.299483269 | -0.379784104 |
| H  | -5.183077900 | 0.288051904  | 1.009798164  |
| H  | -1.710458058 | -1.857218620 | 0.385487363  |
| H  | -2.865779319 | -3.500325852 | -1.063209434 |
| C  | 0.218493285  | -1.465806069 | 2.659269970  |
| C  | 1.091181852  | -2.271848339 | 3.410036619  |
| C  | 0.649966845  | -0.973463535 | 1.419275049  |
| C  | 2.353307782  | -2.599495383 | 2.917258981  |
| C  | 1.914229290  | -1.303194648 | 0.925593862  |
| C  | 2.764971792  | -2.119795546 | 1.670787998  |
| H  | 0.785942820  | -2.631185767 | 4.388846745  |
| H  | -0.009074468 | -0.310515875 | 0.861742890  |
| H  | 3.018628107  | -3.223776876 | 3.507794334  |
| H  | 2.235790788  | -0.913342236 | -0.036313809 |
| H  | 3.750263615  | -2.373669738 | 1.289241140  |
| C  | -1.127509354 | -0.706925618 | 5.043558901  |
| C  | -1.970478703 | -1.175901018 | 6.060721261  |
| C  | -0.049325861 | 0.124113434  | 5.390244053  |
| C  | -1.738385127 | -0.823824724 | 7.391904621  |
| C  | 0.181626343  | 0.473556689  | 6.719069188  |
| C  | -0.663383495 | 0.001109218  | 7.725431118  |
| H  | -2.807303460 | -1.823277473 | 5.817670717  |
| H  | 0.608262936  | 0.505746418  | 4.614497932  |
| H  | -2.397024059 | -1.201544765 | 8.169470362  |
| H  | 1.019770018  | 1.118935915  | 6.967586165  |
| H  | -0.483916640 | 0.272534867  | 8.762154985  |
| C  | -2.393603958 | -2.615715024 | 3.272300231  |
| C  | -3.787784002 | -2.535790628 | 3.429209843  |
| C  | -1.806965421 | -3.876832129 | 3.101872365  |
| C  | -4.572143885 | -3.687699844 | 3.434654719  |
| C  | -2.595090842 | -5.029370934 | 3.095761210  |
| C  | -3.976788199 | -4.939512040 | 3.265046479  |
| H  | -4.252626736 | -1.557268242 | 3.517187726  |
| H  | -0.736328535 | -3.967100936 | 2.953944742  |
| H  | -5.648968843 | -3.606103226 | 3.555259677  |
| H  | -2.125939855 | -5.999467793 | 2.953903231  |
| H  | -4.587319753 | -5.838397254 | 3.257538443  |

### I-TS

|    |              |              |              |
|----|--------------|--------------|--------------|
| Rh | -0.510684396 | 1.325648243  | 3.623955665  |
| Cl | 0.920098667  | 1.641881767  | 5.559270624  |
| H  | -1.393207605 | 1.193155995  | 2.277171964  |
| P  | -0.493992878 | -0.961531838 | 3.926656821  |
| C  | -0.400594668 | 6.194974602  | 2.813581697  |
| C  | -0.311706756 | 5.295418541  | 1.751745723  |
| C  | -0.334876009 | 3.931877028  | 2.024215130  |
| N  | -0.427178922 | 3.448170385  | 3.276208778  |
| C  | -0.510582452 | 4.314023779  | 4.300873313  |
| C  | -0.503645910 | 5.692079830  | 4.108733375  |
| H  | -0.389434086 | 7.266261820  | 2.634080458  |
| H  | -0.229026433 | 5.637541621  | 0.725460355  |
| H  | -0.282595766 | 3.192949637  | 1.232605784  |
| H  | -0.561869180 | 3.870197951  | 5.287566713  |
| H  | -0.574102475 | 6.351560470  | 4.967510138  |
| C  | -4.721370186 | 0.829537912  | 3.628413636  |
| O  | -3.370339005 | 0.314972073  | 3.510428889  |
| C  | -4.462763196 | 2.268712409  | 4.197521233  |
| C  | -5.508433987 | -0.102541257 | 4.544249752  |
| C  | -5.321181489 | 0.842855336  | 2.217742313  |
| B  | -2.495962476 | 1.390479423  | 3.458999010  |
| O  | -3.171784188 | 2.593825675  | 3.614397892  |
| C  | -4.279881199 | 2.276955517  | 5.721771857  |
| C  | -5.472181119 | 3.329137926  | 3.772847185  |
| H  | -5.228929834 | 2.114850956  | 6.242277989  |
| H  | -3.572049254 | 1.504777111  | 6.035841375  |
| H  | -3.879228923 | 3.249166232  | 6.022427011  |
| H  | -5.638016340 | -1.073581456 | 4.057504967  |
| H  | -4.979514467 | -0.273840949 | 5.482653057  |
| H  | -6.500090637 | 0.310719366  | 4.758423476  |
| H  | -5.269764690 | -0.167230359 | 1.800515491  |
| H  | -6.368791677 | 1.159399791  | 2.227542769  |
| H  | -4.757296892 | 1.513819205  | 1.563342676  |
| H  | -6.477230428 | 3.067093849  | 4.120962053  |
| H  | -5.198997005 | 4.292489977  | 4.213345817  |
| H  | -5.495344779 | 3.447709198  | 2.688112608  |
| C  | -0.814403398 | -2.008973631 | 2.438308923  |
| C  | -1.921060139 | -1.734529850 | 1.616724046  |
| C  | 0.032572495  | -3.074375158 | 2.096750360  |
| C  | -2.171926389 | -2.511558284 | 0.487195686  |
| C  | -0.220337036 | -3.845464466 | 0.959911693  |
| C  | -1.321862516 | -3.568248160 | 0.151131198  |
| H  | -2.591165830 | -0.924118128 | 1.874845797  |
| H  | 0.892692662  | -3.306037406 | 2.715080945  |
| H  | -3.034708770 | -2.287155735 | -0.134669448 |
| H  | 0.449262849  | -4.663923693 | 0.709771426  |
| H  | -1.516511043 | -4.168117072 | -0.733602141 |
| C  | 1.106855849  | -1.615608747 | 4.544395890  |
| C  | 2.298551700  | -1.057986217 | 4.060844408  |
| C  | 1.166407063  | -2.682997987 | 5.450035649  |
| C  | 3.529275052  | -1.567235140 | 4.468600902  |
| C  | 2.401233144  | -3.186128984 | 5.862879804  |
| C  | 3.583136931  | -2.631917266 | 5.370969845  |
| H  | 2.260552595  | -0.209080280 | 3.385504695  |
| H  | 0.251347660  | -3.118000497 | 5.839382668  |
| H  | 4.446728767  | -1.122102363 | 4.094357583  |

|   |              |              |             |
|---|--------------|--------------|-------------|
| H | 2.436934127  | -4.009027911 | 6.571716575 |
| H | 4.543789197  | -3.022271412 | 5.695934742 |
| C | -1.696355012 | -1.538695785 | 5.189287020 |
| C | -1.767002887 | -0.813501459 | 6.389336457 |
| C | -2.523806921 | -2.650964268 | 5.001832643 |
| C | -2.661564059 | -1.202012223 | 7.385418534 |
| C | -3.421240196 | -3.032090322 | 6.001674262 |
| C | -3.493428786 | -2.308956594 | 7.192752002 |
| H | -1.121409206 | 0.049479932  | 6.532374994 |
| H | -2.479338832 | -3.211523620 | 4.073325164 |
| H | -2.711292984 | -0.637070333 | 8.312422139 |
| H | -4.066205732 | -3.892895301 | 5.846367029 |
| H | -4.194231523 | -2.605906223 | 7.968481057 |

**1a**

|    |              |              |              |
|----|--------------|--------------|--------------|
| Rh | 0.874051663  | -0.842341153 | 0.119246677  |
| Cl | 0.984695373  | -1.190115741 | 2.564394031  |
| H  | 0.781228766  | -0.867919449 | -1.443174321 |
| P  | -1.388044050 | -0.489033979 | 0.166010160  |
| C  | 5.741495201  | -1.535614172 | -0.381067838 |
| C  | 4.868320034  | -1.879570541 | -1.411937775 |
| C  | 3.501639532  | -1.716097425 | -1.216672400 |
| N  | 2.986540849  | -1.252814708 | -0.062423731 |
| C  | 3.828189471  | -0.926005770 | 0.935680197  |
| C  | 5.208747855  | -1.050997101 | 0.811336904  |
| H  | 6.815263061  | -1.643314294 | -0.505947283 |
| H  | 5.234101432  | -2.262199289 | -2.359117210 |
| H  | 2.786256710  | -1.949374056 | -1.995818453 |
| H  | 3.357308557  | -0.580621201 | 1.848936178  |
| H  | 5.847196460  | -0.772037371 | 1.643063737  |
| C  | 2.400319967  | 2.867468753  | -1.062319939 |
| O  | 2.401287657  | 1.413082183  | -1.090523967 |
| C  | 0.865183388  | 3.192446907  | -1.071411112 |
| C  | 3.177984223  | 3.380942627  | -2.268832618 |
| C  | 3.091289890  | 3.285430874  | 0.241817104  |
| B  | 1.210975451  | 0.994917296  | -0.522352151 |
| O  | 0.321888098  | 2.043831698  | -0.365501760 |
| C  | 0.253991734  | 3.183503905  | -2.477446580 |
| C  | 0.460933865  | 4.456089038  | -0.319711342 |
| H  | 0.558030325  | 4.063517786  | -3.053225001 |
| H  | 0.549250780  | 2.284261243  | -3.024314338 |
| H  | -0.835338955 | 3.176496843  | -2.391461527 |
| H  | 4.229702626  | 3.093839604  | -2.177999702 |
| H  | 2.791325708  | 2.962274515  | -3.199505411 |
| H  | 3.124808776  | 4.473580141  | -2.325278676 |
| H  | 4.087247645  | 2.834753819  | 0.272329840  |
| H  | 3.197110421  | 4.372151480  | 0.315396809  |
| H  | 2.530942599  | 2.927065887  | 1.110132397  |
| H  | 0.922643953  | 5.340334646  | -0.772350194 |
| H  | -0.625580617 | 4.574922717  | -0.364611445 |
| H  | 0.751462202  | 4.407037178  | 0.731227727  |
| C  | -2.112330701 | 0.378803498  | -1.286214185 |
| C  | -1.728612010 | -0.017493675 | -2.576121506 |
| C  | -3.039154584 | 1.418340726  | -1.142970132 |
| C  | -2.267162680 | 0.607317675  | -3.698687043 |
| C  | -3.571594960 | 2.049310502  | -2.269228430 |
| C  | -3.189214287 | 1.645963621  | -3.548520115 |

|   |              |              |              |
|---|--------------|--------------|--------------|
| H | -1.000427320 | -0.813485334 | -2.698161992 |
| H | -3.342456897 | 1.742202360  | -0.153373003 |
| H | -1.960558759 | 0.288711226  | -4.691236283 |
| H | -4.284670261 | 2.859463274  | -2.142893936 |
| H | -3.602359804 | 2.139831167  | -4.423753327 |
| C | -2.229335937 | -2.124851367 | 0.170188736  |
| C | -1.813224970 | -3.066550454 | 1.127710363  |
| C | -3.238131347 | -2.467628053 | -0.741185110 |
| C | -2.400007607 | -4.330188828 | 1.162681565  |
| C | -3.818501033 | -3.736587561 | -0.700345337 |
| C | -3.399808019 | -4.669581769 | 0.248113397  |
| H | -1.032864252 | -2.803995169 | 1.838142443  |
| H | -3.570937876 | -1.749225966 | -1.483146028 |
| H | -2.070711123 | -5.052154602 | 1.904715147  |
| H | -4.597329565 | -3.994296473 | -1.413075736 |
| H | -3.849654337 | -5.658411968 | 0.273670811  |
| C | -2.096354898 | 0.380508467  | 1.614926784  |
| C | -3.385798238 | 0.078744955  | 2.076876633  |
| C | -1.349440388 | 1.378219130  | 2.255541706  |
| C | -3.926267857 | 0.775650378  | 3.157748914  |
| C | -1.895599047 | 2.072783991  | 3.334015704  |
| C | -3.182567849 | 1.775726583  | 3.786999377  |
| H | -3.965336142 | -0.704272789 | 1.596370422  |
| H | -0.347985976 | 1.599336259  | 1.910738412  |
| H | -4.924674928 | 0.532276086  | 3.510616031  |
| H | -1.307776630 | 2.840490793  | 3.829346519  |
| H | -3.601336833 | 2.315110877  | 4.632226231  |

**1b**

|    |              |              |              |
|----|--------------|--------------|--------------|
| Rh | -2.631018906 | 0.621091099  | 2.049808629  |
| Cl | -4.405683180 | 0.723684632  | 3.858250280  |
| H  | -1.545311462 | 0.620474335  | 0.926501213  |
| P  | -1.667804280 | -1.263094105 | 2.922025621  |
| C  | 0.133127243  | 4.074565029  | 4.754203702  |
| C  | 0.765472391  | 3.209995295  | 3.860588063  |
| C  | -0.011822944 | 2.290656018  | 3.162021861  |
| N  | -1.341245999 | 2.195382865  | 3.317075032  |
| C  | -1.948487509 | 3.026799313  | 4.178470190  |
| C  | -1.248711870 | 3.982358670  | 4.913490087  |
| H  | 0.710227046  | 4.802529888  | 5.317893543  |
| H  | 1.840091258  | 3.236817232  | 3.711159417  |
| H  | 0.433816950  | 1.584955189  | 2.468024045  |
| H  | -3.020304668 | 2.881712576  | 4.283879655  |
| H  | -1.781633648 | 4.631516872  | 5.601379320  |
| C  | -4.583971699 | 4.656191012  | -0.031563340 |
| C  | -5.401526712 | 3.695382175  | 0.558641711  |
| C  | -4.819618860 | 2.568730191  | 1.133439653  |
| N  | -3.488358600 | 2.378866576  | 1.140966931  |
| C  | -2.697770837 | 3.303403352  | 0.567461206  |
| C  | -3.203574339 | 4.454748859  | -0.025454598 |
| H  | -5.011879863 | 5.544425435  | -0.488081987 |
| H  | -6.480590024 | 3.808404869  | 0.580578408  |
| H  | -5.404930493 | 1.798996825  | 1.620242047  |
| H  | -1.633908978 | 3.100289807  | 0.599331983  |
| H  | -2.524103535 | 5.173162566  | -0.472534755 |
| C  | -4.993789469 | -1.132503933 | -0.987971550 |
| O  | -4.306604159 | -0.017861104 | -0.361035095 |

|   |              |              |              |
|---|--------------|--------------|--------------|
| C | -4.056600808 | -2.338851891 | -0.630898531 |
| C | -5.139571765 | -0.843700742 | -2.478369964 |
| C | -6.373323189 | -1.233758541 | -0.324342920 |
| B | -3.547853203 | -0.522115987 | 0.688982058  |
| O | -3.509084215 | -1.910937931 | 0.638967039  |
| C | -2.872118245 | -2.493976410 | -1.593932234 |
| C | -4.759443879 | -3.677682494 | -0.427381737 |
| H | -3.188261043 | -2.888986367 | -2.565031968 |
| H | -2.372195730 | -1.533933470 | -1.748987740 |
| H | -2.145930336 | -3.181561212 | -1.151552193 |
| H | -5.798013098 | 0.017980499  | -2.624082872 |
| H | -4.175448700 | -0.613075018 | -2.934696773 |
| H | -5.579221808 | -1.702079953 | -2.998428089 |
| H | -6.890369773 | -0.276783054 | -0.439186804 |
| H | -6.987168878 | -2.018280110 | -0.777877839 |
| H | -6.275384038 | -1.436855838 | 0.745829128  |
| H | -5.267572434 | -3.995468441 | -1.344630014 |
| H | -4.020319092 | -4.439498878 | -0.161876360 |
| H | -5.491126273 | -3.624929561 | 0.381052227  |
| C | -0.688074158 | -2.294934828 | 1.743101562  |
| C | -0.746248086 | -3.695569747 | 1.745755579  |
| C | 0.132755459  | -1.658592822 | 0.800333609  |
| C | -0.000119793 | -4.438826407 | 0.828109163  |
| C | 0.884311848  | -2.401709970 | -0.109694558 |
| C | 0.818672415  | -3.797189652 | -0.102566527 |
| H | -1.386318105 | -4.211311343 | 2.452698418  |
| H | 0.162119382  | -0.573937039 | 0.764936857  |
| H | -0.064828592 | -5.523649061 | 0.840500251  |
| H | 1.511845312  | -1.888131714 | -0.833035025 |
| H | 1.395666680  | -4.377316262 | -0.817403972 |
| C | -0.452921767 | -0.791379947 | 4.221552804  |
| C | -0.962926692 | -0.099040974 | 5.334091041  |
| C | 0.923789727  | -1.020262372 | 4.125694227  |
| C | -0.103428014 | 0.356557358  | 6.328280759  |
| C | 1.783567170  | -0.556491030 | 5.126464369  |
| C | 1.273465189  | 0.133315664  | 6.224971299  |
| H | -2.030476861 | 0.100026733  | 5.394948575  |
| H | 1.329784623  | -1.557391827 | 3.274029355  |
| H | -0.506216115 | 0.897212598  | 7.180334531  |
| H | 2.852063064  | -0.738070867 | 5.043644266  |
| H | 1.943746794  | 0.496090105  | 6.999778617  |
| C | -2.715993868 | -2.469169601 | 3.837163229  |
| C | -4.084028680 | -2.590255551 | 3.562891449  |
| C | -2.141976816 | -3.288993864 | 4.823013598  |
| C | -4.856930419 | -3.524302109 | 4.251860864  |
| C | -2.917823191 | -4.222424916 | 5.508960917  |
| C | -4.278600813 | -4.342369805 | 5.222398873  |
| H | -4.540445104 | -1.945427018 | 2.827735432  |
| H | -1.086595459 | -3.193942383 | 5.060407055  |
| H | -5.919258101 | -3.601592616 | 4.036812273  |
| H | -2.460318563 | -4.849726562 | 6.269227339  |
| H | -4.886809721 | -5.064306693 | 5.761286814  |

2

|    |              |             |             |
|----|--------------|-------------|-------------|
| Rh | -2.410247349 | 1.037106749 | 2.475489725 |
| Cl | -4.820832495 | 0.668024897 | 2.380195623 |
| H  | -0.809030365 | 1.307100057 | 2.602115536 |

|   |              |              |              |
|---|--------------|--------------|--------------|
| P | -2.055259942 | -1.195877458 | 2.316423348  |
| C | -3.044609326 | 5.829316169  | 3.662171715  |
| C | -4.085300762 | 5.103623250  | 3.086379646  |
| C | -3.880711277 | 3.766933005  | 2.753390407  |
| N | -2.703715074 | 3.143179135  | 2.960769519  |
| C | -1.694001283 | 3.849828428  | 3.514044636  |
| C | -1.826295980 | 5.185272939  | 3.879162338  |
| H | -3.177931636 | 6.872081698  | 3.936350923  |
| H | -5.053117943 | 5.557217611  | 2.897494236  |
| H | -4.664045453 | 3.146682290  | 2.330203482  |
| H | -0.752607936 | 3.326448322  | 3.628655407  |
| H | -0.982118328 | 5.704444737  | 4.321551322  |
| C | -3.203252536 | 3.167351797  | -1.664841990 |
| C | -2.540103168 | 4.038953419  | -0.801959719 |
| C | -1.616104997 | 3.526875264  | 0.097525584  |
| N | -1.376087367 | 2.202595771  | 0.181500892  |
| C | -1.977731988 | 1.355303917  | -0.683047954 |
| C | -2.896156121 | 1.805881529  | -1.614543555 |
| H | -3.937458790 | 3.542574048  | -2.371215615 |
| H | -2.728018664 | 5.106926660  | -0.820820477 |
| H | -1.056015714 | 4.143674880  | 0.787551097  |
| H | -1.699712391 | 0.316641116  | -0.589994065 |
| H | -3.368291400 | 1.086952379  | -2.274105514 |
| C | 1.905540389  | 2.127387396  | 1.401375285  |
| O | 0.582734241  | 2.661997729  | 1.597768503  |
| C | 1.650855067  | 0.897380035  | 0.447263932  |
| C | 2.455096375  | 1.710591363  | 2.771764036  |
| C | 2.785289299  | 3.224056609  | 0.801238401  |
| B | -0.364033204 | 1.612536854  | 1.323220373  |
| O | 0.333122034  | 0.471778093  | 0.835351018  |
| C | 2.605344479  | -0.279219539 | 0.648219052  |
| C | 1.611175210  | 1.294219852  | -1.038560206 |
| H | 3.645415415  | 0.025590172  | 0.487277119  |
| H | 2.506316532  | -0.699510799 | 1.650680421  |
| H | 2.369929155  | -1.070276465 | -0.071496604 |
| H | 2.415149906  | 2.573257465  | 3.443984009  |
| H | 1.851640105  | 0.910450024  | 3.200864201  |
| H | 3.493009617  | 1.367817075  | 2.709266394  |
| H | 2.916054230  | 4.031346443  | 1.528534355  |
| H | 3.776196856  | 2.833104513  | 0.545149775  |
| H | 2.333968364  | 3.649840928  | -0.097037334 |
| H | 2.607741449  | 1.529388145  | -1.425973960 |
| H | 1.204549634  | 0.455733407  | -1.612321189 |
| H | 0.964104373  | 2.159957453  | -1.202562757 |
| C | -3.198927049 | -2.263298015 | 3.291163694  |
| C | -3.750208697 | -1.750931066 | 4.472418460  |
| C | -3.451348041 | -3.596869515 | 2.940264804  |
| C | -4.532092631 | -2.562927529 | 5.293433530  |
| C | -4.240974616 | -4.404349152 | 3.758414552  |
| C | -4.779980624 | -3.890118986 | 4.939175597  |
| H | -3.584067757 | -0.709193126 | 4.727059484  |
| H | -3.044001357 | -4.005773192 | 2.020411729  |
| H | -4.959585936 | -2.152411416 | 6.204158213  |
| H | -4.435855696 | -5.434640969 | 3.472085027  |
| H | -5.395511488 | -4.519752326 | 5.576281753  |
| C | -0.441050699 | -1.859954768 | 2.918749138  |
| C | 0.290773164  | -1.111055910 | 3.847323503  |
| C | 0.018541886  | -3.140219867 | 2.573494288  |

|   |              |              |              |
|---|--------------|--------------|--------------|
| C | 1.472069932  | -1.614164943 | 4.395854250  |
| C | 1.204995383  | -3.638457384 | 3.110909093  |
| C | 1.939520143  | -2.874648094 | 4.021180157  |
| H | -0.073360323 | -0.128972827 | 4.134788903  |
| H | -0.547130982 | -3.752728275 | 1.878534501  |
| H | 2.029709014  | -1.015507205 | 5.111168798  |
| H | 1.553375878  | -4.626580423 | 2.821892261  |
| H | 2.863222784  | -3.263729535 | 4.440942479  |
| C | -2.242386736 | -1.847426842 | 0.607153220  |
| C | -1.153368240 | -2.104039519 | -0.240056603 |
| C | -3.546139083 | -1.918617540 | 0.085710792  |
| C | -1.366951706 | -2.444525571 | -1.577865857 |
| C | -3.752818920 | -2.263594211 | -1.248806703 |
| C | -2.664485441 | -2.529472419 | -2.085119240 |
| H | -0.142703241 | -1.998853769 | 0.134905947  |
| H | -4.390493884 | -1.673405251 | 0.723667075  |
| H | -0.515057068 | -2.639560867 | -2.224390490 |
| H | -4.766251535 | -2.318921512 | -1.637499783 |
| H | -2.827630906 | -2.796604762 | -3.125990486 |

[Py]

|   |              |              |              |
|---|--------------|--------------|--------------|
| C | -1.935578950 | 0.000000000  | 0.136389871  |
| C | -2.094006468 | 1.190816204  | 0.844118472  |
| C | -1.758049725 | -1.188425961 | 0.848124753  |
| H | -1.939007950 | -0.001264079 | -0.949336109 |
| C | -2.097243586 | 1.157554188  | 2.231185027  |
| H | -2.211198659 | 2.141209511  | 0.334949189  |
| N | -1.990573545 | -0.004568832 | 2.906809243  |
| H | -2.203211455 | 2.042012891  | 2.845009589  |
| C | -1.788157791 | -1.157668735 | 2.231003859  |
| H | -1.661569479 | -2.040235631 | 2.839136584  |
| H | -1.612770841 | -2.139429556 | 0.348846243  |

[Cat]

|    |              |              |             |
|----|--------------|--------------|-------------|
| Rh | -2.410247349 | 1.037106749  | 2.475489725 |
| Cl | -4.820832495 | 0.668024897  | 2.380195623 |
| H  | -0.809030365 | 1.307100057  | 2.602115536 |
| P  | -2.055259942 | -1.195877458 | 2.316423348 |
| C  | -3.044609326 | 5.829316169  | 3.662171715 |
| C  | -4.085300762 | 5.103623250  | 3.086379646 |
| C  | -3.880711277 | 3.766933005  | 2.753390407 |
| N  | -2.703715074 | 3.143179135  | 2.960769519 |
| C  | -1.694001283 | 3.849828428  | 3.514044636 |
| C  | -1.826295980 | 5.185272939  | 3.879162338 |
| H  | -3.177931636 | 6.872081698  | 3.936350923 |
| H  | -5.053117943 | 5.557217611  | 2.897494236 |
| H  | -4.664045453 | 3.146682290  | 2.330203482 |
| H  | -0.752607936 | 3.326448322  | 3.628655407 |
| H  | -0.982118328 | 5.704444737  | 4.321551322 |
| C  | 1.905540389  | 2.127387396  | 1.401375285 |
| O  | 0.582734241  | 2.661997729  | 1.597768502 |
| C  | 1.650855067  | 0.897380035  | 0.447263932 |
| C  | 2.455096375  | 1.710591363  | 2.771764036 |
| C  | 2.785289299  | 3.224056609  | 0.801238401 |
| B  | -0.364033204 | 1.612536854  | 1.323220373 |
| O  | 0.333122034  | 0.471778093  | 0.835351018 |

|   |              |              |              |
|---|--------------|--------------|--------------|
| C | 2.605344479  | -0.279219539 | 0.648219052  |
| C | 1.611175210  | 1.294219852  | -1.038560206 |
| H | 3.645415415  | 0.025590172  | 0.487277119  |
| H | 2.506316532  | -0.699510799 | 1.650680421  |
| H | 2.369929155  | -1.070276465 | -0.071496604 |
| H | 2.415149906  | 2.573257465  | 3.443984009  |
| H | 1.851640105  | 0.910450024  | 3.200864201  |
| H | 3.493009617  | 1.367817075  | 2.709266394  |
| H | 2.916054230  | 4.031346443  | 1.528534355  |
| H | 3.776196856  | 2.833104513  | 0.545149775  |
| H | 2.333968364  | 3.649840928  | -0.097037334 |
| H | 2.607741449  | 1.529388145  | -1.425973960 |
| H | 1.204549634  | 0.455733407  | -1.612321189 |
| H | 0.964104373  | 2.159957453  | -1.202562757 |
| C | -3.198927049 | -2.263298015 | 3.291163694  |
| C | -3.750208697 | -1.750931066 | 4.472418460  |
| C | -3.451348041 | -3.596869515 | 2.940264803  |
| C | -4.532092631 | -2.562927529 | 5.293433530  |
| C | -4.240974616 | -4.404349152 | 3.758414552  |
| C | -4.779980624 | -3.890118986 | 4.939175597  |
| H | -3.584067757 | -0.709193126 | 4.727059484  |
| H | -3.044001357 | -4.005773192 | 2.020411729  |
| H | -4.959585936 | -2.152411416 | 6.204158213  |
| H | -4.435855696 | -5.434640969 | 3.472085027  |
| H | -5.395511488 | -4.519752325 | 5.576281753  |
| C | -0.441050699 | -1.859954768 | 2.918749138  |
| C | 0.290773163  | -1.111055910 | 3.847323503  |
| C | 0.018541886  | -3.140219867 | 2.573494288  |
| C | 1.472069932  | -1.614164943 | 4.395854250  |
| C | 1.204995383  | -3.638457384 | 3.110909093  |
| C | 1.939520143  | -2.874648094 | 4.021180157  |
| H | -0.073360323 | -0.128972827 | 4.134788903  |
| H | -0.547130982 | -3.752728275 | 1.878534501  |
| H | 2.029709014  | -1.015507205 | 5.111168798  |
| H | 1.553375878  | -4.626580423 | 2.821892260  |
| H | 2.863222784  | -3.263729535 | 4.440942479  |
| C | -2.242386736 | -1.847426842 | 0.607153220  |
| C | -1.153368240 | -2.104039519 | -0.240056603 |
| C | -3.546139083 | -1.918617540 | 0.085710792  |
| C | -1.366951706 | -2.444525571 | -1.577865857 |
| C | -3.752818920 | -2.263594211 | -1.248806703 |
| C | -2.664485441 | -2.529472419 | -2.085119240 |
| H | -0.142703241 | -1.998853769 | 0.134905947  |
| H | -4.390493883 | -1.673405251 | 0.723667075  |
| H | -0.515057068 | -2.639560867 | -2.224390490 |
| H | -4.766251535 | -2.318921512 | -1.637499782 |
| H | -2.827630906 | -2.796604762 | -3.125990486 |

2-TS

|    |              |              |             |
|----|--------------|--------------|-------------|
| Rh | -2.506952941 | 1.049072279  | 2.210792438 |
| Cl | -4.947140905 | 0.605843883  | 2.166315133 |
| H  | -0.879861740 | 1.298560755  | 2.303387992 |
| P  | -2.124583226 | -1.201329570 | 2.143388893 |
| C  | -3.164645007 | 5.873097845  | 3.327961402 |
| C  | -4.235814211 | 5.088068363  | 2.907254091 |
| C  | -4.014711461 | 3.750737809  | 2.588691837 |
| N  | -2.798064630 | 3.180715705  | 2.672412714 |



|   |              |              |              |
|---|--------------|--------------|--------------|
| H | 3.712719797  | 3.776570995  | 1.388788241  |
| H | 4.512623150  | 2.259475960  | 0.940588007  |
| H | 3.616401798  | 3.192550016  | -0.277913323 |
| H | 3.676022701  | 0.875935390  | -1.207897573 |
| H | 2.177227455  | 0.065365653  | -1.707722807 |
| H | 2.232519592  | 1.832427810  | -1.607643725 |
| C | -3.232252121 | -2.297115042 | 3.191349096  |
| C | -3.941894560 | -1.755586434 | 4.269855060  |
| C | -3.283093826 | -3.680266371 | 2.962463160  |
| C | -4.683554274 | -2.586223645 | 5.110572997  |
| C | -4.033046500 | -4.506408463 | 3.797083067  |
| C | -4.732202935 | -3.960253794 | 4.876059492  |
| H | -3.942160693 | -0.682822124 | 4.428647574  |
| H | -2.745316211 | -4.113054531 | 2.124043287  |
| H | -5.236246658 | -2.153306940 | 5.939701517  |
| H | -4.071813714 | -5.575404028 | 3.605219105  |
| H | -5.316893775 | -4.604399203 | 5.527420176  |
| C | -0.500867608 | -1.777285856 | 2.766409668  |
| C | 0.116005763  | -1.069420409 | 3.808321055  |
| C | 0.093993483  | -2.967054621 | 2.320521915  |
| C | 1.297806647  | -1.535324467 | 4.387249215  |
| C | 1.284898612  | -3.423989642 | 2.887672167  |
| C | 1.890920793  | -2.712152315 | 3.925062560  |
| H | -0.333658761 | -0.144821665 | 4.157176480  |
| H | -0.366422333 | -3.539123187 | 1.521483313  |
| H | 1.758636174  | -0.971675514 | 5.194017609  |
| H | 1.737218362  | -4.341055816 | 2.519532639  |
| H | 2.816028806  | -3.070870869 | 4.367743768  |
| C | -2.329405413 | -1.873948533 | 0.474325064  |
| C | -1.252088983 | -1.875144190 | -0.426199966 |
| C | -3.610458723 | -2.214541538 | 0.009263996  |
| C | -1.447102285 | -2.249554558 | -1.757330273 |
| C | -3.797096588 | -2.588967265 | -1.320941060 |
| C | -2.716800090 | -2.614634360 | -2.207278630 |
| H | -0.269898523 | -1.554173402 | -0.095511990 |
| H | -4.459405778 | -2.160996501 | 0.683974727  |
| H | -0.604597231 | -2.246238726 | -2.444001795 |
| H | -4.792720369 | -2.852548605 | -1.667444427 |
| H | -2.867333745 | -2.903900248 | -3.243714641 |

4

|    |              |              |              |
|----|--------------|--------------|--------------|
| Rh | -3.304900817 | 0.879408319  | -0.455188194 |
| Cl | -3.768822047 | 3.309656083  | -0.410310783 |
| H  | -2.951736618 | -0.618095566 | -0.729926725 |
| P  | -1.561726214 | 0.864684683  | 0.932394926  |
| C  | -5.753584866 | -0.577425516 | -1.632807753 |
| C  | -5.532039951 | -1.904364056 | -1.150668558 |
| C  | -5.281888880 | -2.096638198 | 0.177395344  |
| N  | -5.122892496 | -1.047098105 | 1.047922624  |
| C  | -5.028887765 | 0.284874339  | 0.534253375  |
| C  | -5.616373927 | 0.499390176  | -0.785217150 |
| H  | -6.096648692 | -0.427214611 | -2.652594745 |
| H  | -5.638020006 | -2.761308605 | -1.805024675 |
| H  | -5.215124488 | -3.082106236 | 0.624566766  |
| H  | -5.225171331 | 1.028836213  | 1.300117327  |
| H  | -5.920033969 | 1.500816637  | -1.069472438 |
| C  | -5.127524894 | -2.403326064 | 4.436909353  |

|   |              |              |              |
|---|--------------|--------------|--------------|
| O | -4.953602529 | -2.554288033 | 2.994509590  |
| C | -4.676395926 | -0.908736307 | 4.684407428  |
| C | -4.265885290 | -3.452847365 | 5.130814918  |
| C | -6.613138479 | -2.646163092 | 4.724248039  |
| B | -4.989486878 | -1.291965848 | 2.470115076  |
| O | -4.939356614 | -0.283121067 | 3.386920480  |
| C | -3.178637509 | -0.772628992 | 4.954839082  |
| C | -5.480357543 | -0.157019078 | 5.739329917  |
| H | -2.920483048 | -1.168838298 | 5.941267295  |
| H | -2.595598531 | -1.302446736 | 4.202685919  |
| H | -2.899362768 | 0.282351540  | 4.916546152  |
| H | -4.645683203 | -4.451887218 | 4.898072464  |
| H | -3.228032823 | -3.395873172 | 4.798751315  |
| H | -4.298911515 | -3.319742790 | 6.217054751  |
| H | -6.890075682 | -3.636671831 | 4.353002985  |
| H | -6.825101130 | -2.605572740 | 5.796635536  |
| H | -7.239275302 | -1.906213643 | 4.217240872  |
| H | -5.376440437 | -0.640021139 | 6.716442898  |
| H | -5.101149196 | 0.865336794  | 5.822462959  |
| H | -6.539747017 | -0.106721302 | 5.482863464  |
| C | -1.611574521 | 2.106431284  | 2.289497467  |
| C | -2.814463502 | 2.281658375  | 2.988553757  |
| C | -0.486657421 | 2.852042404  | 2.667338005  |
| C | -2.883772329 | 3.171795588  | 4.058696594  |
| C | -0.561803592 | 3.747245090  | 3.736871301  |
| C | -1.757963246 | 3.907791637  | 4.437081919  |
| H | -3.692707844 | 1.714571187  | 2.707897037  |
| H | 0.446140991  | 2.744138562  | 2.122146910  |
| H | -3.824304745 | 3.299821653  | 4.588016177  |
| H | 0.316153257  | 4.322847873  | 4.017321640  |
| H | -1.815829706 | 4.608583165  | 5.265237843  |
| C | -0.030693742 | 1.279098701  | 0.001812741  |
| C | -0.045697308 | 2.473879572  | -0.742080730 |
| C | 1.099980926  | 0.452156952  | -0.042641188 |
| C | 1.066485341  | 2.835187101  | -1.500393136 |
| C | 2.206920730  | 0.819485057  | -0.811222640 |
| C | 2.194761378  | 2.010452152  | -1.537794218 |
| H | -0.931592697 | 3.106372805  | -0.726248776 |
| H | 1.121834730  | -0.475734515 | 0.519861165  |
| H | 1.048193468  | 3.760723683  | -2.068851991 |
| H | 3.078806042  | 0.171314908  | -0.839970056 |
| H | 3.057525280  | 2.292613544  | -2.134806613 |
| C | -1.155154049 | -0.690383061 | 1.835431442  |
| C | -0.217297001 | -0.680773667 | 2.882718300  |
| C | -1.783577733 | -1.896027397 | 1.500006382  |
| C | 0.088894344  | -1.854299317 | 3.568747680  |
| C | -1.487985651 | -3.068846290 | 2.198933903  |
| C | -0.550312181 | -3.051561500 | 3.231578660  |
| H | 0.264435284  | 0.248865762  | 3.169513510  |
| H | -2.504898256 | -1.905848787 | 0.690037292  |
| H | 0.817538394  | -1.833317877 | 4.374422153  |
| H | -1.997802056 | -3.991494766 | 1.937726138  |
| H | -0.318539316 | -3.964066378 | 3.774476102  |

4-TS

|    |              |             |             |
|----|--------------|-------------|-------------|
| Rh | -5.274481412 | 1.585444777 | 1.598671780 |
| Cl | -6.794531122 | 0.888632519 | 3.330326741 |





|   |              |              |              |
|---|--------------|--------------|--------------|
| H | 2.850616740  | -6.810757721 | -2.521756828 |
| C | 0.800387318  | -1.035668107 | -0.459443588 |
| C | 1.261318929  | -0.954020168 | 0.862762915  |
| C | -0.582615246 | -1.074792546 | -0.692800442 |
| C | 0.362660978  | -0.922311350 | 1.928514329  |
| C | -1.480825670 | -1.032570358 | 0.374325390  |
| C | -1.011615358 | -0.960139849 | 1.686635161  |
| H | 2.328121758  | -0.903737412 | 1.051538090  |
| H | -0.962111547 | -1.133045367 | -1.707542258 |
| H | 0.736562297  | -0.860552883 | 2.946943097  |
| H | -2.549322949 | -1.055895205 | 0.178131858  |
| H | -1.712905255 | -0.928346561 | 2.516022759  |
| C | 1.084751003  | -0.662324037 | -3.318960383 |
| C | 0.257560134  | -1.547096541 | -4.025906756 |
| C | 1.188400616  | 0.669994531  | -3.740074873 |
| C | -0.470131395 | -1.097098844 | -5.127831630 |
| C | 0.455532529  | 1.117379804  | -4.837803330 |
| C | -0.375461172 | 0.235646950  | -5.531714812 |
| H | 0.188105156  | -2.586870306 | -3.720317730 |
| H | 1.859551097  | 1.345895287  | -3.217863698 |
| H | -1.107038746 | -1.788979016 | -5.672314970 |
| H | 0.544500168  | 2.151007226  | -5.159799288 |
| H | -0.940369603 | 0.584028975  | -6.392088494 |

4'-TS

|    |              |              |              |
|----|--------------|--------------|--------------|
| Rh | -3.955235115 | 0.163744986  | 0.600554071  |
| Cl | -4.232096188 | 1.393054662  | -1.468765747 |
| H  | -3.529114616 | -0.805222194 | 1.806622359  |
| P  | -2.065825870 | 1.302570823  | 1.134113948  |
| C  | -4.980056574 | -0.881214696 | 2.270805896  |
| C  | -5.417974200 | 0.139818954  | 3.251442086  |
| C  | -6.256651617 | 1.126777178  | 2.881934794  |
| N  | -6.724254323 | 1.234213114  | 1.563944024  |
| C  | -6.475792203 | 0.189398369  | 0.683909469  |
| C  | -5.812397153 | -0.963377109 | 1.064460919  |
| H  | -4.693547398 | -1.835431764 | 2.713786009  |
| H  | -5.060339344 | 0.087965936  | 4.273697422  |
| H  | -6.593974469 | 1.909652826  | 3.549639182  |
| H  | -6.933478729 | 0.291456726  | -0.291691630 |
| H  | -5.865822982 | -1.859492062 | 0.456243425  |
| C  | -7.867852279 | 4.650927180  | 0.933055919  |
| O  | -7.143069782 | 3.666491327  | 1.745113803  |
| C  | -7.742062289 | 4.037504137  | -0.509899629 |
| C  | -7.213051055 | 6.016142143  | 1.101069587  |
| C  | -9.306969833 | 4.673944616  | 1.458857344  |
| B  | -7.201759129 | 2.496765620  | 1.034144331  |
| O  | -7.727591979 | 2.604318665  | -0.218287179 |
| C  | -6.408627722 | 4.364579250  | -1.189596248 |
| C  | -8.915600985 | 4.328883584  | -1.436316876 |
| H  | -6.383724650 | 5.405034895  | -1.528898486 |
| H  | -5.561653619 | 4.185752786  | -0.522155254 |
| H  | -6.276791506 | 3.703734178  | -2.048964440 |
| H  | -7.303658711 | 6.346880934  | 2.140412973  |
| H  | -6.156237724 | 5.991935277  | 0.836589812  |
| H  | -7.715298678 | 6.752670195  | 0.465018415  |
| H  | -9.292325960 | 4.901769973  | 2.528386125  |
| H  | -9.905489071 | 5.435200826  | 0.950030012  |

|   |              |              |              |
|---|--------------|--------------|--------------|
| H | -9.790187346 | 3.702286796  | 1.321275354  |
| H | -9.017389660 | 5.407557174  | -1.595245785 |
| H | -8.739788187 | 3.856212284  | -2.406266459 |
| H | -9.853672326 | 3.942414773  | -1.033562788 |
| C | -2.406728729 | 3.108293863  | 1.211817794  |
| C | -3.589557358 | 3.513759752  | 1.848761756  |
| C | -1.532955670 | 4.079395386  | 0.709520067  |
| C | -3.878296516 | 4.866035521  | 2.010536957  |
| C | -1.838345027 | 5.435845888  | 0.847807007  |
| C | -3.004147837 | 5.832390162  | 1.504479492  |
| H | -4.281377492 | 2.765032121  | 2.220218022  |
| H | -0.618439842 | 3.780361255  | 0.207207280  |
| H | -4.792121306 | 5.154403081  | 2.519453630  |
| H | -1.159204777 | 6.182618909  | 0.445093085  |
| H | -3.232965316 | 6.888878182  | 1.618795388  |
| C | -0.552876653 | 1.150937756  | 0.101831013  |
| C | -0.700938466 | 0.906242284  | -1.271847360 |
| C | 0.734346637  | 1.292780652  | 0.644013141  |
| C | 0.426872523  | 0.812488753  | -2.087933506 |
| C | 1.857277387  | 1.192857750  | -0.177209932 |
| C | 1.705177596  | 0.953663165  | -1.544516249 |
| H | -1.697338315 | 0.802356288  | -1.691381556 |
| H | 0.860493096  | 1.476887614  | 1.706686580  |
| H | 0.303713853  | 0.624753245  | -3.151056774 |
| H | 2.850086700  | 1.300670485  | 0.251567679  |
| H | 2.581054601  | 0.874171538  | -2.183086028 |
| C | -1.429177697 | 0.939982515  | 2.829983382  |
| C | -1.250124478 | 1.926576614  | 3.808022083  |
| C | -1.115073579 | -0.391797033 | 3.146253757  |
| C | -0.780785696 | 1.585539928  | 5.079544404  |
| C | -0.637119221 | -0.728860587 | 4.410126474  |
| C | -0.473906266 | 0.260503197  | 5.384577189  |
| H | -1.478400565 | 2.962830845  | 3.582976019  |
| H | -1.246232395 | -1.166603402 | 2.394662773  |
| H | -0.653797748 | 2.361374356  | 5.829970197  |
| H | -0.394336485 | -1.763480809 | 4.637417741  |
| H | -0.108458722 | -0.002360715 | 6.373582559  |

5

|    |              |              |             |
|----|--------------|--------------|-------------|
| Rh | -3.167833893 | 3.615165851  | 2.157586897 |
| Cl | -3.013800990 | 3.432349918  | 4.542607366 |
| P  | -1.554437959 | 2.001525564  | 1.738522465 |
| C  | -1.918481631 | 0.272561986  | 2.282508855 |
| C  | -1.446526586 | -0.854551192 | 1.590374885 |
| C  | -2.626296036 | 0.090264140  | 3.480375234 |
| C  | -1.676055536 | -2.137402331 | 2.088268195 |
| C  | -2.849844008 | -1.195749453 | 3.975401941 |
| C  | -2.377555018 | -2.311739700 | 3.282714926 |
| H  | -0.905013812 | -0.736635660 | 0.657408028 |
| H  | -2.984327792 | 0.956475875  | 4.029123661 |
| H  | -1.307205200 | -3.000458831 | 1.540318138 |
| H  | -3.398486988 | -1.321061030 | 4.904829825 |
| H  | -2.556617545 | -3.311640144 | 3.668836186 |
| C  | 0.090653364  | 2.319371472  | 2.497601890 |
| C  | 1.129983791  | 1.379727138  | 2.404604261 |
| C  | 0.311107044  | 3.522963044  | 3.179033115 |
| C  | 2.372566733  | 1.646742118  | 2.974140035 |

|   |              |              |              |
|---|--------------|--------------|--------------|
| C | 1.558615347  | 3.786975022  | 3.748938811  |
| C | 2.589024655  | 2.853168573  | 3.646314754  |
| H | 0.966246345  | 0.435799341  | 1.893463352  |
| H | -0.502868936 | 4.232647321  | 3.282591212  |
| H | 3.170435170  | 0.912788925  | 2.899011613  |
| H | 1.718170650  | 4.719840936  | 4.282397842  |
| H | 3.557540185  | 3.058459224  | 4.094584932  |
| C | -1.173350472 | 1.806067408  | -0.053569886 |
| C | -2.077860941 | 1.120326390  | -0.884576964 |
| C | -0.047614672 | 2.409105643  | -0.632463681 |
| C | -1.851073414 | 1.035493978  | -2.258295935 |
| C | 0.172181138  | 2.325072875  | -2.009161560 |
| C | -0.725539715 | 1.637272620  | -2.826936133 |
| H | -2.962038815 | 0.655751821  | -0.457097002 |
| H | 0.664782741  | 2.938666328  | -0.007393084 |
| H | -2.557406166 | 0.497340249  | -2.884909301 |
| H | 1.052359266  | 2.794586121  | -2.440353157 |
| H | -0.549864959 | 1.569670215  | -3.896877785 |
| C | -7.026631765 | 0.089663437  | 1.654963030  |
| O | -7.144823132 | 1.530400332  | 1.455277652  |
| C | -6.086845636 | -0.337362380 | 0.464344281  |
| C | -8.422291811 | -0.521158391 | 1.622326225  |
| C | -6.376400733 | -0.109725876 | 3.028248131  |
| B | -6.005347118 | 1.910450908  | 0.792652360  |
| O | -5.282713377 | 0.859966114  | 0.267559591  |
| N | -5.560289472 | 3.265999803  | 0.690805405  |
| C | -6.845865989 | -0.581642229 | -0.844028774 |
| C | -5.146817832 | -1.497435824 | 0.773271478  |
| H | -7.430617640 | -1.505359088 | -0.803856851 |
| H | -7.520450197 | 0.250259526  | -1.066908603 |
| H | -6.124150007 | -0.663348704 | -1.661672650 |
| H | -8.999514338 | -0.164871375 | 2.480062226  |
| H | -8.959949321 | -0.245105742 | 0.713552451  |
| H | -8.363671938 | -1.613194242 | 1.679323979  |
| H | -6.987447958 | 0.389677914  | 3.784952829  |
| H | -6.298539221 | -1.170134454 | 3.285420739  |
| H | -5.375005479 | 0.326522883  | 3.057288285  |
| H | -5.716426834 | -2.396905491 | 1.030382157  |
| H | -4.537153462 | -1.723315556 | -0.106936497 |
| H | -4.472241783 | -1.260079992 | 1.595770842  |
| C | -3.894041358 | 5.544432339  | 1.417483064  |
| C | -4.948907532 | 5.102960957  | 2.216680149  |
| C | -3.530906673 | 4.679512116  | 0.322872564  |
| H | -3.276165770 | 6.397263369  | 1.680567200  |
| C | -6.082845074 | 4.288836422  | 1.618373300  |
| H | -5.145456571 | 5.593214117  | 3.164610037  |
| H | -6.775213772 | 4.955816768  | 1.082307021  |
| H | -6.652292395 | 3.790871535  | 2.405770224  |
| C | -4.246666316 | 3.458810845  | 0.239086269  |
| H | -3.911834351 | 2.711497632  | -0.467784618 |
| H | -2.700537991 | 4.886733669  | -0.341695233 |

5'

|    |              |              |             |
|----|--------------|--------------|-------------|
| Rh | -3.685394291 | 0.440466998  | 2.298328065 |
| Cl | -3.358373948 | -1.274523478 | 0.692653153 |
| H  | -4.848739355 | -0.772774313 | 4.948836179 |
| P  | -1.753577857 | 1.474817577  | 2.068641000 |

|   |              |              |              |
|---|--------------|--------------|--------------|
| C | -5.310637079 | 0.215014513  | 4.810766279  |
| C | -4.311229939 | 1.195215421  | 4.217084587  |
| C | -4.714948504 | 2.100950930  | 3.220306097  |
| N | -5.992715182 | 2.045576587  | 2.607080697  |
| C | -6.828094068 | 0.963895343  | 2.954817078  |
| C | -6.549960394 | 0.107989640  | 3.949128291  |
| H | -5.581856351 | 0.552475424  | 5.826397687  |
| H | -3.477247058 | 1.491217028  | 4.847737688  |
| H | -4.217219473 | 3.049615198  | 3.093797425  |
| H | -7.717087714 | 0.875123014  | 2.340772840  |
| H | -7.252847504 | -0.693256260 | 4.152845209  |
| C | -6.531626965 | 3.098154117  | -0.823410361 |
| O | -7.060507307 | 2.512680837  | 0.409194017  |
| C | -5.613352994 | 4.248353548  | -0.269722902 |
| C | -7.699367195 | 3.561194685  | -1.684391380 |
| C | -5.732653891 | 1.995924431  | -1.529763813 |
| B | -6.096063546 | 2.743037967  | 1.356264833  |
| O | -5.157397346 | 3.683697910  | 0.991785158  |
| C | -6.391497001 | 5.525065747  | 0.065877818  |
| C | -4.388816103 | 4.565769332  | -1.119890778 |
| H | -6.705169364 | 6.053446266  | -0.839315231 |
| H | -7.279012812 | 5.296923936  | 0.663257521  |
| H | -5.747785568 | 6.188840676  | 0.649780470  |
| H | -8.277003734 | 2.694593684  | -2.017706958 |
| H | -8.367870482 | 4.223222248  | -1.131360983 |
| H | -7.333667490 | 4.089650310  | -2.571295290 |
| H | -6.386120990 | 1.136375906  | -1.701211740 |
| H | -5.346862476 | 2.339856271  | -2.494435719 |
| H | -4.890834950 | 1.661552931  | -0.916891912 |
| H | -4.688291566 | 4.887650226  | -2.123053736 |
| H | -3.819658356 | 5.378934150  | -0.658970518 |
| H | -3.728659730 | 3.703187312  | -1.207186302 |
| C | -1.436493400 | 2.200983945  | 0.394665938  |
| C | -0.645311976 | 3.349939535  | 0.224570027  |
| C | -1.933492929 | 1.547645374  | -0.743608404 |
| C | -0.368870988 | 3.838831398  | -1.052756063 |
| C | -1.645669104 | 2.036267871  | -2.019245189 |
| C | -0.869518921 | 3.185388052  | -2.180196644 |
| H | -0.245339479 | 3.874073650  | 1.085956358  |
| H | -2.534894794 | 0.651956058  | -0.628843340 |
| H | 0.240250655  | 4.732015669  | -1.163582044 |
| H | -2.038046231 | 1.515430951  | -2.888281452 |
| H | -0.653401907 | 3.567464885  | -3.174044875 |
| C | -0.270618528 | 0.430014050  | 2.366140265  |
| C | 1.018321134  | 0.973959039  | 2.239509479  |
| C | -0.420093695 | -0.913965325 | 2.728827279  |
| C | 2.139618414  | 0.184997192  | 2.483387076  |
| C | 0.707898801  | -1.701679272 | 2.969046328  |
| C | 1.985121611  | -1.154993533 | 2.850492495  |
| H | 1.146052310  | 2.012339049  | 1.948435698  |
| H | -1.415527794 | -1.339769111 | 2.798321080  |
| H | 3.133336708  | 0.613160544  | 2.384235448  |
| H | 0.583705897  | -2.745488252 | 3.242916202  |
| H | 2.860847641  | -1.770335898 | 3.038597806  |
| C | -1.515088899 | 2.895332366  | 3.210501335  |
| C | -2.123352707 | 4.131653478  | 2.929396035  |
| C | -0.841467383 | 2.730670447  | 4.429729325  |
| C | -2.042284330 | 5.181496895  | 3.842963438  |

|   |              |             |             |
|---|--------------|-------------|-------------|
| C | -0.766742580 | 3.783313071 | 5.343065540 |
| C | -1.364137849 | 5.010514469 | 5.051842025 |
| H | -2.669339503 | 4.268939731 | 1.999961205 |
| H | -0.369552776 | 1.781367902 | 4.664467442 |
| H | -2.514742979 | 6.131895911 | 3.610783377 |
| H | -0.238653886 | 3.642648933 | 6.282220532 |
| H | -1.304952546 | 5.828249695 | 5.764672681 |

5-TS

|    |              |              |              |
|----|--------------|--------------|--------------|
| Rh | -2.122864252 | 2.813662435  | 2.106499278  |
| Cl | -4.239554138 | 3.536025894  | 1.111009795  |
| H  | -0.711236807 | 2.372957088  | 2.757551256  |
| P  | -1.118159945 | 3.106168243  | 0.069114033  |
| C  | 0.708062853  | 5.726440766  | 3.197236296  |
| O  | 0.210367779  | 4.688524930  | 2.312923931  |
| C  | -0.469674312 | 5.850646258  | 4.228391249  |
| C  | 0.979051557  | 6.973524578  | 2.361813745  |
| C  | 2.000885856  | 5.194280343  | 3.824226182  |
| B  | -0.781472814 | 3.990498022  | 2.980075925  |
| O  | -0.966239191 | 4.480613256  | 4.268211636  |
| C  | -1.612527749 | 6.737078098  | 3.717353260  |
| C  | -0.057624331 | 6.258105191  | 5.637839328  |
| H  | -1.331029015 | 7.794702529  | 3.728709255  |
| H  | -1.901407920 | 6.461567196  | 2.699042442  |
| H  | -2.482958535 | 6.600298426  | 4.364782547  |
| H  | 1.805179605  | 6.780373259  | 1.671511526  |
| H  | 0.109210916  | 7.248452539  | 1.763494244  |
| H  | 1.255600177  | 7.816492238  | 3.004482669  |
| H  | 2.692670852  | 4.916745541  | 3.023643298  |
| H  | 2.484078817  | 5.945648791  | 4.456181198  |
| H  | 1.798876420  | 4.304552619  | 4.427694588  |
| H  | 0.419163266  | 7.244198106  | 5.629733272  |
| H  | -0.942125601 | 6.311407165  | 6.279090880  |
| H  | 0.635116195  | 5.536630303  | 6.074842145  |
| C  | -2.136436055 | 2.359791086  | -1.264675403 |
| C  | -2.226329920 | 2.933489980  | -2.539018491 |
| C  | -2.811667881 | 1.159659001  | -1.000120875 |
| C  | -2.973458402 | 2.306462871  | -3.538132920 |
| C  | -3.555377045 | 0.536836510  | -1.999320237 |
| C  | -3.635876578 | 1.108053888  | -3.271536746 |
| H  | -1.720183997 | 3.870545327  | -2.750373580 |
| H  | -2.779618481 | 0.715238124  | -0.011763981 |
| H  | -3.040914309 | 2.760547669  | -4.523029501 |
| H  | -4.077845863 | -0.387415456 | -1.772074989 |
| H  | -4.220784470 | 0.625623723  | -4.049999857 |
| C  | 0.527398491  | 2.297923440  | -0.184323071 |
| C  | 0.871897427  | 1.765708179  | -1.437851016 |
| C  | 1.468494077  | 2.232788542  | 0.853672259  |
| C  | 2.122466674  | 1.182268493  | -1.644520336 |
| C  | 2.718654459  | 1.652586268  | 0.643439730  |
| C  | 3.049963041  | 1.122518434  | -0.604665373 |
| H  | 0.160890325  | 1.796027896  | -2.256456236 |
| H  | 1.233457896  | 2.650935535  | 1.821847686  |
| H  | 2.367234798  | 0.770843281  | -2.620085752 |
| H  | 3.433250209  | 1.612021564  | 1.461230535  |
| H  | 4.022388163  | 0.664549793  | -0.764496809 |
| C  | -0.834027173 | 4.835866008  | -0.484815943 |

|   |              |              |              |
|---|--------------|--------------|--------------|
| C | 0.365279814  | 5.239153324  | -1.085945687 |
| C | -1.855855266 | 5.775934706  | -0.280459455 |
| C | 0.542051321  | 6.566780643  | -1.479039925 |
| C | -1.672857836 | 7.099931064  | -0.677640367 |
| C | -0.474706523 | 7.499993794  | -1.275429848 |
| H | 1.168136836  | 4.525487790  | -1.237499253 |
| H | -2.784753921 | 5.463032205  | 0.188107154  |
| H | 1.478480866  | 6.870486716  | -1.939793463 |
| H | -2.469012265 | 7.821521452  | -0.515585272 |
| H | -0.333789568 | 8.534130107  | -1.578537133 |
| C | -2.012217874 | -2.683804610 | 0.441798762  |
| O | -2.907676608 | -1.646274190 | 0.936553815  |
| C | -0.623469812 | -2.233690623 | 1.034316250  |
| C | -2.081829555 | -2.707140574 | -1.081512933 |
| C | -2.512422748 | -4.012403360 | 1.021143263  |
| B | -2.315161523 | -1.144435369 | 2.078423480  |
| O | -1.017902637 | -1.556585689 | 2.263263414  |
| N | -2.998055576 | -0.276012667 | 2.977826617  |
| C | 0.089893496  | -1.202770391 | 0.156568792  |
| C | 0.320170530  | -3.375325254 | 1.395391476  |
| H | 0.489823984  | -1.659195631 | -0.753733272 |
| H | -0.584635171 | -0.395736242 | -0.134011352 |
| H | 0.918514018  | -0.757591370 | 0.712365819  |
| H | -3.080666765 | -3.021192538 | -1.399721209 |
| H | -1.886438681 | -1.722856236 | -1.508107998 |
| H | -1.355734364 | -3.419705559 | -1.487071593 |
| H | -3.558193209 | -4.152289672 | 0.733564295  |
| H | -1.931981148 | -4.859758238 | 0.644055312  |
| H | -2.456725428 | -4.010142277 | 2.113726545  |
| H | 0.561185457  | -3.968954305 | 0.507178093  |
| H | 1.252191775  | -2.966921193 | 1.796150424  |
| H | -0.114520900 | -4.033236888 | 2.149920210  |
| C | -3.948856478 | 2.158569712  | 3.938660767  |
| C | -2.674454209 | 1.779775582  | 4.268359714  |
| C | -4.848469687 | 1.209290108  | 3.310908384  |
| H | -4.299303658 | 3.164501447  | 4.143605014  |
| C | -2.324725914 | 0.312909368  | 4.147696372  |
| H | -2.040589795 | 2.413055531  | 4.874154474  |
| H | -1.250790979 | 0.159465112  | 4.039691976  |
| H | -2.657102020 | -0.219936175 | 5.057055234  |
| C | -4.330511000 | 0.072688086  | 2.789423143  |
| H | -4.892313181 | -0.577512162 | 2.126725038  |
| H | -5.870628599 | 1.488650068  | 3.094196265  |

6

|    |              |             |             |
|----|--------------|-------------|-------------|
| Rh | -2.131435963 | 2.693928553 | 2.104921684 |
| Cl | -4.143367946 | 4.052480134 | 1.414400939 |
| H  | -0.871952217 | 1.812973368 | 2.365436015 |
| P  | -1.164578076 | 3.089242798 | 0.033548868 |
| C  | 0.638467015  | 5.635778675 | 3.307553589 |
| O  | 0.145536953  | 4.623231556 | 2.387313130 |
| C  | -0.657031504 | 5.986214845 | 4.126847452 |
| C  | 1.218786430  | 6.782870714 | 2.485825970 |
| C  | 1.725764834  | 4.967185968 | 4.155338061 |
| B  | -1.014432455 | 4.095064967 | 2.917229124 |
| O  | -1.393637269 | 4.727308973 | 4.082893321 |
| C  | -1.534385857 | 7.035646417 | 3.433703599 |

|             |              |              |              |   |              |              |              |
|-------------|--------------|--------------|--------------|---|--------------|--------------|--------------|
| C           | -0.419382135 | 6.358243434  | 5.585600627  | H | 1.140416294  | -0.973851788 | 0.980592760  |
| H           | -1.078290890 | 8.029844025  | 3.478396644  | H | -2.825080137 | -2.923155338 | -1.483411060 |
| H           | -1.707873603 | 6.773201297  | 2.386729642  | H | -1.605824285 | -1.644271533 | -1.434152738 |
| H           | -2.505172695 | 7.070672577  | 3.934836192  | H | -1.105283482 | -3.349098556 | -1.508322094 |
| H           | 2.107638710  | 6.437187556  | 1.949606274  | H | -3.465293432 | -4.156456796 | 0.547398240  |
| H           | 0.504092753  | 7.142502736  | 1.744051149  | H | -1.864724512 | -4.923667527 | 0.488835546  |
| H           | 1.511332195  | 7.614643563  | 3.135998005  | H | -2.430997587 | -4.151141927 | 1.985653274  |
| H           | 2.495777452  | 4.564671465  | 3.490761107  | H | 0.665094824  | -4.134289853 | 0.538942293  |
| H           | 2.197085952  | 5.676992101  | 4.841865976  | H | 1.323409820  | -3.250312092 | 1.927424010  |
| H           | 1.309621053  | 4.139609881  | 4.737209373  | H | -0.101238130 | -4.277629093 | 2.136462432  |
| H           | 0.210194728  | 7.251798725  | 5.657553736  | C | -3.640954806 | 2.170335530  | 3.851398488  |
| H           | -1.376143766 | 6.574762236  | 6.069011605  | C | -2.390240168 | 1.709883530  | 4.218124152  |
| H           | 0.061262047  | 5.545777359  | 6.133769566  | C | -4.576217825 | 1.255996670  | 3.201919114  |
| C           | -2.270633476 | 2.381480469  | -1.244541510 | H | -3.966525422 | 3.170123219  | 4.111968998  |
| C           | -2.579600919 | 3.044509414  | -2.437278480 | C | -2.141903704 | 0.214774286  | 4.172521898  |
| C           | -2.809323359 | 1.108070917  | -1.000848687 | H | -1.754885732 | 2.304263885  | 4.865739307  |
| C           | -3.415336712 | 2.437064200  | -3.376823381 | H | -1.079982801 | -0.019016655 | 4.091409497  |
| C           | -3.640612170 | 0.505590500  | -1.941142230 | H | -2.514631425 | -0.228868652 | 5.112299460  |
| C           | -3.945276767 | 1.169967022  | -3.132148450 | C | -4.133532416 | 0.055681893  | 2.765817444  |
| H           | -2.174662651 | 4.032884551  | -2.630438828 | H | -4.727873250 | -0.589558051 | 2.127476078  |
| H           | -2.591694902 | 0.578879399  | -0.078014893 | H | -5.564579594 | 1.604781596  | 2.934835056  |
| H           | -3.653939581 | 2.959085367  | -4.299504379 |   |              |              |              |
| H           | -4.051356809 | -0.477694317 | -1.732407956 |   |              |              |              |
| H           | -4.598267033 | 0.703562083  | -3.864839972 |   |              |              |              |
| C           | 0.437542802  | 2.236040166  | -0.280295521 |   |              |              |              |
| C           | 0.725750374  | 1.674681688  | -1.532787473 |   |              |              |              |
| C           | 1.416411461  | 2.205930432  | 0.723761622  |   |              |              |              |
| C           | 1.967132407  | 1.083040755  | -1.772737848 |   |              |              |              |
| C           | 2.657812391  | 1.621674842  | 0.477131374  |   |              |              |              |
| C           | 2.935751524  | 1.055131640  | -0.769045739 |   |              |              |              |
| H           | -0.020547792 | 1.693751923  | -2.320827256 |   |              |              |              |
| H           | 1.207350347  | 2.657630410  | 1.685878330  |   |              |              |              |
| H           | 2.175190080  | 0.644482014  | -2.745028129 |   |              |              |              |
| H           | 3.408990485  | 1.605932161  | 1.262439789  |   |              |              |              |
| H           | 3.901771090  | 0.593660933  | -0.955897064 |   |              |              |              |
| C           | -0.808266451 | 4.813558443  | -0.501245476 |   |              |              |              |
| C           | 0.439922666  | 5.172997951  | -1.030896189 |   |              |              |              |
| C           | -1.797746017 | 5.797409149  | -0.345711701 |   |              |              |              |
| C           | 0.695423982  | 6.494850306  | -1.397350915 |   |              |              |              |
| C           | -1.535136264 | 7.115942206  | -0.717283670 |   |              |              |              |
| C           | -0.289588395 | 7.470305777  | -1.240935171 |   |              |              |              |
| H           | 1.220733026  | 4.430227570  | -1.147981776 |   |              |              |              |
| H           | -2.759732840 | 5.527234510  | 0.080470474  |   |              |              |              |
| H           | 1.668953074  | 6.760437136  | -1.801028762 |   |              |              |              |
| H           | -2.308429750 | 7.868817703  | -0.590414920 |   |              |              |              |
| H           | -0.087626967 | 8.499976552  | -1.524415598 |   |              |              |              |
| C           | -1.850826232 | -2.737986411 | 0.432385565  |   |              |              |              |
| O           | -2.729083939 | -1.697992478 | 0.949899675  |   |              |              |              |
| C           | -0.477963049 | -2.388089610 | 1.121542869  |   |              |              |              |
| C           | -1.840205174 | -2.652827887 | -1.090610323 |   |              |              |              |
| C           | -2.430981810 | -4.079609582 | 0.894002053  |   |              |              |              |
| B           | -2.169618417 | -1.279692281 | 2.142125188  |   |              |              |              |
| O           | -0.907148035 | -1.773549292 | 2.369897315  |   |              |              |              |
| N           | -2.840416215 | -0.401207215 | 3.035174222  |   |              |              |              |
| C           | 0.321428818  | -1.333361129 | 0.353883027  |   |              |              |              |
| C           | 0.399235549  | -3.590743606 | 1.451804664  |   |              |              |              |
| H           | 0.745310311  | -1.738450015 | -0.569319876 |   |              |              |              |
| H           | -0.297820310 | -0.471638565 | 0.098252721  |   |              |              |              |
| H           | 1.140416294  | -0.973851788 | 0.980592760  |   |              |              |              |
| H           | -2.825080137 | -2.923155338 | -1.483411060 |   |              |              |              |
| H           | -1.605824285 | -1.644271533 | -1.434152738 |   |              |              |              |
| H           | -1.105283482 | -3.349098556 | -1.508322094 |   |              |              |              |
| H           | -3.465293432 | -4.156456796 | 0.547398240  |   |              |              |              |
| H           | -1.864724512 | -4.923667527 | 0.488835546  |   |              |              |              |
| H           | -2.430997587 | -4.151141927 | 1.985653274  |   |              |              |              |
| H           | 0.665094824  | -4.134289853 | 0.538942293  |   |              |              |              |
| H           | 1.323409820  | -3.250312092 | 1.927424010  |   |              |              |              |
| H           | -0.101238130 | -4.277629093 | 2.136462432  |   |              |              |              |
| C           | -3.640954806 | 2.170335530  | 3.851398488  |   |              |              |              |
| C           | -2.390240168 | 1.709883530  | 4.218124152  |   |              |              |              |
| C           | -4.576217825 | 1.255996670  | 3.201919114  |   |              |              |              |
| H           | -3.966525422 | 3.170123219  | 4.111968998  |   |              |              |              |
| C           | -2.141903704 | 0.214774286  | 4.172521898  |   |              |              |              |
| H           | -1.754885732 | 2.304263885  | 4.865739307  |   |              |              |              |
| H           | -1.079982801 | -0.019016655 | 4.091409497  |   |              |              |              |
| H           | -2.514631425 | -0.228868652 | 5.112299460  |   |              |              |              |
| C           | -4.133532416 | 0.055681893  | 2.765817444  |   |              |              |              |
| H           | -4.727873250 | -0.589558051 | 2.127476078  |   |              |              |              |
| H           | -5.564579594 | 1.604781596  | 2.934835056  |   |              |              |              |
| =====       |              |              |              |   |              |              |              |
| <b>6-TS</b> |              |              |              |   |              |              |              |
| =====       |              |              |              |   |              |              |              |
| Rh          | -2.235870380 | 2.839885379  | 2.268375389  |   |              |              |              |
| Cl          | -4.167484345 | 4.211142606  | 1.681990010  |   |              |              |              |
| H           | -1.082377459 | 1.878671831  | 2.898980566  |   |              |              |              |
| P           | -1.172835093 | 3.100882089  | 0.179595879  |   |              |              |              |
| C           | 0.579510627  | 5.782281130  | 3.352175795  |   |              |              |              |
| O           | 0.068899243  | 4.735920555  | 2.478631090  |   |              |              |              |
| C           | -0.736211712 | 6.293009438  | 4.042925685  |   |              |              |              |
| C           | 1.305804858  | 6.812158938  | 2.493100609  |   |              |              |              |
| C           | 1.549144900  | 5.104538885  | 4.327207499  |   |              |              |              |
| B           | -1.152967766 | 4.332868174  | 2.979885988  |   |              |              |              |
| O           | -1.558697428 | 5.086520989  | 4.054494430  |   |              |              |              |
| C           | -1.487322029 | 7.329975163  | 3.198953179  |   |              |              |              |
| C           | -0.568377003 | 6.779679603  | 5.476960065  |   |              |              |              |
| H           | -0.968410621 | 8.293995157  | 3.196649591  |   |              |              |              |
| H           | -1.602627674 | 6.988463585  | 2.166631773  |   |              |              |              |
| H           | -2.486977636 | 7.467936190  | 3.618733857  |   |              |              |              |
| H           | 2.199608399  | 6.359253097  | 2.053247822  |   |              |              |              |
| H           | 0.675542278  | 7.163875062  | 1.675123470  |   |              |              |              |
| H           | 1.618151024  | 7.669128837  | 3.099952988  |   |              |              |              |
| H           | 2.322861068  | 4.585575125  | 3.753778203  |   |              |              |              |
| H           | 2.034073420  | 5.830732239  | 4.986863264  |   |              |              |              |
| H           | 1.026978246  | 4.367156363  | 4.944424617  |   |              |              |              |
| H           | 0.118023745  | 7.632517462  | 5.516091409  |   |              |              |              |
| H           | -1.536811833 | 7.101848297  | 5.869580515  |   |              |              |              |
| H           | -0.184781727 | 5.990541014  | 6.126471210  |   |              |              |              |
| C           | -2.205978987 | 2.311537172  | -1.119769021 |   |              |              |              |
| C           | -2.318728746 | 2.823232273  | -2.419690241 |   |              |              |              |
| C           | -2.900299718 | 1.140079135  | -0.782358280 |   |              |              |              |
| C           | -3.107553528 | 2.167211961  | -3.366320872 |   |              |              |              |
| C           | -3.688287686 | 0.487979082  | -1.728409835 |   |              |              |              |
| C           | -3.792790554 | 1.000615435  | -3.023499607 |   |              |              |              |
| H           | -1.797876969 | 3.736821554  | -2.689848809 |   |              |              |              |
| H           | -2.835244951 | 0.729806046  | 0.220133542  |   |              |              |              |
| H           | -3.190137607 | 2.572970543  | -4.371131727 |   |              |              |              |

|   |              |              |              |
|---|--------------|--------------|--------------|
| H | -4.217669979 | -0.415733943 | -1.442998406 |
| H | -4.410907218 | 0.496420238  | -3.761467690 |
| C | 0.458192757  | 2.262877906  | -0.017169214 |
| C | 0.902915026  | 1.813999794  | -1.270336894 |
| C | 1.297820436  | 2.114668749  | 1.094577294  |
| C | 2.160798341  | 1.227034272  | -1.406298775 |
| C | 2.556305270  | 1.527968826  | 0.956775212  |
| C | 2.991071977  | 1.082735996  | -0.292843231 |
| H | 0.262927277  | 1.917026774  | -2.141390322 |
| H | 0.971819699  | 2.485570729  | 2.059138180  |
| H | 2.490825272  | 0.879149989  | -2.381541269 |
| H | 3.198347261  | 1.420780523  | 1.827140507  |
| H | 3.970282008  | 0.623320974  | -0.398699173 |
| C | -0.845576627 | 4.789929421  | -0.468194530 |
| C | 0.427207242  | 5.205448780  | -0.881656733 |
| C | -1.912131132 | 5.703593409  | -0.500912744 |
| C | 0.630959797  | 6.512384795  | -1.326923556 |
| C | -1.701266189 | 7.007661416  | -0.948059557 |
| C | -0.430903450 | 7.416813077  | -1.361464565 |
| H | 1.265025364  | 4.517828795  | -0.847595256 |
| H | -2.893919110 | 5.398081328  | -0.151562063 |
| H | 1.623935937  | 6.823292275  | -1.641256810 |
| H | -2.533086551 | 7.706566991  | -0.966411348 |
| H | -0.269357766 | 8.434662546  | -1.706769074 |
| C | -2.030366956 | -2.851165664 | 0.263292417  |
| O | -2.820325074 | -1.801061015 | 0.894666086  |
| C | -0.569368251 | -2.475750552 | 0.709366502  |
| C | -2.266298144 | -2.811923505 | -1.242526073 |
| C | -2.512132395 | -4.184305581 | 0.847577419  |
| B | -2.083239297 | -1.373705435 | 1.982124592  |
| O | -0.797072550 | -1.865093550 | 2.012245891  |
| N | -2.595287354 | -0.485448083 | 2.964404708  |
| C | 0.067784465  | -1.406849071 | -0.183141983 |
| C | 0.374243143  | -3.659690959 | 0.887803903  |
| H | 0.358472976  | -1.816090700 | -1.155350800 |
| H | -0.615206542 | -0.571420878 | -0.352973909 |
| H | 0.960245630  | -1.012224126 | 0.307264790  |
| H | -3.302581526 | -3.086166437 | -1.462271361 |
| H | -2.085631233 | -1.817766604 | -1.651958893 |
| H | -1.610808012 | -3.528386258 | -1.749219563 |
| H | -3.589608696 | -4.273902696 | 0.683886556  |
| H | -2.015973974 | -5.034802280 | 0.370159911  |
| H | -2.325141599 | -4.230994980 | 1.924445314  |
| H | 0.490719682  | -4.203424195 | -0.055727678 |
| H | 1.359501255  | -3.299550980 | 1.197586616  |
| H | 0.010677451  | -4.351812666 | 1.649392146  |
| C | -3.216524641 | 2.087141308  | 4.056371823  |
| C | -1.884202631 | 1.566749620  | 4.138076040  |
| C | -4.236397971 | 1.215406814  | 3.466016536  |
| H | -3.509543844 | 2.950473524  | 4.642819420  |
| C | -1.744105042 | 0.047025484  | 4.025446785  |
| H | -1.209918370 | 2.032596917  | 4.854841259  |
| H | -0.714056636 | -0.257304846 | 3.832611284  |
| H | -2.050513572 | -0.373860581 | 4.996896711  |
| C | -3.897130618 | 0.039569278  | 2.889887778  |
| H | -4.597013054 | -0.549513818 | 2.307410445  |
| H | -5.246863676 | 1.590680917  | 3.364746424  |

### 6'-TS

|    |              |             |              |
|----|--------------|-------------|--------------|
| Rh | -2.937572142 | 3.302528744 | 1.628470113  |
| Cl | -5.001619769 | 4.513373076 | 1.420319403  |
| H  | -1.702994120 | 2.232012556 | 1.964305337  |
| P  | -1.942991676 | 4.137411712 | -0.353954262 |
| C  | -1.010661579 | 5.424800371 | 4.646969588  |
| O  | -1.304502584 | 4.199917178 | 3.912216096  |
| C  | -0.931443456 | 6.490329401 | 3.493464117  |
| C  | 0.281328371  | 5.223872950 | 5.430080647  |
| C  | -2.190700909 | 5.656196351 | 5.597999921  |
| B  | -1.943555477 | 4.580252800 | 2.746558387  |
| O  | -1.843958705 | 5.931268175 | 2.503933884  |
| C  | 0.450111443  | 6.569399204 | 2.837123133  |
| C  | -1.427137202 | 7.883273515 | 3.867485779  |
| H  | 1.178042394  | 7.052091310 | 3.496838952  |
| H  | 0.819039962  | 5.577247445 | 2.568855267  |
| H  | 0.373538458  | 7.151021839 | 1.915294204  |
| H  | 0.132717950  | 4.455671136 | 6.194607551  |
| H  | 1.096476760  | 4.903185432 | 4.779178317  |
| H  | 0.576430373  | 6.152060956 | 5.931263996  |
| H  | -2.304980910 | 4.777484225 | 6.239077499  |
| H  | -2.031003646 | 6.531615565 | 6.234569535  |
| H  | -3.120496948 | 5.792198947 | 5.038353017  |
| H  | -0.827255124 | 8.300388696 | 4.683771561  |
| H  | -1.336630802 | 8.548025447 | 3.003484662  |
| H  | -2.474605082 | 7.865992190 | 4.172463776  |
| C  | -0.169927220 | 4.617311396 | -0.257877090 |
| C  | 0.335734040  | 5.791472044 | -0.828934158 |
| C  | 0.709434389  | 3.748341777 | 0.407144656  |
| C  | 1.697058922  | 6.091173514 | -0.733723946 |
| C  | 2.068602692  | 4.042055538 | 0.489105154  |
| C  | 2.565492437  | 5.218981245 | -0.078014350 |
| H  | -0.333536641 | 6.473241972 | -1.344028683 |
| H  | 0.321695414  | 2.841457547 | 0.863929688  |
| H  | 2.076996649  | 7.008885538 | -1.174606698 |
| H  | 2.738885568  | 3.358899588 | 1.003763130  |
| H  | 3.623682823  | 5.454545373 | -0.005438562 |
| C  | -2.739094987 | 5.540170914 | -1.223868639 |
| C  | -2.956635843 | 5.548955528 | -2.608924169 |
| C  | -3.138695646 | 6.645166157 | -0.454235484 |
| C  | -3.554292264 | 6.653383335 | -3.219016022 |
| C  | -3.725215633 | 7.748523631 | -1.073001580 |
| C  | -3.935830439 | 7.756846573 | -2.453948160 |
| H  | -2.661985425 | 4.696628594 | -3.213279381 |
| H  | -2.994584494 | 6.631294765 | 0.620286900  |
| H  | -3.720299500 | 6.649511003 | -4.293068057 |
| H  | -4.032631644 | 8.598490536 | -0.469883004 |
| H  | -4.401404949 | 8.615468796 | -2.930317677 |
| C  | -1.911620023 | 2.774154985 | -1.587810162 |
| C  | -0.913850479 | 2.643496500 | -2.565398351 |
| C  | -2.936381257 | 1.819375435 | -1.528618938 |
| C  | -0.952224581 | 1.580131873 | -3.468552560 |
| C  | -2.977102459 | 0.760053088 | -2.433249363 |
| C  | -1.982724520 | 0.638476533 | -3.405446451 |
| H  | -0.105640131 | 3.367503186 | -2.616828875 |
| H  | -3.718414251 | 1.895856497 | -0.783355651 |
| H  | -0.174054932 | 1.486018963 | -4.221477433 |

|   |              |              |              |
|---|--------------|--------------|--------------|
| H | -3.788454225 | 0.041868130  | -2.360652558 |
| H | -2.005693984 | -0.188160279 | -4.110639319 |
| C | -6.873092217 | 1.400994192  | -1.263943132 |
| O | -5.811703539 | 0.680365327  | -0.562337290 |
| C | -7.942298822 | 1.613695088  | -0.122372690 |
| C | -7.337369392 | 0.541810309  | -2.435319025 |
| C | -6.275740134 | 2.718619464  | -1.773297713 |
| B | -5.943102513 | 1.019049673  | 0.771535136  |
| O | -7.127249771 | 1.630606326  | 1.079718464  |
| N | -4.918702766 | 0.767461933  | 1.734816209  |
| C | -8.911519718 | 0.433960430  | 0.017729187  |
| C | -8.704200242 | 2.933181707  | -0.198715182 |
| H | -9.610509032 | 0.385328652  | -0.822991008 |
| H | -8.368604186 | -0.514127206 | 0.076751762  |
| H | -9.485215758 | 0.555052930  | 0.940581460  |
| H | -6.523485731 | 0.444573899  | -3.160086792 |
| H | -7.628130590 | -0.459753278 | -2.113517470 |
| H | -8.188113508 | 1.009629736  | -2.941835786 |
| H | -5.444258052 | 2.501144155  | -2.448069227 |
| H | -7.020679479 | 3.297499530  | -2.327314012 |
| H | -5.898015928 | 3.332049825  | -0.949943675 |
| H | -9.252267406 | 3.010511520  | -1.144081581 |
| H | -9.426808063 | 2.986419329  | 0.620792565  |
| H | -8.024879311 | 3.781681647  | -0.106244535 |
| C | -2.399631638 | 1.433491720  | 2.870252540  |
| C | -3.600292119 | 2.142476981  | 3.289525166  |
| C | -2.602254284 | 0.205208550  | 2.054480114  |
| H | -1.551249051 | 1.457085217  | 3.555088239  |
| C | -4.924218521 | 1.449925062  | 3.040772348  |
| H | -3.543411561 | 2.717441526  | 4.210131293  |
| H | -5.737141686 | 2.176507667  | 3.045192431  |
| H | -5.113563230 | 0.703980955  | 3.831815184  |
| C | -3.791432722 | 0.001867508  | 1.450738887  |
| H | -3.924008347 | -0.765135121 | 0.693074398  |
| H | -1.752115138 | -0.421244689 | 1.810268615  |

7

|    |              |             |              |
|----|--------------|-------------|--------------|
| Rh | -1.983420773 | 2.395504038 | 1.346630305  |
| Cl | -4.225464715 | 3.129631298 | 0.646353356  |
| H  | 0.172339077  | 0.389545334 | 0.307569110  |
| P  | -0.859551442 | 3.495094881 | -0.352359523 |
| C  | -0.751145332 | 4.986329054 | 4.420727602  |
| O  | -0.654318115 | 3.765331475 | 3.636037936  |
| C  | -1.243634235 | 6.036072870 | 3.357100597  |
| C  | 0.618900560  | 5.278743267 | 5.023847442  |
| C  | -1.781956655 | 4.717682716 | 5.522837340  |
| B  | -1.491413347 | 3.902553673 | 2.540182360  |
| O  | -1.951094323 | 5.195528919 | 2.405041592  |
| C  | -0.099098352 | 6.717725686 | 2.599169686  |
| C  | -2.220073721 | 7.082895624 | 3.886138779  |
| H  | 0.422316501  | 7.441514813 | 3.233283988  |
| H  | 0.625264506  | 5.991016686 | 2.229381322  |
| H  | -0.513690667 | 7.245646282 | 1.736158240  |
| H  | 0.880211501  | 4.494858845 | 5.740958481  |
| H  | 1.391568737  | 5.306150919 | 4.253389434  |
| H  | 0.613477515  | 6.237960593 | 5.552654360  |
| H  | -1.457368452 | 3.852115623 | 6.107537724  |

|   |              |              |              |
|---|--------------|--------------|--------------|
| H | -1.886648674 | 5.572650831  | 6.197554100  |
| H | -2.760635696 | 4.489733707  | 5.090892289  |
| H | -1.755083200 | 7.681773755  | 4.676957700  |
| H | -2.508526260 | 7.756008367  | 3.073535717  |
| H | -3.127965755 | 6.622517928  | 4.278781214  |
| C | -1.747258305 | 4.740983755  | -1.366799780 |
| C | -1.599945460 | 4.787904571  | -2.761470529 |
| C | -2.557247933 | 5.690142960  | -0.724770082 |
| C | -2.241710263 | 5.780454595  | -3.504111264 |
| C | -3.189164386 | 6.682718354  | -1.473832045 |
| C | -3.034470015 | 6.732340956  | -2.860868207 |
| H | -0.985800504 | 4.051582579  | -3.270849993 |
| H | -2.696252679 | 5.641911017  | 0.348184543  |
| H | -2.121705862 | 5.807103682  | -4.583991358 |
| H | -3.818132776 | 7.411567543  | -0.970004094 |
| H | -3.535469369 | 7.504055064  | -3.439505314 |
| C | -0.364352992 | 2.214953624  | -1.577363535 |
| C | 0.914872989  | 2.140318689  | -2.143946784 |
| C | -1.321679236 | 1.245589607  | -1.914938287 |
| C | 1.227167991  | 1.109062815  | -3.033112445 |
| C | -1.006789959 | 0.215840539  | -2.797157618 |
| C | 0.270980420  | 0.145995793  | -3.359189354 |
| H | 1.667858998  | 2.879556917  | -1.888797123 |
| H | -2.309016297 | 1.282119496  | -1.471294510 |
| H | 2.222516715  | 1.057418562  | -3.466592088 |
| H | -1.757954616 | -0.537003290 | -3.015849902 |
| H | 0.523319456  | -0.659801977 | -4.043298567 |
| C | 0.732427324  | 4.329730929  | 0.046721462  |
| C | 1.564707196  | 3.754122067  | 1.018520532  |
| C | 1.140868517  | 5.513750036  | -0.583652165 |
| C | 2.780895274  | 4.347421005  | 1.352781107  |
| C | 2.355493397  | 6.110722422  | -0.241894646 |
| C | 3.176963218  | 5.531383659  | 0.726125817  |
| H | 1.243293486  | 2.853869888  | 1.526182483  |
| H | 0.506684251  | 5.976562722  | -1.332355427 |
| H | 3.411531024  | 3.892081534  | 2.111484687  |
| H | 2.655885258  | 7.034059236  | -0.729732908 |
| H | 4.118783244  | 6.002266455  | 0.994511737  |
| C | -5.980318988 | -0.576271044 | -0.448510395 |
| O | -5.126355901 | -0.194802434 | 0.664301667  |
| C | -4.980699681 | -0.579868629 | -1.672694331 |
| C | -7.108268567 | 0.446179566  | -0.552547548 |
| C | -6.531942655 | -1.967774513 | -0.118391331 |
| B | -3.836808184 | -0.415034606 | 0.278146654  |
| O | -3.692624645 | -0.833035624 | -1.025806662 |
| N | -2.716088804 | -0.221139017 | 1.161028395  |
| C | -4.877427193 | 0.782265727  | -2.368563060 |
| C | -5.219693943 | -1.683930802 | -2.697297528 |
| H | -5.798722119 | 1.016612116  | -2.910279289 |
| H | -4.679455797 | 1.584113048  | -1.651249975 |
| H | -4.057237634 | 0.753346116  | -3.091959434 |
| H | -7.758724704 | 0.363205973  | 0.323201288  |
| H | -6.708940440 | 1.461123466  | -0.580353471 |
| H | -7.714065668 | 0.266078050  | -1.447337979 |
| H | -7.054178710 | -1.922046610 | 0.841118611  |
| H | -7.236227000 | -2.312768331 | -0.881634747 |
| H | -5.723798787 | -2.700316858 | -0.030829182 |
| H | -6.211884857 | -1.580600806 | -3.148708942 |

|   |              |              |              |
|---|--------------|--------------|--------------|
| H | -4.475650303 | -1.608960987 | -3.496020148 |
| H | -5.139181724 | -2.676428844 | -2.250430029 |
| C | -0.522508907 | 1.064992618  | 2.243269985  |
| C | -0.202966087 | -0.039004585 | 1.241308904  |
| C | -1.733159704 | 0.969436132  | 3.020015395  |
| H | 0.330042240  | 1.500892307  | 2.756614225  |
| C | -1.434097317 | -0.925565386 | 0.967429779  |
| H | 0.600468489  | -0.679976002 | 1.633187358  |
| H | -1.420639215 | -1.780968842 | 1.657092277  |
| H | -1.418563943 | -1.312816059 | -0.052716876 |
| C | -2.868725743 | 0.522342820  | 2.339451631  |
| H | -3.876539834 | 0.626366323  | 2.724147882  |
| H | -1.825943566 | 1.439029353  | 3.991559379  |

7'

|    |              |             |              |
|----|--------------|-------------|--------------|
| Rh | -2.845683397 | 2.658446255 | 0.843427769  |
| Cl | -4.639122993 | 4.265029322 | 1.406771345  |
| H  | -1.956532592 | 0.978803451 | -1.714298267 |
| P  | -1.711797709 | 4.056549059 | -0.504727629 |
| C  | 0.449899305  | 3.152747501 | 3.430700796  |
| O  | -0.182369370 | 3.278777008 | 2.128343150  |
| C  | -0.773270117 | 3.314481360 | 4.405301507  |
| C  | 1.523871634  | 4.230123557 | 3.547809017  |
| C  | 1.074188186  | 1.753459745 | 3.478414142  |
| B  | -1.525948313 | 2.972446802 | 2.274113911  |
| O  | -1.876377497 | 2.822383235 | 3.595160843  |
| C  | -1.085471226 | 4.777426356 | 4.739817557  |
| C  | -0.697511106 | 2.476087506 | 5.677898683  |
| H  | -0.330025488 | 5.206656975 | 5.405768039  |
| H  | -1.139180264 | 5.382777908 | 3.832039482  |
| H  | -2.058555150 | 4.825736671 | 5.235527330  |
| H  | 2.327033194  | 4.028747565 | 2.832053388  |
| H  | 1.119167658  | 5.218928774 | 3.325556906  |
| H  | 1.957483576  | 4.238398414 | 4.553731557  |
| H  | 1.775083685  | 1.647412775 | 2.645156951  |
| H  | 1.617914725  | 1.583107707 | 4.412412370  |
| H  | 0.305882671  | 0.981729793 | 3.374663043  |
| H  | 0.191277399  | 2.738630181 | 6.262283022  |
| H  | -1.579444830 | 2.664248442 | 6.296886948  |
| H  | -0.669519759 | 1.408990980 | 5.450927569  |
| C  | -0.930486686 | 5.532862932 | 0.260944225  |
| C  | -1.681023937 | 6.249301208 | 1.206986028  |
| C  | 0.363245371  | 5.960019166 | -0.061861227 |
| C  | -1.130969437 | 7.371549631 | 1.825915011  |
| C  | 0.910120168  | 7.079732863 | 0.569260497  |
| C  | 0.168485417  | 7.785293411 | 1.518167183  |
| H  | -2.684513965 | 5.916198896 | 1.461940600  |
| H  | 0.953204552  | 5.416522663 | -0.792366479 |
| H  | -1.718589864 | 7.917276154 | 2.559105866  |
| H  | 1.918883429  | 7.396658409 | 0.318262460  |
| H  | 0.596838897  | 8.654574237 | 2.009655630  |
| C  | -2.853571305 | 4.763176008 | -1.757385591 |
| C  | -3.969220946 | 4.022484327 | -2.173951941 |
| C  | -2.611397595 | 6.021023019 | -2.327382638 |
| C  | -4.824025531 | 4.531296595 | -3.150566732 |
| C  | -3.471685949 | 6.528287625 | -3.300721134 |
| C  | -4.578198315 | 5.784610065 | -3.713988285 |

|   |              |              |              |
|---|--------------|--------------|--------------|
| H | -4.181816989 | 3.055396812  | -1.727157215 |
| H | -1.756193963 | 6.607408974  | -2.005509393 |
| H | -5.690801944 | 3.953957952  | -3.459726867 |
| H | -3.279572070 | 7.507020047  | -3.731722434 |
| H | -5.251249960 | 6.183934400  | -4.467849545 |
| C | -0.387544065 | 3.273919604  | -1.512939678 |
| C | 0.735472366  | 2.725569391  | -0.868150192 |
| C | -0.501506060 | 3.150137772  | -2.905359891 |
| C | 1.721012149  | 2.074296877  | -1.607652807 |
| C | 0.486477418  | 2.488675120  | -3.638813585 |
| C | 1.599633595  | 1.949224236  | -2.994479464 |
| H | 0.823737777  | 2.815353832  | 0.209136587  |
| H | -1.360369568 | 3.567804708  | -3.420287689 |
| H | 2.585570612  | 1.657884755  | -1.097445738 |
| H | 0.382355290  | 2.398789752  | -4.716750502 |
| H | 2.366559706  | 1.434934334  | -3.566882403 |
| C | -6.562211698 | 1.255492972  | 3.957055811  |
| O | -6.054545977 | 1.184686279  | 2.595415624  |
| C | -5.240831612 | 1.428281598  | 4.809163329  |
| C | -7.287199095 | -0.068274935 | 4.224038314  |
| C | -7.530766271 | 2.431389592  | 4.038858893  |
| B | -4.726155353 | 0.875323131  | 2.687742731  |
| O | -4.236235450 | 0.792183575  | 3.960379447  |
| N | -3.918350544 | 0.652383809  | 1.508393712  |
| C | -5.245619349 | 0.710492437  | 6.154100437  |
| C | -4.825114041 | 2.892778775  | 4.983979945  |
| H | -6.039580313 | 1.105259367  | 6.796875342  |
| H | -5.388924267 | -0.365559680 | 6.039792565  |
| H | -4.287385487 | 0.874571501  | 6.655498705  |
| H | -8.067649546 | -0.202980761 | 3.469797093  |
| H | -6.597184111 | -0.914535090 | 4.154644236  |
| H | -7.755113225 | -0.078303277 | 5.213171507  |
| H | -8.414299501 | 2.222232385  | 3.428125627  |
| H | -7.858432590 | 2.591287024  | 5.071753246  |
| H | -7.066309109 | 3.343217376  | 3.661199427  |
| H | -5.507665112 | 3.415107433  | 5.662250310  |
| H | -3.816935969 | 2.920377928  | 5.401359243  |
| H | -4.796702833 | 3.416640803  | 4.025222476  |
| C | -2.314345496 | 0.347518901  | -0.892548998 |
| C | -1.814948072 | 0.867332087  | 0.456901697  |
| C | -3.827889750 | 0.317013957  | -0.887975110 |
| H | -1.918078348 | -0.662429754 | -1.100958690 |
| C | -2.532753060 | 0.094285415  | 1.563945046  |
| H | -0.728170070 | 0.868107661  | 0.541342493  |
| H | -2.134089571 | 0.290612283  | 2.560594011  |
| H | -2.573172507 | -0.996236700 | 1.404283489  |
| C | -4.541558634 | 0.504914757  | 0.237739506  |
| H | -5.622777176 | 0.580942668  | 0.252391038  |
| H | -4.362633943 | 0.171354664  | -1.822256705 |

8

|    |              |              |              |
|----|--------------|--------------|--------------|
| Rh | -3.346165953 | 1.754886316  | 2.734309442  |
| Cl | -2.988206722 | 3.790758102  | 4.144632310  |
| H  | -5.355171968 | -2.316641674 | 4.514053937  |
| C  | -0.431871660 | 2.312584617  | -0.207161216 |
| O  | -0.901370719 | 1.814827348  | 1.076957838  |
| C  | -1.671759377 | 2.050760349  | -1.137050984 |



|   |              |              |              |
|---|--------------|--------------|--------------|
| C | 0.832597541  | 1.549736771  | -0.588053030 |
| C | -0.124967972 | 3.803014456  | -0.019782975 |
| B | -2.284231505 | 1.895313063  | 1.081709415  |
| O | -2.772701915 | 2.117331557  | -0.194446534 |
| C | -1.688943514 | 0.643593023  | -1.745437751 |
| C | -1.904955858 | 3.104430846  | -2.217370248 |
| H | -0.926367368 | 0.530976573  | -2.522590790 |
| H | -1.522336994 | -0.119105598 | -0.980189567 |
| H | -2.670333285 | 0.460550506  | -2.192383688 |
| H | 1.630790986  | 1.786012800  | 0.121456366  |
| H | 0.670585456  | 0.470183974  | -0.570024623 |
| H | 1.170293305  | 1.836189408  | -1.589896018 |
| H | 0.597977700  | 3.914771335  | 0.792717292  |
| H | 0.296834672  | 4.243593806  | -0.928851277 |
| H | -1.027262333 | 4.356074451  | 0.251656085  |
| H | -1.042166345 | 3.169919874  | -2.889246336 |
| H | -2.780492994 | 2.831512655  | -2.814897070 |
| H | -2.093144414 | 4.086541650  | -1.780464076 |
| C | -6.184641632 | 1.750643531  | 0.617831382  |
| P | -5.109424674 | 2.811960341  | 1.677951513  |
| C | -6.320763816 | 3.469222509  | 2.898248175  |
| C | -4.723591430 | 4.267549901  | 0.619752806  |
| C | -5.766066060 | 1.378534438  | -0.671726920 |
| C | -7.377295361 | 1.211740191  | 1.122216493  |
| C | -6.531368192 | 0.500674821  | -1.436941687 |
| H | -4.832525093 | 1.768087645  | -1.058180105 |
| C | -7.717058738 | -0.031691583 | -0.926008260 |
| H | -6.196373102 | 0.226852735  | -2.434115149 |
| C | -8.135362641 | 0.324874474  | 0.355234021  |
| H | -9.057057493 | -0.082571120 | 0.761760742  |
| H | -8.309140471 | -0.720236295 | -1.522812390 |
| C | -7.260809937 | 4.442126807  | 2.530039743  |
| C | -6.355286193 | 2.946132893  | 4.197268867  |
| C | -8.217878703 | 4.879838223  | 3.443919102  |
| H | -7.241872946 | 4.864997474  | 1.530537978  |
| C | -7.317058335 | 3.380272841  | 5.108994572  |
| H | -5.622403785 | 2.208438066  | 4.503453887  |
| C | -8.249383459 | 4.348342125  | 4.734531185  |
| H | -8.937332769 | 5.638514397  | 3.148013711  |
| H | -7.329624061 | 2.969289458  | 6.114634386  |
| H | -8.994638719 | 4.691869249  | 5.446798737  |
| C | -5.489083850 | 4.594607723  | -0.508782231 |
| C | -3.639288172 | 5.084832290  | 0.972694168  |
| C | -5.167532188 | 5.713126120  | -1.279968583 |
| H | -6.330860016 | 3.974058331  | -0.798296140 |
| C | -3.325795077 | 6.202826400  | 0.200693584  |
| H | -3.054168457 | 4.847917450  | 1.856129021  |
| C | -4.084700498 | 6.519228679  | -0.928397977 |
| H | -5.765929123 | 5.951989903  | -2.155224609 |
| H | -2.484099594 | 6.828159573  | 0.485827638  |
| H | -3.833993348 | 7.388474427  | -1.530615802 |
| H | -7.722687845 | 1.487665957  | 2.113265416  |
| O | -3.779847762 | -3.663568397 | 5.889793886  |
| C | -2.892591594 | -4.080818554 | 6.957642949  |
| C | -1.594419241 | -4.495480601 | 6.167228162  |
| C | -3.559668450 | -5.209720919 | 7.737259469  |
| C | -2.673826548 | -2.861732157 | 7.862691088  |
| O | -1.637114375 | -3.610296183 | 5.020330660  |

|   |              |              |             |
|---|--------------|--------------|-------------|
| N | -3.425994449 | -2.520157581 | 3.736298743 |
| C | -1.656317750 | -5.931472800 | 5.632594873 |
| C | -0.284537689 | -4.260121228 | 6.913741493 |
| H | -1.549110049 | -6.668292967 | 6.434309134 |
| H | -2.600768363 | -6.112949271 | 5.111872776 |
| H | -0.841369469 | -6.075541223 | 4.917731403 |
| H | -4.446187128 | -4.829511987 | 8.253163598 |
| H | -3.874613269 | -6.018713451 | 7.076019859 |
| H | -2.875075379 | -5.616062643 | 8.489678960 |
| H | -3.647434722 | -2.498015631 | 8.203528224 |
| H | -2.065983133 | -3.108609061 | 8.738494321 |
| H | -2.185573444 | -2.053851622 | 7.311277861 |
| H | -0.256887492 | -4.839572479 | 7.842791321 |
| H | 0.557403821  | -4.574855116 | 6.289793020 |
| H | -0.151183031 | -3.203510260 | 7.152522386 |
| C | -3.976942886 | -0.182191390 | 2.092070669 |
| C | -4.868265170 | -0.573649678 | 3.288545515 |
| C | -4.815806338 | -2.078577510 | 3.594385299 |
| H | -5.902569514 | -0.260577729 | 3.107280363 |
| C | -2.866400616 | -1.136886470 | 1.854564877 |
| H | -4.561167630 | -0.063488980 | 1.179447211 |
| H | -2.214619174 | -0.962846939 | 1.003258977 |
| H | -4.541524976 | -0.057569671 | 4.206072367 |
| C | -2.583816600 | -2.167629285 | 2.669185997 |
| H | -1.699709558 | -2.787403825 | 2.552818246 |
| H | -5.281190511 | -2.632658842 | 2.766656190 |
| B | -2.963677901 | -3.254636769 | 4.849336045 |
| N | -1.827158653 | 0.835795282  | 4.011381284 |
| C | -2.077496356 | 0.912076132  | 5.332236917 |
| C | -0.700279436 | 0.222705477  | 3.607929505 |
| C | -1.231061100 | 0.363693896  | 6.289825823 |
| C | 0.204267895  | -0.337404773 | 4.504950681 |
| C | -0.063673304 | -0.271439952 | 5.869452223 |
| H | -2.971023918 | 1.453776708  | 5.619923526 |
| H | -0.530011460 | 0.198598693  | 2.542090444 |
| H | -1.483423600 | 0.451818707  | 7.341282580 |
| H | 1.101525935  | -0.817274219 | 4.128557321 |
| H | 0.622451778  | -0.705377840 | 6.591327924 |

8'

|    |              |             |             |
|----|--------------|-------------|-------------|
| Rh | -2.834317290 | 4.266214875 | 3.401487405 |
| Cl | -3.840649115 | 6.296639284 | 4.433586978 |
| H  | -4.614279771 | 1.947288914 | 2.618124833 |
| P  | -2.707313530 | 5.365062061 | 1.368309417 |
| C  | 1.237871171  | 4.260421951 | 4.444179977 |
| O  | -0.172006049 | 3.976594041 | 4.671954352 |
| C  | 1.356764948  | 4.151045061 | 2.877325678 |
| C  | 2.053170428  | 3.231175081 | 5.221780653 |
| C  | 1.488015537  | 5.678553282 | 4.968608604 |
| B  | -0.866454354 | 4.235230728 | 3.503795855 |
| O  | 0.003313047  | 4.445360113 | 2.449778206 |
| C  | 1.684895055  | 2.734743930 | 2.385580123 |
| C  | 2.286436835  | 5.172246469 | 2.224480387 |
| H  | 2.717806355  | 2.461449767 | 2.624627205 |
| H  | 1.021783677  | 1.987838943 | 2.826186061 |
| H  | 1.567067276  | 2.698408841 | 1.298101226 |
| H  | 1.912077410  | 3.387183294 | 6.295703948 |



|   |              |              |              |
|---|--------------|--------------|--------------|
| H | 0.029685803  | 2.445151065  | -0.895002547 |
| H | -1.673180271 | 0.638012524  | -0.621071619 |
| H | -2.190700510 | 1.575377995  | 0.772724436  |
| H | -0.175046915 | -0.715067818 | 0.728020065  |
| H | 1.783346802  | 2.599620134  | 0.860772442  |
| H | 1.642938915  | 1.305822649  | 2.997265600  |

**8<sup>l</sup><sub>sub-opt</sub>**

|   |              |              |              |
|---|--------------|--------------|--------------|
| C | -1.633860635 | 0.122826419  | -2.204697898 |
| H | -2.263889176 | 0.437482725  | -3.058618118 |
| C | -2.422440220 | -0.334158001 | 4.239755610  |
| O | -2.480930733 | -0.840511255 | 2.902078648  |
| C | -1.006976967 | 0.349583823  | 4.274045160  |
| C | -2.602081997 | -1.492900818 | 5.220131687  |
| C | -3.564762815 | 0.681137256  | 4.407781858  |
| B | -1.645425974 | -0.020100814 | 2.111547755  |
| O | -0.857976101 | 0.811216351  | 2.929021732  |
| C | 0.121490491  | -0.658138686 | 4.550797193  |
| C | -0.889579713 | 1.541904697  | 5.223457103  |
| H | -3.611733413 | -1.905159271 | 5.123648667  |
| H | -1.891294348 | -2.295689198 | 5.014350945  |
| H | -2.465930454 | -1.156168505 | 6.254585573  |
| H | -4.507295226 | 0.188969151  | 4.151562912  |
| H | -3.633235811 | 1.063198454  | 5.432378057  |
| H | -3.427021066 | 1.523050627  | 3.723682153  |
| N | -1.606242731 | -0.030227319 | 0.725102163  |
| C | -0.597490018 | 0.761124484  | -0.086321992 |
| C | -2.420079539 | -0.876493076 | -0.046468704 |
| H | 0.127196877  | -1.000528668 | 5.591703905  |
| H | 0.024503843  | -1.526089282 | 3.892536721  |
| H | 1.078340842  | -0.175296784 | 4.333013322  |
| H | -1.091801049 | 1.242464457  | 6.258424299  |
| H | 0.124427209  | 1.951625944  | 5.175104351  |
| H | -1.584286555 | 2.335800631  | 4.942531385  |
| C | -1.230503345 | 1.295949924  | -1.329662500 |
| C | -2.419293833 | -0.884186657 | -1.388935284 |
| H | -0.804108031 | -0.479186575 | -2.697517360 |
| H | -0.506994948 | 1.950764254  | -1.848476417 |
| H | -3.043558810 | -1.627151503 | -1.888984853 |
| H | -0.214328728 | 1.554866170  | 0.567505139  |
| H | 0.252970282  | 0.011401688  | -0.187500298 |
| H | -3.022694204 | -1.573957181 | 0.533535625  |

**8<sub>cat-opt</sub>**

|    |              |              |              |
|----|--------------|--------------|--------------|
| Rh | -2.250095999 | 0.040176975  | 0.966924335  |
| Cl | -2.834970549 | 2.002646495  | -0.086567220 |
| B  | -3.890006290 | 0.076736523  | 2.123899047  |
| P  | -0.864882614 | 0.852743731  | 2.591931451  |
| N  | -3.241414137 | -1.186599622 | -0.480284180 |
| O  | -5.105368487 | 0.476478547  | 1.669214414  |
| C  | -5.997435764 | 0.501937486  | 2.840642845  |
| C  | -5.297241807 | -0.520998484 | 3.809950593  |
| C  | -7.395301729 | 0.105998042  | 2.384764545  |
| C  | -5.978130875 | 1.940017342  | 3.363257281  |
| O  | -3.884879056 | -0.400816249 | 3.404611454  |
| C  | -5.696365197 | -1.975565089 | 3.551028281  |

|   |              |              |              |
|---|--------------|--------------|--------------|
| C | -5.390358197 | -0.180886893 | 5.291313372  |
| H | -7.792711626 | 0.870493373  | 1.712120127  |
| H | -7.391768565 | -0.847201761 | 1.853382067  |
| H | -8.068810489 | 0.025612489  | 3.244030921  |
| H | -6.272326719 | 2.615218768  | 2.555959716  |
| H | -6.674743120 | 2.067475363  | 4.196728254  |
| H | -4.976571042 | 2.223312716  | 3.698364365  |
| H | -6.721860882 | -2.169893374 | 3.876685106  |
| H | -5.615152208 | -2.223774945 | 2.488522160  |
| H | -5.028482849 | -2.635863478 | 4.111518833  |
| H | -6.436850639 | -0.156297825 | 5.611625833  |
| H | -4.872233000 | -0.943612905 | 5.879378875  |
| H | -4.928781224 | 0.782938081  | 5.509818514  |
| C | -0.340997836 | -0.893091355 | 2.447765454  |
| C | -1.269110790 | -1.908292865 | 2.797773487  |
| C | 0.816852940  | -1.240889923 | 1.713127176  |
| C | 0.517581305  | 1.940989559  | 2.178844485  |
| C | -1.425612322 | 1.247352895  | 4.265694073  |
| C | 1.432495796  | 2.326887044  | 3.173716998  |
| C | 0.689982619  | 2.372435119  | 0.853603884  |
| C | -1.138150581 | 0.432840158  | 5.368499518  |
| C | -2.184498281 | 2.417311532  | 4.431571579  |
| C | -1.024779707 | -3.236850427 | 2.417878989  |
| H | -2.134470663 | -1.671128991 | 3.406471164  |
| C | 1.041803474  | -2.563623612 | 1.352518319  |
| H | 1.528385282  | -0.470289033 | 1.432887597  |
| C | 0.118328483  | -3.564998136 | 1.695333935  |
| H | -1.732977409 | -4.008399162 | 2.704881399  |
| H | 0.306580241  | -4.595253026 | 1.408756560  |
| H | 1.941404356  | -2.822954980 | 0.802307395  |
| C | 2.522472923  | 3.124385632  | 2.835008018  |
| H | 1.288848253  | 2.011605570  | 4.203156897  |
| C | 1.785546961  | 3.171073423  | 0.526695495  |
| H | -0.039991302 | 2.111236302  | 0.094066931  |
| C | 2.700160450  | 3.543722866  | 1.513251056  |
| H | 3.230711699  | 3.423101261  | 3.601724841  |
| H | 1.915689009  | 3.511703159  | -0.495895861 |
| H | 3.548655140  | 4.170492332  | 1.255265321  |
| C | -1.616358709 | 0.786034022  | 6.631216986  |
| H | -0.551754402 | -0.472445789 | 5.245561640  |
| C | -2.652675389 | 2.765049412  | 5.697055297  |
| H | -2.416290989 | 3.046145717  | 3.575359355  |
| C | -2.373966275 | 1.947268815  | 6.797039452  |
| H | -1.393939873 | 0.153825377  | 7.485613777  |
| H | -3.237458603 | 3.671069913  | 5.824395635  |
| H | -2.743528734 | 2.218145650  | 7.781368499  |
| C | -4.378544718 | -0.803110799 | -1.094358989 |
| C | -2.691408848 | -2.379093237 | -0.790131766 |
| C | -5.000571176 | -1.607166118 | -2.044043307 |
| H | -4.776338750 | 0.160077258  | -0.799759032 |
| C | -3.255753674 | -3.230106387 | -1.731140533 |
| H | -1.776933932 | -2.642537744 | -0.266256356 |
| C | -4.433023192 | -2.837742093 | -2.370819282 |
| H | -5.914255700 | -1.264233164 | -2.517249903 |
| H | -2.778633209 | -4.178112834 | -1.955271740 |
| H | -4.898480643 | -3.481813932 | -3.110661035 |

**8<sub>cat</sub>**

|    |              |              |              |
|----|--------------|--------------|--------------|
| Rh | -3.346165953 | 1.754886316  | 2.734309442  |
| Cl | -2.988206722 | 3.790758102  | 4.144632310  |
| C  | -0.431871660 | 2.312584617  | -0.207161216 |
| O  | -0.901370719 | 1.814827348  | 1.076957838  |
| C  | -1.671759377 | 2.050760349  | -1.137050984 |
| C  | 0.832597541  | 1.549736771  | -0.588053030 |
| C  | -0.124967971 | 3.803014456  | -0.019782975 |
| B  | -2.284231505 | 1.895313063  | 1.081709414  |
| O  | -2.772701915 | 2.117331556  | -0.194446534 |
| C  | -1.688943514 | 0.643593023  | -1.745437751 |
| C  | -1.904955858 | 3.104430846  | -2.217370248 |
| H  | -0.926367368 | 0.530976572  | -2.522590790 |
| H  | -1.522336994 | -0.119105598 | -0.980189567 |
| H  | -2.670333284 | 0.460550506  | -2.192383688 |
| H  | 1.630790986  | 1.786012800  | 0.121456366  |
| H  | 0.670585456  | 0.470183974  | -0.570024623 |
| H  | 1.170293305  | 1.836189408  | -1.589896018 |
| H  | 0.597977700  | 3.914771335  | 0.792717292  |
| H  | 0.296834672  | 4.243593806  | -0.928851277 |
| H  | -1.027262333 | 4.356074451  | 0.251656084  |
| H  | -1.042166345 | 3.169919874  | -2.889246336 |
| H  | -2.780492994 | 2.831512655  | -2.814897070 |
| H  | -2.093144414 | 4.086541650  | -1.780464076 |
| C  | -6.184641632 | 1.750643531  | 0.617831382  |
| P  | -5.109424674 | 2.811960341  | 1.677951513  |
| C  | -6.320763816 | 3.469222509  | 2.898248175  |
| C  | -4.723591429 | 4.267549901  | 0.619752806  |
| C  | -5.766066060 | 1.378534438  | -0.671726920 |
| C  | -7.377295361 | 1.211740191  | 1.122216493  |
| C  | -6.531368192 | 0.500674821  | -1.436941687 |
| H  | -4.832525093 | 1.768087645  | -1.058180105 |
| C  | -7.717058738 | -0.031691583 | -0.926008260 |
| H  | -6.196373102 | 0.226852735  | -2.434115149 |
| C  | -8.135362641 | 0.324874474  | 0.355234021  |
| H  | -9.057057493 | -0.082571120 | 0.761760742  |
| H  | -8.309140471 | -0.720236295 | -1.522812390 |
| C  | -7.260809937 | 4.442126807  | 2.530039743  |
| C  | -6.355286193 | 2.946132893  | 4.197268867  |
| C  | -8.217878703 | 4.879838223  | 3.443919102  |
| H  | -7.241872946 | 4.864997474  | 1.530537978  |
| C  | -7.317058335 | 3.380272840  | 5.108994572  |
| H  | -5.622403785 | 2.208438066  | 4.503453887  |
| C  | -8.249383459 | 4.348342125  | 4.734531185  |
| H  | -8.937332769 | 5.638514397  | 3.148013711  |
| H  | -7.329624061 | 2.969289458  | 6.114634386  |
| H  | -8.994638719 | 4.691869248  | 5.446798737  |
| C  | -5.489083850 | 4.594607723  | -0.508782231 |
| C  | -3.639288172 | 5.084832290  | 0.972694168  |
| C  | -5.167532187 | 5.713126120  | -1.279968583 |
| H  | -6.330860016 | 3.974058331  | -0.798296140 |
| C  | -3.325795077 | 6.202826400  | 0.200693584  |
| H  | -3.054168457 | 4.847917450  | 1.856129021  |
| C  | -4.084700498 | 6.519228679  | -0.928397977 |
| H  | -5.765929123 | 5.951989903  | -2.155224609 |
| H  | -2.484099593 | 6.828159573  | 0.485827638  |
| H  | -3.833993348 | 7.388474427  | -1.530615802 |
| H  | -7.722687845 | 1.487665957  | 2.113265416  |

|   |              |              |             |
|---|--------------|--------------|-------------|
| N | -1.827158653 | 0.835795282  | 4.011381283 |
| C | -2.077496356 | 0.912076132  | 5.332236917 |
| C | -0.700279436 | 0.222705477  | 3.607929505 |
| C | -1.231061100 | 0.363693896  | 6.289825823 |
| C | 0.204267895  | -0.337404773 | 4.504950681 |
| C | -0.063673304 | -0.271439952 | 5.869452222 |
| H | -2.971023918 | 1.453776708  | 5.619923526 |
| H | -0.530011460 | 0.198598693  | 2.542090444 |
| H | -1.483423600 | 0.451818707  | 7.341282580 |
| H | 1.101525935  | -0.817274219 | 4.128557321 |
| H | 0.622451778  | -0.705377840 | 6.591327924 |

**8<sup>+</sup><sub>cat</sub>**

|    |              |             |              |
|----|--------------|-------------|--------------|
| Rh | -2.834317290 | 4.266214875 | 3.401487405  |
| Cl | -3.840649115 | 6.296639284 | 4.433586978  |
| P  | -2.707313530 | 5.365062061 | 1.368309417  |
| C  | 1.237871171  | 4.260421951 | 4.444179977  |
| O  | -0.172006049 | 3.976594041 | 4.671954352  |
| C  | 1.356764948  | 4.151045061 | 2.877325678  |
| C  | 2.053170428  | 3.231175081 | 5.221780653  |
| C  | 1.488015537  | 5.678553282 | 4.968608604  |
| B  | -0.866454353 | 4.235230728 | 3.503795855  |
| O  | 0.003313047  | 4.445360113 | 2.449778206  |
| C  | 1.684895055  | 2.734743930 | 2.385580123  |
| C  | 2.286436834  | 5.172246469 | 2.224480387  |
| H  | 2.717806355  | 2.461449767 | 2.624627205  |
| H  | 1.021783677  | 1.987838943 | 2.826186061  |
| H  | 1.567067276  | 2.698408840 | 1.298101225  |
| H  | 1.912077410  | 3.387183294 | 6.295703947  |
| H  | 1.736812058  | 2.214724762 | 4.978798819  |
| H  | 3.121232367  | 3.334762667 | 5.001643779  |
| H  | 1.202366856  | 5.723066280 | 6.023293279  |
| H  | 2.542008272  | 5.959926445 | 4.879910283  |
| H  | 0.882123949  | 6.407462747 | 4.422724398  |
| H  | 3.311677047  | 5.057627254 | 2.592667954  |
| H  | 2.293452917  | 5.018327131 | 1.141090215  |
| H  | 1.950814810  | 6.193892467 | 2.410236457  |
| C  | -4.330325322 | 6.149691333 | 1.025143862  |
| C  | -4.439409085 | 7.428221897 | 0.466881400  |
| C  | -5.496895519 | 5.427502662 | 1.319134134  |
| C  | -5.696782086 | 7.976752418 | 0.210331958  |
| C  | -6.750275393 | 5.973148065 | 1.053689442  |
| C  | -6.852199580 | 7.252181128 | 0.501248326  |
| H  | -3.545426857 | 8.001077134 | 0.242416627  |
| H  | -5.423435147 | 4.436482973 | 1.759907262  |
| H  | -5.771222441 | 8.974326920 | -0.213871786 |
| H  | -7.647151358 | 5.406091719 | 1.287534940  |
| H  | -7.829759021 | 7.683179389 | 0.303114044  |
| C  | -2.403944240 | 4.379261504 | -0.161561685 |
| C  | -3.398656212 | 4.201631243 | -1.134305303 |
| C  | -1.158196619 | 3.754555140 | -0.344517529 |
| C  | -3.155736210 | 3.411234712 | -2.259573301 |
| C  | -0.920917108 | 2.968583831 | -1.470013788 |
| C  | -1.919264922 | 2.790603608 | -2.429808111 |
| H  | -4.364933533 | 4.680809088 | -1.020463338 |
| H  | -0.384644824 | 3.894585254 | 0.399644798  |
| H  | -3.937650636 | 3.284500204 | -3.003589095 |

|   |              |             |              |
|---|--------------|-------------|--------------|
| H | 0.046842657  | 2.489736906 | -1.594727629 |
| H | -1.733468850 | 2.173092104 | -3.304527238 |
| C | -1.489956861 | 6.739103613 | 1.255102576  |
| C | -0.832259176 | 7.049501489 | 0.057307550  |
| C | -1.216900687 | 7.493378421 | 2.406957830  |
| C | 0.100875629  | 8.087319950 | 0.015582727  |
| C | -0.286578535 | 8.530625184 | 2.357511755  |
| C | 0.379662513  | 8.826554180 | 1.165465734  |
| H | -1.033629729 | 6.476592667 | -0.841875651 |
| H | -1.740192318 | 7.268956886 | 3.331703567  |
| H | 0.610953514  | 8.313950442 | -0.916976230 |
| H | -0.082162840 | 9.108128822 | 3.255206157  |
| H | 1.108380393  | 9.632313845 | 1.132073282  |
| N | -3.325669448 | 3.371423515 | 5.311988467  |
| C | -2.502450068 | 3.109720856 | 6.341701368  |
| C | -4.646991808 | 3.168043056 | 5.472230212  |
| C | -2.974446665 | 2.625000599 | 7.558850660  |
| C | -5.191956496 | 2.675428661 | 6.651150706  |
| C | -4.338959993 | 2.397222762 | 7.718928110  |
| H | -1.452364673 | 3.300993891 | 6.161818823  |
| H | -5.279397581 | 3.426293819 | 4.629200172  |
| H | -2.272120087 | 2.431236927 | 8.363098431  |
| H | -6.263825747 | 2.525365664 | 6.726590288  |
| H | -4.732920757 | 2.017285376 | 8.657221176  |

**8<sub>sub</sub>**

|   |              |              |              |
|---|--------------|--------------|--------------|
| C | -1.245048081 | 0.000000000  | 1.900160779  |
| H | -2.294219867 | -0.138002138 | 2.171406438  |
| C | -2.544945408 | -0.308360057 | 6.051595132  |
| O | -2.312367712 | -0.496311902 | 4.633073175  |
| B | -0.991269663 | -0.148334115 | 4.410537246  |
| C | -1.099711749 | -0.490589219 | 6.651631640  |
| C | -3.571001595 | -1.334999973 | 6.521098254  |
| C | -3.089311069 | 1.114226252  | 6.233408617  |
| O | -0.257149058 | -0.008291531 | 5.575422896  |
| C | -0.734294624 | -1.961143052 | 6.887596729  |
| C | -0.813209006 | 0.337432249  | 7.900936445  |
| H | -4.539834810 | -1.128702855 | 6.056948527  |
| H | -3.274293595 | -2.348844712 | 6.247273153  |
| H | -3.696182110 | -1.286091766 | 7.608229427  |
| H | -3.982002586 | 1.230827118  | 5.612217314  |
| H | -3.358107022 | 1.317407438  | 7.274523052  |
| H | -2.352889432 | 1.854102711  | 5.908778677  |
| N | -0.447669449 | 0.073910411  | 3.127122082  |
| C | 0.910593641  | 0.371550382  | 2.930141963  |
| H | -1.272889966 | -2.381356179 | 7.742277484  |
| H | -0.954171216 | -2.564146121 | 6.002094750  |
| H | 0.338918269  | -2.028820784 | 7.086493692  |
| H | -1.500247310 | 0.069768507  | 8.710872467  |
| H | 0.208588158  | 0.147505601  | 8.243125059  |
| H | -0.907573556 | 1.405355119  | 7.696332943  |
| C | 0.441326058  | 1.583900255  | 0.802743948  |
| C | -1.047112268 | 1.270305798  | 1.058589465  |
| C | 1.344775059  | 1.000539170  | 1.824813212  |
| H | 0.753445418  | 1.261575573  | -0.190724066 |
| H | -1.583113297 | 1.180716569  | 0.107099453  |
| H | -1.530632162 | 2.090541405  | 1.613904972  |

|   |              |              |             |
|---|--------------|--------------|-------------|
| H | -0.919962514 | -0.874197417 | 1.318076353 |
| H | 2.415274753  | 1.134124023  | 1.698258742 |
| H | 1.574653012  | 0.054403240  | 3.728734497 |

**8'<sub>sub</sub>**

|   |              |              |              |
|---|--------------|--------------|--------------|
| H | -1.035796303 | 0.000000000  | -6.434348065 |
| C | -0.267638494 | 0.297595864  | -5.697538564 |
| O | -0.456023479 | -1.009010409 | -0.641810017 |
| C | -0.613379630 | -0.472432145 | 0.695686568  |
| C | -1.953456055 | 0.342263520  | 0.569158668  |
| C | 0.601727399  | 0.425408328  | 0.967999121  |
| C | -0.653458325 | -1.630131211 | 1.687937021  |
| B | -1.117438113 | -0.138757361 | -1.490989433 |
| O | -1.913891423 | 0.777632342  | -0.814494132 |
| C | -3.201385889 | -0.535762996 | 0.728050729  |
| H | 1.513013136  | -0.160515382 | 0.819116611  |
| H | 0.625353227  | 1.272103583  | 0.275575792  |
| H | 0.598937401  | 0.811479962  | 1.992254492  |
| H | 0.317330959  | -2.134093626 | 1.704865104  |
| H | -0.867790809 | -1.266345362 | 2.698679993  |
| H | -1.410509931 | -2.365783733 | 1.411229799  |
| N | -0.988764716 | -0.154652190 | -2.894467237 |
| C | -1.731029892 | 0.785199019  | -3.748451115 |
| C | -0.142271326 | -1.037327730 | -3.579544751 |
| H | -1.980525464 | 1.282511962  | 2.523182058  |
| H | -1.255323654 | 2.286993228  | 1.248881469  |
| H | -3.008983056 | 2.070439826  | 1.312987733  |
| H | -3.348965983 | -0.845587850 | 1.767297352  |
| H | -4.077554804 | 0.034613839  | 0.406840419  |
| H | -3.129189634 | -1.430720356 | 0.103256700  |
| C | -0.786697803 | 1.413385243  | -4.778298664 |
| C | 0.162316801  | -0.902774579 | -4.879278652 |
| H | 0.589107465  | 0.656702228  | -6.280542205 |
| H | 0.067286180  | 1.808446548  | -4.221274602 |
| H | 0.787131864  | -1.657702895 | -5.349349198 |
| H | -2.528897359 | 0.230714809  | -4.258718932 |
| H | -2.207427577 | 1.528952566  | -3.109854041 |
| H | 0.245439334  | -1.853333668 | -2.976986797 |
| C | -2.048318348 | 1.570488627  | 1.468592241  |

**8-TS**

|    |              |              |              |
|----|--------------|--------------|--------------|
| Rh | -3.075060967 | 1.934145117  | 2.174067580  |
| Cl | -3.252005404 | 2.919284356  | 4.370423441  |
| H  | -0.484139320 | -1.736542093 | -0.848073702 |
| C  | -0.814246689 | 4.008824324  | -0.501769137 |
| O  | -0.986472781 | 2.704447569  | 0.109640025  |
| C  | -2.190764898 | 4.214121732  | -1.229434461 |
| C  | 0.401288648  | 3.951812591  | -1.420624881 |
| C  | -0.582076817 | 5.016995526  | 0.632133890  |
| B  | -2.353981129 | 2.530170612  | 0.361954909  |
| O  | -3.087168871 | 3.454352920  | -0.383270229 |
| C  | -2.221430324 | 3.606200802  | -2.635975976 |
| C  | -2.688806262 | 5.657965042  | -1.271973107 |
| H  | -1.647908928 | 4.219316207  | -3.339342491 |
| H  | -1.827586570 | 2.589756061  | -2.649495983 |
| H  | -3.259285942 | 3.562446394  | -2.979082476 |





|   |              |              |              |
|---|--------------|--------------|--------------|
| H | -3.525116762 | -0.434003896 | 6.624538482  |
| H | -7.517654585 | 0.912178751  | 3.826725982  |
| H | -6.578988464 | -0.419246922 | 4.514474195  |
| H | -7.320359916 | 0.791363880  | 5.585826797  |
| H | -6.535301192 | 3.148215670  | 3.524553803  |
| H | -6.574935972 | 3.284825954  | 5.295890043  |
| H | -5.080156321 | 3.632153400  | 4.405385609  |
| H | -5.457731215 | 2.015286040  | 7.367140916  |
| H | -3.696723748 | 1.864124860  | 7.511373041  |
| H | -4.389688667 | 3.179218920  | 6.552753011  |
| C | -3.119800339 | -2.320972800 | 2.223842693  |
| C | -4.456369625 | -1.898401142 | 2.253319083  |
| C | -2.820160881 | -3.644671801 | 1.866799325  |
| C | -5.476018975 | -2.800814431 | 1.952322869  |
| C | -3.845722695 | -4.539887261 | 1.561753287  |
| C | -5.175983291 | -4.119595349 | 1.608141148  |
| H | -4.697868935 | -0.867349999 | 2.481575726  |
| H | -1.787304487 | -3.976837305 | 1.821276761  |
| H | -6.508407477 | -2.462116303 | 1.969381261  |
| H | -3.603844542 | -5.562294578 | 1.283754728  |
| H | -5.974667091 | -4.815919872 | 1.365846552  |
| C | -1.492081371 | -1.521086490 | 4.485654515  |
| C | -0.923753986 | -0.552154896 | 5.323698021  |
| C | -1.790976366 | -2.784744023 | 5.019340742  |
| C | -0.641912376 | -0.844435401 | 6.657886993  |
| C | -1.523359080 | -3.070109285 | 6.358006796  |
| C | -0.944520807 | -2.102323947 | 7.180802850  |
| H | -0.736578275 | 0.440559635  | 4.932376925  |
| H | -2.246137892 | -3.546423421 | 4.395590845  |
| H | -0.204763832 | -0.079017892 | 7.293661172  |
| H | -1.770851342 | -4.049630662 | 6.758142015  |
| H | -0.738712947 | -2.324916479 | 8.224575796  |
| C | -0.306995239 | -1.810034900 | 1.850729919  |
| C | 0.848488396  | -2.220347375 | 2.525222349  |
| C | -0.322015342 | -1.806245488 | 0.444806936  |
| C | 1.977764287  | -2.620030276 | 1.804212241  |
| C | 0.802768341  | -2.213175679 | -0.267804454 |
| C | 1.958373516  | -2.617925551 | 0.409356131  |
| H | 0.870028540  | -2.227166920 | 3.610893781  |
| H | -1.210580684 | -1.459237060 | -0.077688196 |
| H | 2.871266030  | -2.935100428 | 2.337178667  |
| H | 0.783549729  | -2.201018691 | -1.354036635 |
| H | 2.837715702  | -2.928476363 | -0.148523969 |

Ic

|    |              |              |              |
|----|--------------|--------------|--------------|
| Rh | -2.400123126 | 0.629744534  | 2.100829845  |
| Cl | -4.329827590 | 0.029055079  | 3.429187637  |
| H  | -0.379200169 | 2.259625160  | 3.140187510  |
| P  | -1.154676560 | -1.137302987 | 2.939810277  |
| C  | 1.890874470  | 2.208093121  | 0.684518917  |
| C  | 1.011139164  | 1.809096774  | -0.383240266 |
| C  | -0.233567843 | 1.337850092  | -0.020156339 |
| N  | -0.734246023 | 1.455579596  | 1.229040761  |
| C  | -0.098493494 | 2.458666502  | 2.097908111  |
| C  | 1.401247560  | 2.414449397  | 1.932226921  |
| H  | 2.964152719  | 2.246009278  | 0.501195553  |
| H  | 1.362969371  | 1.691912929  | -1.401724686 |

|   |              |              |              |
|---|--------------|--------------|--------------|
| H | -0.847940739 | 0.790869758  | -0.730070699 |
| H | -0.506913500 | 3.464394604  | 1.851594185  |
| H | 2.041761236  | 2.574997201  | 2.794474622  |
| C | -4.509884450 | 4.961269054  | 0.850411179  |
| C | -4.800891257 | 4.349512051  | 2.067840207  |
| C | -4.239417451 | 3.107776643  | 2.351070359  |
| N | -3.412982136 | 2.479149786  | 1.493367500  |
| C | -3.133292630 | 3.068695957  | 0.314957592  |
| C | -3.664844198 | 4.303217857  | -0.041407787 |
| H | -4.933035125 | 5.930356114  | 0.601084679  |
| H | -5.455354467 | 4.818096098  | 2.795469692  |
| H | -4.456836229 | 2.576470611  | 3.270445526  |
| H | -2.469375343 | 2.529257815  | -0.342815542 |
| H | -3.408807336 | 4.736340120  | -1.002769890 |
| C | -3.738014705 | -0.806657918 | -1.592754831 |
| O | -3.262805373 | 0.230689429  | -0.684366038 |
| C | -2.998366043 | -2.081964590 | -1.048349508 |
| C | -3.368759592 | -0.404498115 | -3.015867223 |
| C | -5.259185391 | -0.871847675 | -1.422009112 |
| B | -2.890620569 | -0.390736747 | 0.487586628  |
| O | -2.861091481 | -1.762769931 | 0.368124588  |
| C | -1.580768680 | -2.252321594 | -1.606006648 |
| C | -3.779504878 | -3.385428754 | -1.169738063 |
| H | -1.600508674 | -2.540880419 | -2.661545706 |
| H | -0.997685916 | -1.333502394 | -1.503218663 |
| H | -1.064671311 | -3.029673983 | -1.038582211 |
| H | -3.917312909 | 0.499121694  | -3.296951745 |
| H | -2.301275421 | -0.196667449 | -3.108142605 |
| H | -3.633735107 | -1.198738187 | -3.721885729 |
| H | -5.679490283 | 0.116874325  | -1.625084690 |
| H | -5.711591862 | -1.591805265 | -2.110752514 |
| H | -5.523567586 | -1.146649623 | -0.397030297 |
| H | -3.975691677 | -3.621553510 | -2.221132457 |
| H | -3.193659416 | -4.202335747 | -0.738872556 |
| H | -4.731096457 | -3.333058180 | -0.638144934 |
| C | -2.025967966 | -2.529319266 | 3.763645291  |
| C | -1.479758428 | -3.114252418 | 4.916068274  |
| C | -3.208215697 | -3.053547675 | 3.221617835  |
| C | -2.105868330 | -4.206740890 | 5.516770178  |
| C | -3.825779979 | -4.149389065 | 3.823966372  |
| C | -3.280847135 | -4.727557810 | 4.972087435  |
| H | -0.566846655 | -2.716701212 | 5.348817339  |
| H | -3.639393275 | -2.603646144 | 2.338009676  |
| H | -1.674981654 | -4.647515750 | 6.411604345  |
| H | -4.744961864 | -4.543226058 | 3.399076540  |
| H | -3.771034209 | -5.575662040 | 5.442354854  |
| C | 0.072510344  | -1.971966488 | 1.861154695  |
| C | 1.097341935  | -1.229568764 | 1.253284834  |
| C | -0.018353970 | -3.349100062 | 1.604008651  |
| C | 2.010369435  | -1.856331347 | 0.404694579  |
| C | 0.899602064  | -3.969151678 | 0.755748548  |
| C | 1.914685374  | -3.225146830 | 0.149218365  |
| H | 1.192162159  | -0.168269846 | 1.445528170  |
| H | -0.805730406 | -3.937817403 | 2.061158733  |
| H | 2.789373554  | -1.260145843 | -0.061700411 |
| H | 0.817589683  | -5.036465639 | 0.567570952  |
| H | 2.624454883  | -3.709989890 | -0.515632379 |
| C | -0.212626988 | -0.354450698 | 4.312017686  |



|   |              |              |             |
|---|--------------|--------------|-------------|
| C | -0.971438599 | 0.337932618  | 5.274376777 |
| C | 1.182789266  | -0.375922162 | 4.426475210 |
| C | -0.337465923 | 1.004186698  | 6.322057231 |
| C | 1.810948583  | 0.295682208  | 5.477913583 |
| C | 1.056524331  | 0.991768459  | 6.422829699 |
| H | -2.057130693 | 0.345595655  | 5.201546462 |
| H | 1.783707129  | -0.911722834 | 3.700582480 |
| H | -0.934076531 | 1.535147091  | 7.058585921 |
| H | 2.894703849  | 0.274527251  | 5.553048248 |
| H | 1.550355615  | 1.516931543  | 7.235554856 |

**Id**

|    |              |              |              |
|----|--------------|--------------|--------------|
| Rh | -2.686958366 | 2.123163939  | 2.344503785  |
| Cl | -1.186601432 | 1.237153668  | 4.025187828  |
| H  | 0.754481958  | 5.144828524  | 3.241524329  |
| P  | -2.279175715 | 0.248592471  | 1.041823414  |
| C  | -2.081959319 | 4.315967859  | 4.768276918  |
| C  | -2.921201860 | 4.161541665  | 3.578152941  |
| C  | -2.349532352 | 4.450733803  | 2.345222916  |
| N  | -0.990960851 | 4.653892199  | 2.186770451  |
| C  | -0.064253178 | 4.422159797  | 3.324803204  |
| C  | -0.763161287 | 4.516568429  | 4.653211148  |
| H  | -2.560288587 | 4.296477715  | 5.742626883  |
| H  | -3.998781673 | 4.218003719  | 3.666265464  |
| H  | -2.947235237 | 4.735481905  | 1.488719358  |
| H  | 0.375087481  | 3.417653063  | 3.230321199  |
| H  | -0.133374548 | 4.661378108  | 5.525881791  |
| C  | -0.312728480 | 4.851418952  | -1.392133858 |
| O  | -1.221500115 | 4.948401754  | -0.257643555 |
| C  | 1.073864281  | 5.245300727  | -0.749132925 |
| C  | -0.804722767 | 5.795377634  | -2.484568504 |
| C  | -0.351544607 | 3.400113977  | -1.878733670 |
| B  | -0.448218153 | 4.812052024  | 0.872359952  |
| O  | 0.903490538  | 4.840787425  | 0.638409472  |
| C  | 1.324998838  | 6.757924410  | -0.739982974 |
| C  | 2.277706248  | 4.504064181  | -1.321544452 |
| H  | 1.524987108  | 7.139269534  | -1.745948891 |
| H  | 0.466233033  | 7.295557255  | -0.327207092 |
| H  | 2.192779467  | 6.969024960  | -0.109096093 |
| H  | -1.772857175 | 5.449443243  | -2.858298502 |
| H  | -0.931075303 | 6.812972598  | -2.111147153 |
| H  | -0.101559761 | 5.813087345  | -3.323987241 |
| H  | -1.375562181 | 3.141586402  | -2.159457948 |
| H  | 0.288249654  | 3.252819879  | -2.753644196 |
| H  | -0.031678241 | 2.711703807  | -1.094759607 |
| H  | 2.385101739  | 4.712184624  | -2.391496981 |
| H  | 3.188413957  | 4.838146036  | -0.815941336 |
| H  | 2.183866871  | 3.426359494  | -1.178478264 |
| C  | -3.364883841 | 0.094683734  | -0.437793853 |
| C  | -4.012967929 | -1.096047660 | -0.780982516 |
| C  | -3.529659216 | 1.223444307  | -1.255408794 |
| C  | -4.810358741 | -1.157854329 | -1.927118941 |
| C  | -4.318549615 | 1.158240007  | -2.400984661 |
| C  | -4.963048046 | -0.034818164 | -2.740431105 |
| H  | -3.900818128 | -1.974268902 | -0.153626101 |
| H  | -3.045203045 | 2.156839146  | -0.983976654 |
| H  | -5.313501731 | -2.086909793 | -2.181809156 |

|   |              |              |              |
|---|--------------|--------------|--------------|
| H | -4.437287664 | 2.040005518  | -3.025263177 |
| H | -5.584418537 | -0.085439881 | -3.630531407 |
| C | -2.375907792 | -1.385796408 | 1.857636564  |
| C | -1.575148183 | -2.466897588 | 1.465006114  |
| C | -3.309930790 | -1.552002947 | 2.889810213  |
| C | -1.716632146 | -3.705275755 | 2.092121169  |
| C | -3.450005197 | -2.792302282 | 3.508910198  |
| C | -2.654839942 | -3.869571742 | 3.112409523  |
| H | -0.839734246 | -2.343485619 | 0.675713560  |
| H | -3.920723011 | -0.710330687 | 3.195248172  |
| H | -1.090360842 | -4.538920413 | 1.785979558  |
| H | -4.173695215 | -2.914919813 | 4.310046576  |
| H | -2.761209270 | -4.833894398 | 3.602206032  |
| C | -0.604656666 | 0.303802945  | 0.265734012  |
| C | 0.478881114  | 0.831804720  | 0.985593196  |
| C | -0.392001788 | -0.162445590 | -1.042709751 |
| C | 1.744642425  | 0.899036180  | 0.401689101  |
| C | 0.876670087  | -0.097116618 | -1.619257291 |
| C | 1.947572173  | 0.437824800  | -0.900576702 |
| H | 0.327830138  | 1.177386962  | 2.003138901  |
| H | -1.218317769 | -0.566843331 | -1.618090451 |
| H | 2.570718091  | 1.320692716  | 0.967313970  |
| H | 1.024921256  | -0.458551712 | -2.633390328 |
| H | 2.933582360  | 0.496289644  | -1.353907210 |
| C | -6.728212979 | 1.046213026  | 1.716281764  |
| O | -5.297717337 | 0.802471821  | 1.786201745  |
| B | -4.682485211 | 2.000505410  | 2.114721219  |
| O | -5.610466713 | 2.962107756  | 2.490749222  |
| C | -6.884173384 | 2.282982050  | 2.671000191  |
| H | -3.651533123 | 2.620449234  | 1.157913208  |
| C | -6.974975345 | 1.887244182  | 4.149628392  |
| H | -7.936655374 | 1.420881360  | 4.384135897  |
| H | -6.172361858 | 1.193961068  | 4.416714687  |
| H | -6.865035603 | 2.784986424  | 4.764174698  |
| C | -7.456414218 | -0.217591882 | 2.160280535  |
| H | -7.265426277 | -1.019247470 | 1.440824080  |
| H | -7.112260777 | -0.554077270 | 3.139911149  |
| H | -8.537438040 | -0.046407950 | 2.205941032  |
| C | -7.053787033 | 1.367911159  | 0.252706780  |
| H | -6.698358961 | 0.549394977  | -0.378208979 |
| H | -8.130387612 | 1.492721500  | 0.098290298  |
| H | -6.544568730 | 2.280726759  | -0.068380006 |
| C | -8.005721393 | 3.247604149  | 2.302537550  |
| H | -8.976666819 | 2.741873191  | 2.340323249  |
| H | -8.025783466 | 4.078820803  | 3.013414469  |
| H | -7.864052033 | 3.660455803  | 1.302287300  |

**Id-TS**

|    |              |              |             |
|----|--------------|--------------|-------------|
| Rh | -2.374572244 | 1.035998371  | 2.462173394 |
| Cl | -4.801509937 | 0.707509608  | 2.248263060 |
| H  | -0.811545610 | 1.244745669  | 2.706824950 |
| P  | -2.044113700 | -1.204068508 | 2.317949011 |
| C  | -2.985671524 | 5.805240789  | 3.772808262 |
| C  | -4.028689812 | 5.100365793  | 3.175293839 |
| C  | -3.826752751 | 3.774908932  | 2.798320397 |
| N  | -2.650153629 | 3.142814705  | 2.983327067 |
| C  | -1.638944223 | 3.829158307  | 3.558116694 |



|   |              |              |              |
|---|--------------|--------------|--------------|
| H | -6.839992683 | 4.848559766  | 0.255074536  |
| H | -6.030863169 | 3.340036294  | 0.732027874  |
| H | -5.754123420 | 6.561592247  | 2.009548594  |
| H | -4.418651597 | 6.011517977  | 3.041864358  |
| H | -4.743218460 | 5.183944660  | 1.520247689  |
| C | 0.291616884  | 1.339055149  | 2.730505477  |
| C | 1.178695311  | 2.338020435  | 3.168159062  |
| C | 0.797001515  | 0.089957219  | 2.344313511  |
| C | 2.549174297  | 2.091296962  | 3.212045523  |
| C | 2.172685381  | -0.149175416 | 2.388695241  |
| C | 3.049067522  | 0.846386629  | 2.819849341  |
| H | 0.797450981  | 3.307335075  | 3.475514734  |
| H | 0.111620657  | -0.699209446 | 2.049070732  |
| H | 3.226805980  | 2.869286060  | 3.554101662  |
| H | 2.554471277  | -1.123321154 | 2.095591164  |
| H | 4.118215601  | 0.653994783  | 2.858237517  |
| C | -1.656500300 | 2.655014575  | 1.057410193  |
| C | -0.583229066 | 2.899965712  | 0.190493997  |
| C | -2.929231203 | 3.137665304  | 0.703629816  |
| C | -0.778516530 | 3.609548439  | -0.998164124 |
| C | -3.120467088 | 3.851235121  | -0.476624490 |
| C | -2.043949294 | 4.088388420  | -1.336940746 |
| H | 0.408393210  | 2.537114803  | 0.441421843  |
| H | -3.769105856 | 2.949431742  | 1.365271193  |
| H | 0.065743866  | 3.788186997  | -1.659149426 |
| H | -4.114060585 | 4.209741357  | -0.733537522 |
| H | -2.192644660 | 4.637677576  | -2.262518520 |
| C | -1.755327695 | 2.917715911  | 3.929263714  |
| C | -1.974874687 | 4.281486026  | 3.700183941  |
| C | -1.740849409 | 2.447973920  | 5.253801283  |
| C | -2.184027716 | 5.154293794  | 4.771026703  |
| C | -1.944790322 | 3.320402630  | 6.321048575  |
| C | -2.173186094 | 4.678660598  | 6.081863597  |
| H | -1.986593496 | 4.667792214  | 2.686696860  |
| H | -1.576942614 | 1.388899139  | 5.438975351  |
| H | -2.348119994 | 6.211626535  | 4.577385301  |
| H | -1.929275657 | 2.940525491  | 7.339117418  |
| H | -2.336910952 | 5.359484076  | 6.912781864  |

3'-TS

|    |              |              |              |
|----|--------------|--------------|--------------|
| Rh | -3.246641237 | -0.090061596 | 2.811329703  |
| Cl | -2.136027206 | -2.217009883 | 2.265767277  |
| H  | -4.160105131 | 1.304435319  | 2.761392079  |
| P  | -1.775171136 | 0.402522649  | 4.613556585  |
| C  | -0.269250235 | 2.409430501  | -0.478414592 |
| C  | -0.935228656 | 3.092329518  | 0.538619284  |
| C  | -1.773573459 | 2.374292237  | 1.384415992  |
| N  | -1.970514553 | 1.049082160  | 1.266735298  |
| C  | -1.326599580 | 0.392129657  | 0.286738874  |
| C  | -0.472412738 | 1.036670624  | -0.605865597 |
| H  | 0.399896918  | 2.936729279  | -1.152595618 |
| H  | -0.798011849 | 4.158008246  | 0.690403520  |
| H  | -2.292551358 | 2.858763057  | 2.205681023  |
| H  | -1.495919300 | -0.680049400 | 0.258782683  |
| H  | 0.028403379  | 0.462221298  | -1.378777377 |
| C  | -5.398460231 | 0.754152788  | 2.184462809  |
| C  | -5.135891950 | -0.670219245 | 2.176191799  |

|   |              |              |              |
|---|--------------|--------------|--------------|
| C | -4.923163133 | -1.169267723 | 3.525896844  |
| N | -5.701357299 | -0.606926933 | 4.593838852  |
| C | -6.388504246 | 0.574353525  | 4.392412786  |
| C | -6.280805626 | 1.273335461  | 3.241433882  |
| H | -5.435038864 | 1.257321260  | 1.219313287  |
| H | -5.176706738 | -1.281714394 | 1.282926708  |
| H | -4.710727646 | -2.221520392 | 3.674174062  |
| H | -6.981345460 | 0.912683441  | 5.233717231  |
| H | -6.778874598 | 2.227526216  | 3.117850724  |
| C | -5.715507984 | -1.242470461 | 8.172114851  |
| O | -6.236330932 | -0.556662975 | 6.995306539  |
| C | -5.375801795 | -2.663208856 | 7.593059456  |
| C | -6.784929284 | -1.225035150 | 9.257214779  |
| C | -4.470413545 | -0.469433281 | 8.619892097  |
| B | -5.647882694 | -1.171111258 | 5.916745052  |
| O | -5.009218408 | -2.346388130 | 6.213779231  |
| C | -6.595603339 | -3.588568737 | 7.520560096  |
| C | -4.206981784 | -3.366060738 | 8.271057078  |
| H | -6.892616860 | -3.936954284 | 8.514367377  |
| H | -7.447670961 | -3.080322506 | 7.059603058  |
| H | -6.344079322 | -4.458170683 | 6.907501805  |
| H | -6.951247630 | -0.196933210 | 9.591476342  |
| H | -7.734017997 | -1.621281196 | 8.892001220  |
| H | -6.464553231 | -1.817093074 | 10.120905685 |
| H | -4.735075758 | 0.580136556  | 8.768014448  |
| H | -4.068089256 | -0.866106999 | 9.557063241  |
| H | -3.685396854 | -0.506731651 | 7.860519959  |
| H | -4.423802643 | -3.520598787 | 9.333577571  |
| H | -4.046608520 | -4.345333144 | 7.810682077  |
| H | -3.283488054 | -2.795489134 | 8.174883005  |
| C | -1.037868851 | -1.026452821 | 5.517080192  |
| C | 0.241367108  | -0.974889023 | 6.095327749  |
| C | -1.784732888 | -2.206692245 | 5.627702853  |
| C | 0.752959234  | -2.073753187 | 6.786102599  |
| C | -1.267438882 | -3.305297325 | 6.315567655  |
| C | -0.001515484 | -3.243405018 | 6.899516525  |
| H | 0.847883817  | -0.079695295 | 5.992980139  |
| H | -2.759466736 | -2.274062527 | 5.163829732  |
| H | 1.744687031  | -2.017701811 | 7.227412934  |
| H | -1.855345190 | -4.216069763 | 6.380564899  |
| H | 0.400550270  | -4.103687517 | 7.427837339  |
| C | -2.445175701 | 1.449743491  | 5.981654319  |
| C | -1.779583593 | 1.594365228  | 7.210912809  |
| C | -3.641266625 | 2.150399930  | 5.778942901  |
| C | -2.290656750 | 2.431832169  | 8.200794726  |
| C | -4.156150243 | 2.985892398  | 6.772481430  |
| C | -3.479734998 | 3.133163038  | 7.982842029  |
| H | -0.860983545 | 1.047123856  | 7.396927327  |
| H | -4.176170494 | 2.031584483  | 4.842301332  |
| H | -1.762523678 | 2.535179489  | 9.145036467  |
| H | -5.088925175 | 3.515738345  | 6.598923117  |
| H | -3.878220731 | 3.783654228  | 8.756948570  |
| C | -0.269776345 | 1.326681068  | 4.095723501  |
| C | 0.566458927  | 0.684557143  | 3.164274439  |
| C | 0.021837182  | 2.640846524  | 4.480704739  |
| C | 1.675244774  | 1.343959692  | 2.643064471  |
| C | 1.133253709  | 3.301554247  | 3.949251855  |
| C | 1.961412598  | 2.656668321  | 3.032379494  |

|   |              |              |             |
|---|--------------|--------------|-------------|
| H | 0.326101882  | -0.325976060 | 2.841476176 |
| H | -0.613430989 | 3.152496182  | 5.197366426 |
| H | 2.311896267  | 0.838134276  | 1.922346748 |
| H | 1.350506816  | 4.321187249  | 4.257558001 |
| H | 2.824962734  | 3.172081882  | 2.620358004 |

---

**5-Py**

---

|    |              |              |              |
|----|--------------|--------------|--------------|
| Rh | 0.290745083  | 1.182905149  | 0.057962801  |
| Cl | 0.729268002  | 1.734879762  | -2.279539245 |
| P  | 1.970961114  | -0.364067248 | -0.091474415 |
| C  | 2.052817049  | -1.599562462 | 1.280702694  |
| C  | 1.374700433  | -2.825809171 | 1.193286201  |
| C  | 2.679310615  | -1.262070842 | 2.492014966  |
| C  | 1.334849353  | -3.691617210 | 2.287071175  |
| C  | 2.641666452  | -2.131161601 | 3.581585919  |
| C  | 1.967184939  | -3.349161624 | 3.482733081  |
| H  | 0.876006291  | -3.106265801 | 0.271651450  |
| H  | 3.216807667  | -0.321583508 | 2.577602276  |
| H  | 0.808842218  | -4.638834910 | 2.201272081  |
| H  | 3.139352050  | -1.855082757 | 4.507482035  |
| H  | 1.935908729  | -4.026302463 | 4.332028527  |
| C  | 3.683563891  | 0.302101739  | -0.159203705 |
| C  | 4.800920382  | -0.463762191 | 0.214481722  |
| C  | 3.877192560  | 1.612634959  | -0.620295921 |
| C  | 6.084911326  | 0.074488291  | 0.136032765  |
| C  | 5.164604776  | 2.145140514  | -0.699566959 |
| C  | 6.268816151  | 1.381604294  | -0.319378518 |
| H  | 4.668467177  | -1.479158721 | 0.575371837  |
| H  | 3.020496983  | 2.199129316  | -0.935765220 |
| H  | 6.940525981  | -0.527090119 | 0.431526800  |
| H  | 5.301832008  | 3.160783420  | -1.060770606 |
| H  | 7.269589388  | 1.801662362  | -0.378131872 |
| C  | 1.808520510  | -1.440476526 | -1.573239167 |
| C  | 0.516720429  | -1.818157224 | -1.973270819 |
| C  | 2.914717359  | -1.914558966 | -2.287456371 |
| C  | 0.344891138  | -2.674435504 | -3.059619403 |
| C  | 2.735580462  | -2.762053634 | -3.381546049 |
| C  | 1.452060615  | -3.146346168 | -3.767866808 |
| H  | -0.348113006 | -1.441177847 | -1.434482539 |
| H  | 3.918187487  | -1.615496186 | -2.002927523 |
| H  | -0.657383457 | -2.962473898 | -3.362992985 |
| H  | 3.601651051  | -3.116537487 | -3.934302391 |
| H  | 1.313758303  | -3.804574596 | -4.621673761 |
| C  | -3.423229948 | -2.589038985 | -0.303023662 |
| O  | -2.339503904 | -1.704997153 | 0.083356213  |
| C  | -4.656763693 | -1.610206156 | -0.309905047 |
| C  | -3.522200597 | -3.671252971 | 0.780260122  |
| C  | -3.084335785 | -3.214233830 | -1.651493290 |
| B  | -2.920479628 | -0.684438591 | 0.817390065  |
| O  | -4.296752805 | -0.652583885 | 0.723153418  |
| N  | -2.168347049 | 0.228840545  | 1.591571690  |
| C  | -5.989229206 | -2.251072259 | 0.062003958  |
| C  | -4.783423970 | -0.825534632 | -1.621840269 |
| H  | -6.244164048 | -3.048728490 | -0.643960184 |
| H  | -5.960925359 | -2.669757733 | 1.069583161  |
| H  | -6.783199428 | -1.499072062 | 0.029994869  |
| H  | -2.548062712 | -4.158941406 | 0.878197679  |

|   |              |              |              |
|---|--------------|--------------|--------------|
| H | -3.780489800 | -3.232632468 | 1.748791718  |
| H | -4.269648880 | -4.430353281 | 0.529832190  |
| H | -3.909457490 | -3.840676791 | -2.006836421 |
| H | -2.873494958 | -2.451322800 | -2.403188143 |
| H | -2.193955205 | -3.841679625 | -1.550475505 |
| H | -3.820133698 | -0.399951841 | -1.917673191 |
| H | -5.147007693 | -1.457025312 | -2.437989377 |
| H | -5.490629563 | -0.004353200 | -1.474099523 |
| C | -0.566622647 | 2.148926150  | 2.946316677  |
| C | 0.073714497  | 1.041165507  | 2.227186007  |
| C | -1.899290230 | 2.280536259  | 2.981208499  |
| H | 0.068207915  | 2.854313684  | 3.478363580  |
| C | -0.762872420 | 0.088637956  | 1.602396613  |
| H | 1.021048572  | 0.698817436  | 2.629407596  |
| H | -0.452823096 | -0.945223039 | 1.519448248  |
| H | -3.610252977 | 0.988282559  | 2.928172383  |
| C | -2.839927149 | 1.369980074  | 2.241464153  |
| H | -3.384683006 | 1.952352208  | 1.483205943  |
| H | -2.368835076 | 3.090175178  | 3.535171344  |
| N | -1.271006666 | 2.651222718  | -0.165063027 |
| C | -2.290762424 | 2.335713555  | -0.983635836 |
| C | -1.181834086 | 3.907339276  | 0.299111317  |
| C | -3.271646625 | 3.253040435  | -1.342165193 |
| C | -2.111535801 | 4.891054734  | -0.027586274 |
| C | -3.180866940 | 4.557507872  | -0.856573348 |
| H | -2.295370222 | 1.318460730  | -1.355257713 |
| H | -0.341925722 | 4.112354598  | 0.951414822  |
| H | -4.082461239 | 2.945362043  | -1.994152383 |
| H | -1.993078594 | 5.895475363  | 0.365901358  |
| H | -3.926116974 | 5.301153426  | -1.124305181 |

---

**5'-Py**

---

|    |              |              |              |
|----|--------------|--------------|--------------|
| Rh | 0.305709555  | -1.154171969 | -0.074979714 |
| Cl | 0.894209331  | -1.865800678 | 2.180344198  |
| H  | -0.036392945 | -3.148987533 | -2.629128566 |
| P  | 1.956722533  | 0.423875690  | 0.086919834  |
| C  | 1.974217702  | 1.702896114  | -1.246176844 |
| C  | 2.563010414  | 1.410040985  | -2.487844711 |
| C  | 1.276986518  | 2.911923601  | -1.103136592 |
| C  | 2.462969519  | 2.303482236  | -3.553281043 |
| C  | 1.175652898  | 3.803738145  | -2.171752938 |
| C  | 1.765958329  | 3.503005610  | -3.399465856 |
| H  | 3.118841722  | 0.485601734  | -2.617017717 |
| H  | 0.806791118  | 3.157097569  | -0.156334954 |
| H  | 2.929072350  | 2.060370544  | -4.504324424 |
| H  | 0.633603860  | 4.736661840  | -2.041451037 |
| H  | 1.684918225  | 4.198076630  | -4.230615508 |
| C  | 3.692035218  | -0.188019283 | 0.080504728  |
| C  | 3.944449340  | -1.526080074 | 0.417016445  |
| C  | 4.772124287  | 0.649837456  | -0.246415853 |
| C  | 5.252000289  | -2.013838915 | 0.420353089  |
| C  | 6.076251495  | 0.156788397  | -0.243094914 |
| C  | 6.318273041  | -1.177861795 | 0.088280191  |
| H  | 3.117743953  | -2.170668901 | 0.695521031  |
| H  | 4.593675052  | 1.686607361  | -0.514873195 |
| H  | 5.434463054  | -3.051921562 | 0.684473378  |
| H  | 6.901844413  | 0.814396449  | -0.501755370 |

|   |              |              |              |
|---|--------------|--------------|--------------|
| H | 7.334539661  | -1.563065150 | 0.087201794  |
| C | 1.786506721  | 1.432727461  | 1.613813990  |
| C | 2.886060698  | 1.900868662  | 2.341731775  |
| C | 0.488093261  | 1.749086321  | 2.046249222  |
| C | 2.693366864  | 2.681162658  | 3.482581824  |
| C | 0.302540207  | 2.536603125  | 3.181286392  |
| C | 1.403247793  | 3.002307666  | 3.903351772  |
| H | 3.894528713  | 1.647594579  | 2.031741369  |
| H | -0.370825110 | 1.374368332  | 1.496003088  |
| H | 3.554357183  | 3.031282161  | 4.045635589  |
| H | -0.704554578 | 2.772793631  | 3.512633089  |
| H | 1.255054260  | 3.605934750  | 4.794871369  |
| C | -4.717044983 | 1.473446117  | 0.335169556  |
| O | -4.329722260 | 0.595596401  | -0.757851020 |
| C | -3.472569290 | 2.434000122  | 0.449233111  |
| C | -4.908116221 | 0.590861598  | 1.574599481  |
| C | -6.028481344 | 2.159149574  | -0.032196952 |
| B | -2.952770292 | 0.620883264  | -0.807076765 |
| O | -2.386022951 | 1.574318171  | 0.016324268  |
| N | -2.165170778 | -0.247194790 | -1.608565002 |
| C | -3.164131267 | 2.933685112  | 1.856721850  |
| C | -3.526729094 | 3.607995316  | -0.536258375 |
| H | -2.962119392 | 2.106891901  | 2.540292727  |
| H | -2.276787785 | 3.572488516  | 1.830720243  |
| H | -3.999873437 | 3.521194279  | 2.250990581  |
| H | -3.967779286 | 0.121900772  | 1.876797743  |
| H | -5.292314559 | 1.165620592  | 2.422492613  |
| H | -5.625426787 | -0.199558920 | 1.336501533  |
| H | -6.830426802 | 1.417163216  | -0.085319719 |
| H | -6.299629276 | 2.901864052  | 0.725564357  |
| H | -5.961497810 | 2.654597732  | -1.001997330 |
| H | -2.545622023 | 4.090658274  | -0.559880086 |
| H | -3.757514174 | 3.260006622  | -1.547427436 |
| H | -4.274858169 | 4.350222079  | -0.242076246 |
| C | -0.459114965 | -2.201685829 | -2.995044678 |
| C | -1.964504201 | -2.242940066 | -2.955356411 |
| C | 0.102966155  | -1.014120912 | -2.227996330 |
| H | -0.120381521 | -2.134382708 | -4.042023640 |
| C | -2.706800743 | -1.332855384 | -2.314604399 |
| H | -2.472173246 | -3.042763725 | -3.486717094 |
| H | -3.790130081 | -1.380216320 | -2.289068189 |
| C | -0.751992444 | -0.074522087 | -1.613681075 |
| H | -0.467651774 | 0.967184829  | -1.535670203 |
| H | 1.038742087  | -0.630836001 | -2.621166234 |
| N | -1.216317525 | -2.649131443 | 0.137153930  |
| C | -2.346802217 | -2.308356652 | 0.777858728  |
| C | -0.993753259 | -3.945891405 | -0.128487360 |
| C | -3.312906821 | -3.239907178 | 1.138078590  |
| C | -1.908045939 | -4.941760147 | 0.199840695  |
| C | -3.093968573 | -4.583632553 | 0.838747257  |
| H | -2.457136883 | -1.256183657 | 1.006163728  |
| H | -0.051658512 | -4.177763129 | -0.611772879 |
| H | -4.212498193 | -2.910771999 | 1.647721466  |
| H | -1.685502785 | -5.976524192 | -0.039166179 |
| H | -3.827575641 | -5.338087887 | 1.107860125  |

## VII-9. Vibrational frequencies of DFT-optimized structures

### Pyridine

|         |         |         |         |         |         |
|---------|---------|---------|---------|---------|---------|
| 385.71  | 420.35  | 613.29  | 668.66  | 719.16  | 763.89  |
| 898.89  | 958.22  | 998.52  | 1011.25 | 1014.40 | 1050.11 |
| 1085.56 | 1099.40 | 1182.63 | 1251.53 | 1309.78 | 1389.12 |
| 1482.02 | 1524.02 | 1636.71 | 1642.58 | 3161.92 | 3164.33 |
| 3187.18 | 3203.80 | 3212.35 |         |         |         |

### HBpin

|         |         |         |         |         |         |
|---------|---------|---------|---------|---------|---------|
| 95.62   | 230.49  | 246.02  | 284.56  | 291.62  | 295.94  |
| 323.54  | 334.19  | 361.57  | 372.65  | 398.18  | 449.28  |
| 512.82  | 522.62  | 583.39  | 665.82  | 748.83  | 806.22  |
| 868.45  | 904.88  | 938.01  | 947.34  | 965.47  | 978.76  |
| 1023.00 | 1031.46 | 1065.06 | 1144.78 | 1183.61 | 1192.05 |
| 1207.02 | 1244.76 | 1273.03 | 1302.94 | 1383.08 | 1415.82 |
| 1418.92 | 1428.65 | 1438.61 | 1485.02 | 1494.30 | 1497.16 |
| 1502.08 | 1518.15 | 1520.83 | 1523.16 | 1541.91 | 2714.60 |
| 3051.27 | 3053.90 | 3055.94 | 3060.33 | 3124.17 | 3124.92 |
| 3132.32 | 3133.29 | 3137.25 | 3137.52 | 3154.21 | 3154.33 |

### A

|         |         |         |         |         |         |
|---------|---------|---------|---------|---------|---------|
| 43.72   | 58.62   | 102.17  | 106.90  | 122.29  | 207.15  |
| 222.45  | 236.34  | 265.32  | 274.08  | 308.25  | 325.60  |
| 332.59  | 337.89  | 363.10  | 378.35  | 385.63  | 413.23  |
| 455.59  | 524.45  | 530.46  | 541.79  | 585.77  | 597.53  |
| 630.10  | 662.26  | 677.08  | 722.16  | 768.89  | 812.28  |
| 861.29  | 877.00  | 939.19  | 942.73  | 944.51  | 947.83  |
| 952.50  | 974.88  | 975.57  | 984.70  | 1004.74 | 1022.08 |
| 1030.38 | 1045.52 | 1107.65 | 1146.02 | 1160.04 | 1188.68 |
| 1192.85 | 1206.01 | 1250.37 | 1270.93 | 1279.07 | 1294.87 |
| 1304.69 | 1367.14 | 1371.42 | 1415.53 | 1417.71 | 1422.37 |
| 1428.16 | 1437.57 | 1461.23 | 1486.31 | 1493.33 | 1498.41 |
| 1501.73 | 1507.99 | 1516.96 | 1518.55 | 1524.23 | 1525.49 |
| 1541.48 | 1644.69 | 1716.34 | 2931.68 | 3050.33 | 3052.21 |
| 3055.17 | 3059.08 | 3106.80 | 3123.11 | 3123.50 | 3130.50 |
| 3131.79 | 3135.14 | 3135.67 | 3152.84 | 3153.91 | 3173.13 |
| 3198.68 | 3204.62 | 3226.26 |         |         |         |

### B

|         |         |         |         |         |         |
|---------|---------|---------|---------|---------|---------|
| 50.92   | 58.64   | 98.48   | 108.01  | 115.29  | 198.30  |
| 222.02  | 237.34  | 262.01  | 273.54  | 306.19  | 324.03  |
| 329.18  | 340.09  | 380.66  | 382.53  | 414.58  | 427.36  |
| 447.84  | 515.34  | 524.03  | 531.32  | 585.65  | 601.53  |
| 638.64  | 656.51  | 674.53  | 751.74  | 759.27  | 813.62  |
| 861.88  | 877.62  | 896.98  | 940.38  | 946.74  | 971.29  |
| 972.11  | 973.89  | 980.53  | 987.20  | 1007.14 | 1009.87 |
| 1021.52 | 1030.86 | 1106.12 | 1143.88 | 1152.12 | 1188.63 |
| 1191.96 | 1216.81 | 1249.22 | 1256.45 | 1270.43 | 1299.62 |
| 1325.26 | 1367.73 | 1379.12 | 1415.43 | 1416.93 | 1419.74 |

1428.18 1437.73 1450.58 1485.71 1493.54 1497.86  
1501.89 1503.43 1508.30 1518.50 1522.74 1523.88  
1541.60 1710.59 1775.42 2963.45 2966.21 3050.80  
3052.81 3055.77 3059.74 3124.15 3124.77 3131.28  
3131.82 3135.63 3136.39 3152.00 3152.56 3188.39  
3189.17 3226.24 3228.22

**G**

12.18 19.60 36.66 52.23 81.34 87.95  
104.17 111.06 120.18 147.27 171.63 224.92  
228.04 234.41 238.57 258.96 270.46 285.36  
287.69 298.52 305.32 320.41 324.64 326.09  
334.92 336.73 340.51 354.94 374.80 377.28  
384.19 393.50 403.28 435.56 443.83 454.17  
513.92 523.42 525.27 534.70 541.22 555.08  
586.30 587.78 604.33 660.06 673.49 674.36  
718.20 756.90 779.87 807.72 839.65 859.21  
864.67 870.77 880.74 926.13 939.41 939.94  
945.99 947.92 960.02 969.04 973.27 976.81  
985.71 990.94 1021.71 1022.43 1024.15 1030.25  
1034.25 1042.77 1082.21 1114.31 1143.16 1146.57  
1172.12 1180.39 1191.29 1191.59 1192.41 1195.57  
1234.73 1247.59 1249.94 1269.76 1272.19 1289.20  
1302.06 1302.64 1307.07 1310.80 1349.62 1363.37  
1368.52 1390.09 1403.22 1414.61 1415.53 1416.93  
1418.19 1427.25 1428.12 1436.81 1438.00 1442.73  
1485.91 1486.22 1493.57 1493.78 1497.37 1498.14  
1498.52 1501.74 1501.75 1513.50 1518.12 1518.49  
1519.15 1520.35 1523.64 1524.17 1533.18 1541.39  
1541.98 1725.84 2946.90 3009.09 3049.11 3049.88  
3051.12 3052.11 3053.62 3053.82 3054.58 3057.92  
3058.72 3098.96 3115.83 3121.25 3122.11 3122.50  
3123.23 3129.34 3130.27 3130.91 3131.64 3133.72  
3134.63 3135.17 3136.08 3152.02 3152.59 3152.80  
3153.22 3193.18 3214.09

**R**

13.09 16.01 44.17 66.00 74.87 100.86  
106.32 121.91 127.29 142.31 220.77 226.59  
233.95 239.84 244.05 252.38 267.45 283.61  
287.90 303.51 311.26 313.92 326.73 331.56  
337.59 339.57 345.66 374.67 377.04 384.02  
388.84 401.78 416.29 435.78 447.85 474.75  
506.06 520.02 527.51 532.53 544.46 561.95  
585.74 586.96 599.69 660.22 674.79 678.16  
713.12 740.82 806.42 832.21 853.81 866.16  
869.17 880.98 896.30 930.19 937.59 939.70  
941.80 945.84 948.78 956.77 968.14 975.10  
979.03 981.98 992.05 1022.55 1023.19 1029.34  
1034.21 1054.31 1074.71 1121.04 1141.92 1145.15  
1150.74 1180.98 1183.97 1191.75 1192.10 1193.69  
1235.24 1248.12 1249.03 1263.23 1271.41 1271.62  
1277.97 1298.77 1305.29 1310.04 1345.46 1351.02  
1366.89 1384.06 1414.32 1415.08 1417.79 1418.81  
1422.30 1427.36 1427.68 1437.13 1437.93 1441.77  
1485.42 1486.28 1492.02 1494.05 1496.70 1497.38

1498.89 1501.32 1502.27 1514.25 1516.83 1518.36  
1519.66 1520.27 1523.31 1525.83 1532.56 1541.65  
1541.96 1722.39 3000.31 3016.05 3035.30 3049.75  
3049.87 3051.75 3053.25 3054.49 3055.60 3058.55  
3063.31 3072.30 3121.66 3122.31 3123.24 3123.63  
3130.22 3130.59 3132.08 3134.14 3134.42 3134.48  
3134.86 3137.74 3148.68 3150.87 3152.47 3153.88  
3166.51 3186.88 3208.69

**I**

13.53 28.13 32.59 34.45 40.89 42.75  
48.30 54.24 64.56 65.93 71.94 80.68  
82.93 101.20 122.85 137.29 163.81 183.09  
187.46 190.76 206.81 213.10 235.12 237.45  
251.07 259.64 262.94 265.73 276.84 297.21  
400.95 404.32 406.25 412.12 422.24 439.64  
447.11 461.38 469.87 478.62 502.90 525.24  
545.58 630.87 631.37 633.23 648.65 656.87  
663.34 664.49 696.32 702.69 704.92 708.86  
711.05 712.39 714.05 721.01 760.23 765.62  
769.04 769.85 771.65 866.17 870.31 876.06  
877.86 880.32 934.34 943.22 951.17 952.05  
957.56 979.00 982.92 986.18 987.53 997.33  
1002.18 1005.60 1005.83 1006.03 1011.65 1014.03  
1015.05 1017.30 1035.89 1043.30 1051.82 1053.33  
1053.98 1058.89 1058.92 1095.31 1097.48 1100.61  
1104.46 1108.02 1113.03 1113.96 1115.02 1116.91  
1119.36 1186.21 1186.74 1196.95 1197.94 1198.45  
1217.05 1224.90 1227.34 1242.45 1252.89 1306.28  
1309.07 1321.80 1327.43 1332.71 1359.55 1364.40  
1368.20 1380.10 1390.29 1473.77 1475.73 1479.03  
1487.97 1489.12 1519.36 1521.94 1524.66 1526.21  
1528.27 1624.50 1625.88 1626.61 1628.04 1629.24  
1644.91 1646.09 1647.46 1657.36 1658.27 3159.60  
3171.88 3173.65 3174.97 3178.38 3182.03 3184.99  
3188.44 3191.34 3191.60 3191.83 3193.93 3200.01  
3200.52 3202.95 3205.77 3208.81 3211.16 3212.09  
3215.41 3216.80 3239.25 3239.99 3246.68 3247.02

**I-TS**

-87.90 16.52 26.00 31.03 33.59 39.64  
40.50 49.93 50.45 53.54 58.56 63.60  
67.90 69.29 98.30 108.23 124.53 136.60  
158.20 165.77 180.01 201.14 204.02 216.05  
225.91 229.99 236.81 244.73 249.36 252.58  
257.98 266.66 272.76 296.70 304.61 325.94  
336.15 337.05 372.85 379.90 398.27 407.41  
408.48 409.69 413.10 445.56 448.25 451.11  
456.03 466.75 509.88 517.30 523.98 527.78  
542.64 586.80 625.17 629.91 631.49 633.22  
650.78 664.67 679.16 699.60 705.98 706.66  
708.83 711.20 714.99 718.45 763.38 767.43  
767.61 773.69 800.27 847.90 860.60 867.30  
872.97 879.60 884.96 887.28 936.98 939.94  
943.37 947.22 948.65 963.76 973.44 979.98  
986.46 988.06 989.67 992.78 1001.77 1005.58

1008.69 1013.07 1013.86 1014.83 1016.06 1022.90  
1034.10 1042.36 1051.00 1054.03 1055.37 1056.04  
1100.52 1104.00 1114.07 1115.09 1116.35 1118.48  
1122.35 1125.22 1127.14 1152.11 1187.44 1191.46  
1197.64 1198.15 1198.31 1204.62 1224.63 1228.02  
1233.46 1246.72 1254.24 1270.24 1276.18 1309.65  
1313.67 1327.20 1330.53 1334.29 1365.95 1371.61  
1373.57 1389.03 1414.30 1417.88 1428.38 1438.03  
1475.28 1477.31 1478.88 1486.45 1491.96 1493.22  
1497.41 1501.07 1517.99 1519.35 1522.35 1525.05  
1527.65 1530.18 1531.49 1540.22 1627.07 1629.78  
1631.43 1632.46 1646.96 1647.53 1648.80 1661.23  
1953.25 3046.36 3048.62 3051.37 3055.32 3118.32  
3119.49 3126.21 3128.61 3130.15 3134.65 3148.50  
3158.61 3172.20 3174.47 3175.36 3180.63 3184.50  
3186.04 3188.50 3191.07 3195.32 3197.88 3199.87  
3203.86 3205.04 3208.01 3208.28 3214.20 3216.83  
3226.25 3237.49 3240.36

**1a**

13.84 20.23 25.44 29.67 34.73 38.40  
47.65 50.96 53.51 56.88 61.32 64.23  
74.80 86.77 97.70 114.68 122.80 133.38  
154.10 171.34 173.96 200.26 207.11 214.07  
224.34 228.90 235.43 247.90 249.17 256.28  
264.13 276.05 286.63 297.67 306.06 327.20  
337.13 367.94 379.74 397.81 407.42 408.65  
412.38 413.21 418.91 443.75 449.35 459.31  
465.00 497.93 515.20 523.84 527.40 545.61  
547.67 586.78 613.83 630.22 631.29 632.11  
649.33 664.96 677.64 701.57 704.75 707.11  
708.10 713.25 717.21 721.41 763.85 766.23  
767.54 774.93 799.97 849.38 860.60 863.71  
875.23 877.12 883.56 888.65 938.47 939.61  
940.45 948.05 948.89 968.71 971.39 979.17  
983.92 984.15 993.53 1000.29 1000.74 1002.22  
1013.43 1013.63 1015.89 1016.25 1018.02 1022.78  
1033.05 1040.88 1051.63 1054.67 1055.05 1056.01  
1100.33 1104.18 1114.72 1116.25 1117.15 1120.03  
1123.31 1124.72 1130.11 1159.09 1187.67 1192.56  
1197.77 1197.97 1199.35 1211.34 1225.41 1228.80  
1231.65 1246.91 1255.07 1270.87 1283.96 1309.42  
1311.90 1328.09 1331.26 1335.28 1366.63 1370.14  
1375.03 1388.08 1415.01 1417.64 1427.19 1437.01  
1475.92 1477.22 1479.30 1485.95 1491.77 1492.49  
1497.42 1500.91 1516.75 1519.13 1523.38 1523.54  
1527.88 1530.43 1530.73 1539.71 1628.33 1630.19  
1630.88 1631.34 1647.58 1648.06 1648.86 1661.18  
2093.68 3047.68 3050.48 3052.22 3056.65 3119.40  
3120.84 3128.91 3130.78 3131.68 3143.15 3148.53  
3150.52 3173.68 3175.09 3175.24 3179.31 3184.57  
3185.14 3189.54 3190.14 3194.66 3195.06 3201.10  
3203.35 3203.50 3208.55 3209.33 3214.08 3215.15  
3226.05 3235.09 3250.90

**1b**

14.22 21.88 23.20 30.30 35.23 37.57  
42.04 47.21 50.82 57.56 58.70 61.33  
63.58 74.15 81.63 91.25 99.15 108.73  
115.30 121.07 128.16 140.63 148.61 157.34  
168.37 173.03 185.78 203.21 207.24 218.45  
226.69 234.04 237.19 250.06 254.49 256.84  
263.32 272.79 278.90 299.76 304.47 326.41  
335.77 369.27 378.06 391.70 400.07 408.53  
410.19 411.44 416.82 426.79 440.82 443.93  
448.18 459.74 470.65 502.33 513.94 525.34  
527.47 546.34 586.71 597.52 630.66 631.60  
632.39 633.56 649.17 665.04 666.33 676.39  
679.45 700.35 703.55 704.54 707.97 712.39  
713.63 715.06 718.87 762.40 763.72 766.74  
768.14 773.02 798.75 856.07 856.65 861.81  
872.13 880.03 881.69 884.24 893.00 936.63  
938.13 938.85 942.81 947.04 959.01 962.03  
971.47 976.22 980.66 984.68 988.83 989.17  
997.68 999.27 1002.34 1008.39 1010.21 1014.85  
1015.55 1016.55 1017.65 1022.45 1027.99 1032.95  
1041.60 1052.02 1052.67 1053.72 1055.37 1056.07  
1095.99 1099.18 1100.28 1104.54 1112.76 1114.77  
1117.48 1118.75 1120.03 1122.48 1125.13 1159.13  
1184.44 1186.41 1191.09 1195.82 1197.45 1198.01  
1208.13 1225.74 1228.70 1230.46 1245.80 1252.89  
1255.85 1269.25 1269.64 1308.84 1311.32 1312.06  
1326.20 1328.66 1336.72 1363.54 1370.34 1373.21  
1388.62 1389.77 1413.85 1416.21 1426.13 1435.65  
1474.37 1475.65 1479.16 1485.74 1489.46 1491.84  
1492.48 1497.49 1500.63 1516.71 1518.78 1521.91  
1522.75 1525.26 1527.23 1530.35 1530.84 1539.34  
1626.81 1628.97 1631.50 1631.79 1632.02 1645.75  
1648.34 1648.74 1652.34 1660.72 2094.85 3044.95  
3047.31 3049.14 3053.48 3115.73 3117.32 3125.55  
3127.87 3130.34 3135.26 3146.23 3149.07 3170.31  
3171.96 3173.93 3176.51 3182.52 3183.25 3183.42  
3186.31 3187.84 3191.12 3193.34 3193.53 3197.49  
3198.34 3201.72 3202.30 3203.78 3206.29 3207.49  
3212.75 3215.25 3217.39 3231.30 3245.80 3280.20

**2**

10.71 16.42 26.22 32.03 33.35 41.52  
46.76 48.39 56.89 58.50 64.52 65.28  
72.63 74.68 84.11 89.25 97.03 112.39  
116.86 119.26 145.28 156.33 159.43 170.36  
178.82 193.98 206.44 207.71 223.87 233.34  
235.04 237.82 248.36 250.24 256.99 260.63  
280.46 281.08 289.83 307.20 323.13 337.30  
342.53 375.47 385.59 400.79 405.48 407.44  
409.16 415.98 424.27 435.40 444.04 448.15  
449.52 455.82 468.81 511.15 516.05 527.86  
529.70 542.42 584.01 629.23 630.68 631.99  
634.51 641.38 661.96 663.77 666.74 680.73  
696.99 700.82 706.04 709.21 711.00 714.31  
719.09 720.50 738.58 758.35 763.82 770.52  
773.09 775.35 854.22 860.38 867.09 869.78  
873.97 878.77 891.45 924.86 933.31 935.88

941.98 943.51 949.22 964.61 966.37 972.19  
 978.31 981.14 983.20 992.57 993.76 999.84  
 1001.64 1004.64 1006.17 1010.05 1014.41 1015.55  
 1016.90 1017.19 1020.15 1027.46 1031.20 1037.09  
 1047.11 1053.40 1054.18 1054.55 1055.21 1075.58  
 1090.44 1096.77 1096.90 1103.66 1109.26 1115.13  
 1116.12 1119.24 1122.79 1123.53 1125.05 1182.89  
 1185.86 1186.24 1187.57 1195.84 1196.64 1197.13  
 1221.00 1222.08 1225.07 1231.54 1231.81 1247.17  
 1250.39 1259.37 1262.97 1298.57 1304.33 1320.15  
 1330.11 1332.68 1334.28 1362.10 1366.02 1375.27  
 1387.17 1395.90 1410.89 1413.94 1424.23 1434.53  
 1471.85 1477.63 1480.08 1486.74 1489.93 1494.60  
 1499.16 1499.25 1502.14 1519.47 1521.01 1522.87  
 1524.20 1525.81 1526.59 1528.94 1530.14 1543.04  
 1622.76 1624.21 1624.24 1629.07 1631.22 1646.06  
 1646.59 1647.92 1654.76 1669.34 1999.27 3042.98  
 3046.23 3049.03 3054.81 3108.02 3113.08 3120.22  
 3122.66 3131.12 3143.48 3150.00 3170.56 3170.83  
 3171.93 3172.73 3180.19 3181.57 3182.09 3187.63  
 3189.27 3191.82 3194.07 3197.63 3199.73 3200.22  
 3202.19 3202.39 3204.96 3207.12 3209.07 3214.72  
 3218.72 3229.07 3231.12 3239.90 3256.31 3286.79

**2-TS**

-198.81 15.44 30.70 32.08 38.86 46.77  
 48.09 58.91 61.55 66.26 68.81 72.29  
 75.99 83.36 90.51 101.87 103.97 114.19  
 121.60 126.40 142.72 147.56 158.23 167.85  
 185.98 192.08 198.18 220.58 222.18 231.22  
 234.80 243.58 249.70 255.48 259.00 259.99  
 272.67 279.50 286.55 290.27 311.79 320.19  
 335.40 337.62 380.02 387.78 400.69 406.24  
 414.35 416.70 422.17 432.35 434.23 439.52  
 443.93 458.58 473.67 492.44 511.04 523.73  
 526.93 532.34 545.79 585.74 630.25 632.11  
 633.25 636.16 643.14 647.39 664.58 674.78  
 681.78 700.71 705.03 710.87 711.04 713.94  
 720.98 722.14 742.02 758.39 763.57 770.19  
 771.35 772.10 830.60 840.72 857.45 867.97  
 869.66 874.64 882.26 893.56 911.94 931.12  
 933.86 939.57 942.75 947.08 948.08 959.10  
 975.03 975.48 980.05 984.37 985.87 990.36  
 994.18 999.23 1002.35 1004.57 1008.61 1014.15  
 1015.96 1017.34 1017.44 1023.27 1031.80 1034.25  
 1036.41 1053.33 1053.81 1055.07 1055.55 1060.10  
 1077.90 1098.99 1102.45 1104.60 1110.48 1115.70  
 1116.12 1119.58 1124.25 1125.70 1135.41 1178.64  
 1186.47 1190.35 1193.04 1196.44 1197.52 1199.05  
 1211.59 1223.94 1225.99 1232.44 1247.43 1257.76  
 1262.96 1270.88 1289.46 1306.99 1307.66 1320.34  
 1332.01 1334.98 1355.36 1363.41 1366.30 1369.99  
 1376.73 1396.35 1415.03 1417.90 1428.11 1437.88  
 1466.24 1472.40 1477.52 1481.38 1486.82 1491.02  
 1494.64 1497.80 1501.22 1509.78 1517.89 1520.03  
 1523.81 1526.55 1526.61 1528.90 1531.56 1541.33  
 1566.77 1625.45 1627.67 1628.76 1631.90 1645.64

1647.56 1648.42 1658.14 1667.67 1794.23 3046.67  
 3051.16 3052.58 3058.61 3113.28 3118.40 3124.81  
 3127.91 3129.66 3148.51 3172.38 3172.81 3173.84  
 3175.53 3179.36 3179.94 3183.14 3185.19 3185.46  
 3186.78 3188.94 3193.02 3197.98 3200.58 3201.27  
 3201.73 3208.27 3208.30 3210.74 3211.83 3214.47  
 3215.41 3217.61 3218.75 3237.93 3241.54 3245.27

**3**

16.05 19.22 32.56 35.82 44.74 47.34  
 51.26 58.79 60.69 64.59 71.08 74.55  
 79.21 88.27 95.33 99.68 108.25 113.33  
 116.76 123.97 136.04 138.80 169.35 176.18  
 184.36 192.62 199.93 224.90 225.92 230.90  
 233.01 243.25 255.95 257.39 259.63 269.47  
 276.97 279.46 286.39 309.27 325.76 332.08  
 338.08 377.05 378.97 397.55 405.97 414.64  
 416.93 419.02 421.68 435.93 439.57 443.86  
 459.70 462.68 479.01 510.66 527.13 528.03  
 531.41 544.62 586.85 628.26 630.24 631.82  
 633.55 642.45 644.55 647.83 663.89 680.20  
 687.73 700.17 703.38 709.51 710.10 712.88  
 719.05 720.94 731.41 745.75 757.73 762.95  
 770.81 771.80 823.63 826.16 853.69 854.48  
 866.73 872.48 875.03 893.00 912.71 930.44  
 936.31 938.39 940.73 947.47 948.09 951.84  
 971.14 972.78 978.05 981.31 983.14 989.48  
 993.15 998.31 1001.25 1004.09 1007.46 1014.26  
 1015.80 1017.07 1019.33 1024.03 1024.82 1034.04  
 1035.73 1052.75 1053.60 1053.68 1054.44 1059.80  
 1095.01 1099.07 1100.54 1109.67 1111.32 1114.32  
 1116.51 1117.77 1122.44 1124.76 1147.30 1179.72  
 1185.90 1186.65 1194.79 1195.98 1197.47 1197.73  
 1221.25 1223.27 1226.03 1231.50 1250.78 1255.31  
 1274.69 1303.82 1308.35 1319.44 1325.40 1331.58  
 1334.86 1362.18 1366.21 1372.66 1375.20 1387.58  
 1388.52 1417.70 1418.55 1421.47 1431.06 1440.12  
 1471.34 1475.92 1477.53 1480.23 1486.95 1489.59  
 1493.91 1497.71 1500.41 1502.48 1517.26 1521.24  
 1521.82 1523.77 1525.50 1528.81 1530.85 1540.47  
 1577.88 1624.18 1626.57 1627.41 1631.94 1644.03  
 1646.92 1647.65 1656.94 1683.19 2058.38 3049.85  
 3051.95 3055.77 3059.00 3118.97 3122.89 3128.26  
 3131.03 3133.74 3143.10 3151.20 3172.58 3173.69  
 3174.30 3182.14 3183.62 3184.72 3185.32 3188.90  
 3191.20 3191.61 3192.93 3194.02 3198.28 3200.22  
 3201.70 3205.97 3206.56 3207.54 3211.59 3212.44  
 3212.78 3214.08 3215.92 3230.22 3232.94 3245.03

**4**

21.37 36.25 37.37 43.33 49.85 54.47  
 58.76 63.39 67.13 79.01 80.20 83.79  
 92.86 99.63 104.55 107.07 114.66 123.54  
 137.05 184.64 190.92 211.32 224.46 234.80  
 238.56 251.87 256.89 258.52 266.51 277.49  
 279.99 283.69 304.66 314.81 326.98 341.20



345.17 385.49 391.25 409.24 413.26 416.76  
418.11 434.35 438.57 451.59 458.70 466.39  
484.55 511.68 524.68 525.18 533.55 545.06  
584.58 625.72 627.57 628.93 631.26 641.88  
645.36 677.26 681.72 700.54 707.47 709.97  
713.39 714.89 716.26 748.12 761.09 763.20  
765.16 768.71 825.65 830.02 839.99 852.06  
862.89 871.35 872.38 874.40 938.09 945.26  
947.38 950.39 951.40 958.38 961.86 976.50  
981.01 983.87 985.57 992.41 994.89 1001.18  
1007.34 1009.32 1011.28 1014.86 1016.55 1017.14  
1026.54 1034.95 1046.72 1049.17 1051.03 1052.91  
1068.89 1111.00 1112.70 1114.21 1116.07 1117.66  
1118.43 1119.51 1150.77 1177.85 1184.90 1196.41  
1196.67 1197.33 1198.48 1204.58 1222.56 1225.03  
1229.96 1245.46 1277.95 1296.71 1319.93 1325.47  
1328.48 1333.21 1363.39 1365.35 1366.41 1373.31  
1400.68 1418.19 1421.47 1423.01 1432.78 1442.91  
1464.67 1472.90 1474.98 1477.11 1485.66 1495.69  
1497.39 1502.98 1504.78 1518.65 1522.92 1523.93  
1525.91 1527.61 1528.90 1544.62 1549.92 1624.89  
1626.37 1628.99 1644.45 1644.85 1645.89 1658.41  
2082.52 3051.30 3055.77 3057.82 3070.95 3123.66  
3126.26 3131.16 3135.61 3145.20 3152.86 3154.61  
3167.16 3175.22 3176.71 3177.11 3183.92 3189.02  
3189.50 3189.57 3192.09 3193.81 3196.19 3197.93  
3201.66 3204.46 3205.00 3207.95 3210.57 3217.57  
3225.92 3234.49 3247.61

**4-TS**

-677.30 14.34 20.98 26.21 31.17 39.68  
44.14 49.82 54.25 61.86 73.50 76.44  
82.56 90.13 96.06 104.34 120.45 127.04  
138.77 147.00 173.53 198.24 209.64 214.68  
230.62 235.62 245.67 254.06 256.39 268.56  
277.14 279.65 286.00 305.90 309.75 328.35  
338.66 344.33 379.52 382.92 403.33 409.94  
413.28 417.59 423.19 434.93 441.74 452.81  
464.48 504.29 508.08 522.57 525.09 534.09  
535.45 585.73 615.21 630.46 631.63 631.95  
633.10 643.44 669.58 678.32 698.81 707.25  
711.87 713.71 716.55 719.10 753.75 762.66  
764.30 768.62 784.30 818.82 830.46 850.95  
863.12 870.28 872.20 877.64 916.20 939.34  
941.30 941.83 943.06 946.36 949.35 971.61  
974.27 980.09 985.47 990.50 996.24 1001.97  
1003.17 1004.86 1010.72 1014.48 1014.62 1015.73  
1023.48 1030.36 1048.28 1052.31 1052.68 1054.32  
1108.15 1109.11 1110.90 1113.88 1116.49 1117.91  
1120.23 1122.91 1146.71 1165.21 1179.91 1194.58  
1195.97 1197.32 1197.91 1198.95 1221.45 1226.05  
1229.60 1247.55 1274.44 1300.36 1315.59 1324.63  
1330.10 1333.69 1362.08 1362.85 1367.51 1370.70  
1388.56 1418.12 1421.13 1428.63 1433.11 1441.10  
1457.84 1474.10 1475.65 1478.25 1486.43 1487.34  
1493.63 1497.24 1502.74 1505.63 1516.50 1522.29  
1525.05 1525.20 1527.59 1529.30 1540.75 1626.89

1628.77 1629.60 1645.24 1645.40 1646.85 1656.00  
2073.35 3051.84 3055.41 3057.55 3062.48 3124.20  
3126.12 3131.46 3135.84 3137.67 3145.58 3152.32  
3155.43 3172.46 3173.55 3174.96 3178.58 3183.70  
3187.37 3188.23 3196.24 3198.10 3200.21 3203.25  
3209.11 3211.29 3213.40 3218.08 3219.68 3221.72  
3223.10 3236.62 3244.19

**4'**

13.33 20.16 22.48 27.60 31.00 40.46  
49.72 51.56 61.13 64.64 65.36 79.02  
85.96 98.04 108.35 111.78 118.72 125.67  
171.49 181.17 192.57 212.61 221.01 229.37  
233.85 249.65 251.55 253.00 261.35 267.98  
274.68 277.81 307.82 317.77 327.64 331.57  
340.99 386.20 386.58 407.61 408.12 412.65  
417.40 428.93 440.34 448.06 452.40 458.40  
471.48 512.52 522.07 524.10 531.40 543.54  
584.20 612.42 628.54 630.62 632.17 634.49  
644.28 675.74 677.93 698.85 701.96 706.97  
709.97 712.29 715.76 719.79 762.29 766.16  
768.44 789.28 822.10 826.85 832.19 852.78  
863.12 866.76 873.32 876.66 937.59 940.97  
943.60 944.22 946.00 949.80 952.73 957.12  
975.70 978.71 981.86 983.43 990.40 997.71  
1003.19 1005.76 1010.28 1014.49 1016.33 1016.54  
1025.50 1032.81 1039.53 1051.11 1053.06 1054.87  
1072.49 1112.17 1114.29 1114.84 1116.47 1118.52  
1120.31 1122.37 1151.10 1163.89 1182.69 1194.40  
1197.16 1197.90 1198.14 1221.77 1224.76 1230.24  
1236.72 1246.85 1275.81 1298.01 1326.52 1327.71  
1333.67 1354.03 1363.26 1364.06 1364.92 1373.12  
1415.17 1418.53 1421.95 1424.00 1432.04 1443.21  
1467.33 1474.00 1476.13 1478.54 1484.29 1485.43  
1494.62 1497.43 1502.62 1518.99 1521.96 1524.48  
1525.94 1526.58 1529.13 1543.27 1574.10 1624.88  
1629.18 1630.78 1644.32 1646.62 1647.73 1682.24  
2129.60 3050.45 3054.27 3055.62 3060.36 3122.55  
3125.46 3130.01 3133.62 3135.65 3149.18 3149.68  
3159.42 3172.94 3172.97 3175.09 3176.06 3180.51  
3183.99 3186.38 3188.34 3191.40 3198.71 3199.01  
3199.36 3205.79 3206.31 3210.68 3216.17 3219.06  
3220.85 3244.83 3252.06

**4'-TS**

-746.64 12.72 21.31 30.06 32.04 34.96  
39.82 46.55 54.59 57.06 60.21 72.58  
78.25 93.64 97.46 108.78 118.05 125.19  
140.64 164.63 189.36 206.33 211.55 222.82  
225.19 227.04 239.71 253.08 262.54 268.03  
273.65 281.62 288.53 311.55 317.24 321.58  
335.66 339.81 379.75 388.73 407.55 408.26  
411.02 415.60 429.33 443.93 450.84 455.27  
457.80 491.24 514.17 519.23 526.07 531.47  
540.63 584.68 605.28 624.46 631.00 632.25  
633.13 641.59 667.46 678.29 700.85 707.71

708.61 711.54 712.28 717.54 719.19 764.82  
767.48 770.04 782.44 787.28 822.82 844.69  
866.66 870.19 871.20 873.44 928.99 937.71  
937.87 938.96 940.99 945.20 948.40 951.37  
973.24 981.32 982.90 985.72 990.50 1004.27  
1006.85 1010.66 1012.37 1014.40 1015.62 1016.47  
1024.11 1033.03 1051.45 1053.34 1054.01 1054.15  
1107.16 1112.06 1112.94 1115.41 1119.13 1120.39  
1123.02 1143.99 1148.69 1180.08 1194.72 1196.53  
1197.62 1198.32 1217.75 1221.20 1224.88 1228.54  
1231.89 1249.13 1275.12 1302.48 1326.30 1330.70  
1333.22 1339.32 1355.53 1362.08 1365.13 1370.97  
1401.02 1417.85 1418.29 1422.37 1431.75 1443.90  
1444.92 1468.27 1475.20 1476.35 1478.23 1487.27  
1490.59 1496.92 1502.02 1514.69 1520.21 1523.97  
1526.45 1527.27 1528.56 1542.00 1568.54 1627.74  
1628.56 1629.67 1646.09 1646.52 1647.69 1687.16  
2035.74 3050.54 3054.13 3055.16 3059.81 3118.16  
3126.32 3128.00 3131.59 3133.07 3137.13 3149.29  
3151.04 3169.65 3169.92 3172.93 3174.41 3177.77  
3184.08 3188.24 3190.31 3193.20 3199.50 3200.49  
3203.23 3203.72 3206.90 3212.92 3212.97 3217.42  
3217.87 3241.62 3256.05

**5**

19.97 25.88 32.20 42.01 45.99 52.34  
57.95 70.48 77.55 81.68 84.08 93.12  
94.28 104.43 112.67 115.91 120.11 130.82  
170.65 188.04 201.86 211.98 223.33 232.15  
236.34 244.55 251.25 253.59 260.50 278.88  
282.71 287.82 301.73 321.13 325.54 333.62  
336.64 364.85 382.34 390.76 407.90 412.51  
415.31 422.24 435.72 442.15 447.69 461.50  
470.09 503.25 526.69 527.22 532.41 537.95  
571.32 583.95 601.36 628.88 630.14 630.96  
631.41 665.75 676.69 697.48 705.34 710.66  
715.34 716.83 721.13 762.07 765.46 771.25  
780.31 812.84 848.68 856.15 861.03 873.89  
877.22 879.19 909.57 938.22 939.07 943.04  
944.91 949.47 956.67 958.06 976.55 979.19  
980.27 982.04 997.07 999.02 1004.14 1009.74  
1012.08 1016.22 1017.26 1020.33 1023.24 1024.71  
1034.54 1049.48 1050.82 1052.85 1053.51 1093.55  
1111.49 1113.45 1115.56 1118.10 1118.91 1122.48  
1124.01 1148.14 1175.26 1183.51 1194.82 1197.66  
1198.15 1198.82 1223.52 1228.58 1232.26 1248.12  
1255.10 1274.77 1284.76 1302.32 1321.50 1331.26  
1334.12 1362.26 1364.74 1371.66 1373.70 1374.16  
1394.35 1417.14 1421.00 1430.62 1440.62 1456.81  
1461.95 1472.32 1477.07 1478.87 1486.57 1494.23  
1497.14 1501.73 1510.78 1516.94 1520.92 1523.30  
1523.76 1526.26 1529.15 1530.50 1540.72 1559.24  
1624.91 1627.72 1630.21 1644.90 1645.97 1646.75  
2996.28 3049.55 3054.08 3054.91 3060.04 3116.85  
3118.42 3124.63 3129.72 3131.82 3135.21 3146.15  
3150.40 3173.85 3174.61 3175.24 3175.82 3183.27  
3183.50 3185.93 3190.43 3195.66 3196.23 3199.34

3200.93 3201.30 3203.73 3206.00 3206.54 3212.07  
3216.97 3227.43 3248.48

**5'**

11.54 23.02 27.49 28.60 38.29 49.93  
58.06 62.21 67.33 74.19 81.81 87.90  
95.43 101.54 109.38 112.07 116.95 127.00  
129.73 176.79 190.16 223.97 225.49 228.66  
235.23 238.35 244.57 252.13 261.32 275.71  
283.98 284.74 300.65 314.26 324.83 333.53  
336.63 375.90 379.15 389.83 406.20 413.82  
418.01 424.66 437.97 445.28 452.69 469.05  
476.36 504.40 526.11 526.99 530.59 533.85  
557.41 585.99 610.61 627.65 629.56 631.66  
632.29 663.60 678.98 697.34 704.34 711.17  
714.51 716.54 720.91 742.15 761.21 765.12  
770.80 814.67 849.99 859.91 863.15 872.59  
875.88 877.98 888.37 936.48 938.48 941.12  
949.21 950.59 957.72 962.92 969.81 977.59  
980.11 980.25 994.53 1000.09 1001.01 1005.96  
1009.74 1010.29 1015.54 1016.17 1019.27 1023.08  
1032.47 1040.83 1048.85 1053.03 1054.37 1091.94  
1110.46 1113.05 1116.33 1117.32 1119.59 1122.45  
1138.55 1147.75 1183.31 1194.49 1198.53 1198.85  
1199.72 1210.39 1223.23 1228.45 1234.25 1235.23  
1250.18 1273.52 1303.39 1319.97 1321.91 1331.37  
1334.65 1351.45 1364.32 1371.59 1373.76 1375.90  
1398.25 1416.90 1420.67 1430.21 1434.05 1440.40  
1466.32 1471.98 1476.88 1479.50 1487.09 1492.84  
1493.62 1497.99 1501.71 1517.01 1520.54 1524.51  
1525.32 1528.32 1529.66 1539.69 1541.24 1624.25  
1627.80 1630.39 1643.72 1645.95 1647.09 1725.33  
2960.96 3021.88 3049.55 3051.75 3054.18 3058.06  
3116.50 3124.12 3130.33 3131.49 3132.97 3138.11  
3150.82 3175.80 3176.07 3176.28 3177.30 3178.74  
3184.62 3186.24 3187.34 3193.18 3196.84 3197.99  
3198.93 3200.40 3203.39 3204.40 3207.05 3208.91  
3213.05 3227.27 3273.02

**5-TS**

-127.07 21.94 25.00 30.23 33.33 42.54  
43.39 46.19 51.18 59.42 60.16 60.62  
67.30 69.68 76.80 85.74 94.67 96.04  
101.08 111.06 122.55 127.76 132.10 151.95  
157.28 165.14 183.32 198.43 207.29 216.64  
220.56 226.36 229.39 236.21 242.72 245.52  
247.89 258.59 262.61 264.42 272.94 286.31  
294.54 302.78 304.47 315.75 320.23 325.28  
327.77 334.68 337.13 341.26 364.48 371.17  
377.11 385.23 390.72 406.36 407.46 409.58  
415.86 419.65 446.33 448.38 453.49 454.94  
456.51 507.22 521.37 522.89 526.86 527.53  
532.14 540.02 568.44 584.63 584.97 602.44  
623.30 627.76 630.12 631.60 632.72 663.02  
676.69 677.40 701.62 705.70 708.82 711.85  
715.74 719.32 754.38 765.69 768.44 769.14

795.82 813.96 822.39 845.43 857.04 862.06  
872.51 873.98 874.44 878.50 890.61 940.11  
942.01 942.17 944.35 946.21 946.76 948.00  
949.40 949.77 962.65 972.20 976.07 983.53  
984.27 985.35 987.68 989.18 992.16 1003.94  
1011.25 1012.55 1012.75 1015.67 1016.79 1017.94  
1022.39 1022.89 1030.98 1034.38 1049.20 1051.66  
1054.06 1055.31 1112.87 1114.54 1114.96 1117.07  
1119.64 1121.11 1122.35 1124.86 1146.99 1150.86  
1165.92 1183.52 1191.00 1192.73 1195.01 1195.89  
1198.38 1199.53 1204.82 1221.38 1230.39 1233.62  
1247.10 1247.91 1271.45 1274.41 1278.11 1279.38  
1292.73 1303.30 1308.16 1327.63 1329.39 1333.07  
1362.14 1369.04 1370.78 1373.04 1373.90 1414.14  
1414.26 1417.05 1418.58 1420.07 1428.89 1429.79  
1438.39 1439.70 1457.72 1475.75 1476.52 1478.07  
1486.45 1486.55 1492.47 1494.26 1497.35 1497.42  
1500.34 1501.65 1504.66 1507.45 1516.86 1517.52  
1518.77 1522.66 1522.94 1524.07 1525.60 1529.77  
1530.83 1539.47 1542.39 1582.99 1628.27 1628.70  
1631.01 1646.46 1646.93 1647.64 1673.01 1949.59  
2945.34 3047.24 3049.12 3049.44 3052.04 3053.30  
3055.40 3056.05 3065.56 3118.09 3120.14 3121.38  
3123.55 3128.15 3129.33 3129.38 3130.70 3132.45  
3135.12 3139.62 3140.21 3148.45 3149.90 3157.41  
3158.52 3163.63 3172.34 3174.59 3176.38 3182.08  
3185.18 3189.74 3190.01 3198.67 3199.17 3200.59  
3206.02 3209.43 3210.09 3211.26 3215.83 3223.09  
3246.31 3249.89 3264.18

**6**

11.63 23.92 26.26 28.80 34.99 42.65  
43.10 48.80 49.77 56.98 58.85 65.24  
71.17 74.61 79.80 83.90 93.58 100.64  
107.83 113.12 116.75 124.77 125.95 148.86  
161.97 183.94 196.94 212.21 215.32 219.03  
228.28 230.85 232.61 245.02 247.80 249.53  
257.10 259.94 265.69 266.33 275.65 283.89  
297.53 303.65 306.09 321.21 324.78 325.45  
335.26 335.37 342.65 364.71 380.68 382.35  
388.19 392.15 406.22 409.53 412.54 413.60  
420.67 422.80 443.75 453.85 456.66 459.18  
493.67 514.80 522.48 525.87 528.07 532.01  
540.45 572.24 584.78 584.94 592.51 602.47  
625.36 631.00 631.18 631.61 657.78 664.09  
676.04 677.46 701.34 708.52 709.60 712.72  
717.24 721.37 759.91 766.03 768.93 769.85  
799.72 812.75 833.98 844.87 858.68 867.95  
873.13 874.21 875.26 875.53 888.70 934.91  
940.37 943.18 943.99 946.27 947.77 948.86  
949.25 950.14 960.75 971.75 972.70 980.44  
983.07 984.11 989.61 991.65 993.39 1005.39  
1012.34 1013.65 1015.42 1017.23 1020.56 1020.66  
1022.15 1024.04 1029.60 1034.06 1045.12 1051.32  
1054.43 1055.28 1111.65 1115.20 1116.86 1117.17  
1119.05 1122.29 1124.56 1132.93 1146.73 1159.04  
1161.97 1184.21 1185.62 1192.30 1195.14 1195.68

1198.52 1198.62 1215.45 1221.65 1230.31 1233.51  
1244.59 1247.44 1271.94 1274.80 1277.35 1291.03  
1296.20 1302.23 1306.77 1327.36 1330.97 1333.59  
1363.01 1366.55 1371.42 1372.36 1375.78 1408.14  
1414.86 1416.75 1419.74 1419.77 1429.38 1429.58  
1439.41 1439.69 1452.49 1475.30 1476.93 1478.17  
1485.75 1485.84 1493.09 1493.80 1496.14 1496.21  
1500.78 1501.32 1505.15 1512.07 1516.12 1516.42  
1519.48 1522.23 1522.66 1523.84 1525.95 1530.06  
1531.30 1539.73 1540.45 1560.94 1627.39 1628.85  
1631.10 1646.66 1647.12 1647.84 1668.81 2118.26  
2958.95 3046.94 3049.09 3050.47 3051.27 3053.15  
3055.38 3056.35 3067.62 3117.62 3118.56 3122.23  
3123.25 3128.03 3129.04 3129.54 3132.11 3132.52  
3137.25 3141.16 3142.63 3147.28 3150.25 3154.47  
3156.54 3159.88 3171.52 3173.77 3177.30 3177.63  
3184.12 3187.00 3190.60 3196.51 3198.23 3198.55  
3205.09 3205.96 3210.24 3210.61 3212.38 3218.44  
3235.04 3236.93 3252.34

**6-TS**

-659.22 14.09 24.14 26.08 30.26 35.16  
40.69 42.36 48.48 54.39 57.22 59.04  
64.50 70.02 78.64 82.52 92.56 99.08  
102.25 112.95 117.37 118.37 127.30 131.59  
144.87 148.07 189.65 201.91 214.01 224.92  
227.57 229.21 236.17 243.56 243.82 253.15  
255.89 258.22 260.14 277.54 284.17 289.96  
296.54 304.68 306.37 319.17 325.72 327.59  
334.28 336.49 341.75 363.79 365.02 379.97  
383.48 392.76 406.30 411.72 412.15 415.71  
418.59 427.14 440.87 446.91 450.32 457.83  
473.43 495.28 513.39 524.71 526.02 527.00  
533.16 535.83 580.38 584.62 586.45 596.39  
615.76 630.80 631.74 632.45 638.68 664.28  
675.65 678.96 701.24 708.87 709.85 712.31  
717.12 718.82 751.07 764.49 766.31 767.85  
770.79 798.98 809.59 839.40 856.72 859.50  
867.67 870.67 873.41 873.80 874.86 912.26  
939.53 940.30 941.54 942.30 943.77 945.08  
949.33 949.66 964.47 970.79 971.43 979.48  
983.46 984.95 986.21 987.27 989.21 1002.93  
1007.24 1011.36 1015.65 1016.57 1017.48 1022.76  
1023.87 1030.34 1034.36 1044.77 1051.18 1054.52  
1054.61 1104.68 1113.72 1115.82 1117.25 1119.89  
1120.87 1123.74 1133.03 1138.19 1145.40 1156.53  
1161.66 1168.92 1184.57 1192.49 1195.26 1195.40  
1198.22 1198.43 1215.75 1220.94 1228.50 1231.79  
1245.27 1249.08 1271.56 1273.51 1281.71 1291.70  
1300.11 1304.99 1308.50 1326.93 1329.99 1333.91  
1356.82 1361.83 1366.73 1369.12 1374.54 1381.72  
1414.55 1416.85 1419.57 1419.88 1429.35 1429.57  
1439.31 1439.61 1445.08 1459.43 1474.99 1476.71  
1478.28 1485.78 1487.25 1493.07 1494.41 1496.65  
1498.17 1500.61 1502.05 1506.06 1513.16 1517.16  
1518.74 1519.15 1522.23 1524.06 1524.78 1525.17  
1529.35 1531.47 1539.83 1542.52 1627.84 1628.79

1629.68 1645.98 1646.77 1647.60 1664.22 1965.26  
 2984.72 3045.58 3048.93 3049.62 3050.68 3052.90  
 3054.86 3055.75 3062.53 3116.24 3117.72 3122.51  
 3122.67 3125.65 3127.56 3129.00 3130.39 3131.22  
 3132.56 3138.15 3140.72 3146.76 3149.43 3151.92  
 3157.84 3160.73 3163.73 3172.03 3173.20 3176.21  
 3183.31 3183.40 3190.36 3191.58 3195.15 3199.79  
 3200.49 3203.22 3204.09 3213.47 3214.10 3214.27  
 3220.65 3228.18 3242.00

**6'-TS**

-427.01 13.58 17.31 26.08 32.99 40.56  
 41.59 44.94 49.67 55.57 57.40 59.73  
 65.34 68.44 76.75 84.17 89.50 95.45  
 98.55 106.76 116.12 121.02 136.38 138.06  
 151.13 169.08 188.73 203.22 213.02 223.43  
 228.33 232.63 236.96 248.08 249.96 255.03  
 259.60 264.70 268.70 276.30 283.05 294.19  
 298.61 305.12 311.77 317.16 330.51 331.11  
 340.89 344.36 366.30 369.18 379.97 382.44  
 390.89 394.82 406.77 411.24 412.85 417.05  
 420.77 428.05 440.83 449.25 455.71 457.83  
 479.09 499.10 512.26 521.33 524.24 524.71  
 531.89 533.91 582.79 585.62 586.80 592.37  
 603.80 630.52 631.40 631.88 645.32 660.90  
 672.22 673.15 701.93 708.58 709.09 715.49  
 719.39 722.03 736.65 764.57 765.12 772.26  
 798.94 806.01 840.36 846.70 852.73 855.42  
 865.07 868.35 872.54 876.85 884.49 918.87  
 935.50 939.63 941.52 944.85 948.65 948.85  
 951.08 956.47 961.00 970.82 977.71 979.04  
 982.08 982.82 985.59 995.11 1002.17 1002.54  
 1005.41 1014.57 1014.92 1016.82 1023.44 1026.04  
 1027.66 1030.63 1032.70 1039.57 1049.15 1053.56  
 1054.76 1102.68 1112.59 1113.30 1115.31 1120.31  
 1123.01 1125.46 1130.69 1142.46 1149.75 1157.68  
 1161.83 1184.79 1192.10 1192.55 1193.01 1197.62  
 1197.76 1212.20 1220.02 1221.60 1231.00 1244.59  
 1246.78 1254.63 1272.23 1272.74 1278.40 1294.78  
 1299.51 1303.09 1306.87 1326.79 1330.33 1333.00  
 1342.08 1361.33 1364.42 1371.63 1373.79 1385.48  
 1415.32 1416.11 1418.05 1419.20 1420.76 1428.58  
 1430.86 1438.39 1442.64 1446.01 1474.29 1475.87  
 1477.83 1486.02 1487.00 1493.60 1495.17 1497.63  
 1498.20 1500.38 1501.15 1505.52 1506.05 1518.89  
 1519.80 1522.81 1523.24 1523.72 1524.35 1526.51  
 1530.42 1531.63 1541.73 1547.93 1627.73 1628.06  
 1629.59 1645.60 1646.33 1647.27 1675.33 1865.99  
 2961.94 3047.33 3048.61 3051.17 3051.27 3051.81  
 3053.91 3056.89 3059.93 3119.12 3119.76 3119.82  
 3119.99 3126.47 3130.27 3131.83 3132.65 3133.34  
 3134.43 3135.49 3140.59 3145.26 3147.92 3148.11  
 3153.05 3154.04 3158.99 3172.54 3173.39 3174.36  
 3179.94 3180.04 3184.60 3187.57 3189.48 3190.55  
 3196.85 3197.74 3200.40 3204.46 3205.55 3207.73  
 3219.21 3226.53 3234.45

**7**

10.82 21.26 31.87 34.92 39.52 47.61  
 50.40 54.65 61.11 64.17 67.18 69.23  
 73.30 78.03 85.31 89.84 96.53 100.67  
 109.38 114.99 125.66 133.22 138.42 160.21  
 161.93 194.67 201.12 207.25 218.59 222.25  
 231.14 238.71 242.65 253.89 256.48 259.85  
 266.26 267.53 272.98 274.28 280.19 290.17  
 301.57 306.21 311.20 329.19 329.72 343.25  
 345.42 359.50 366.42 367.66 384.21 389.77  
 393.37 401.36 407.52 411.60 414.12 415.29  
 420.96 425.06 444.03 452.69 456.73 458.70  
 502.25 516.80 518.61 522.25 524.17 525.85  
 536.93 547.50 584.10 585.45 586.99 604.89  
 613.77 630.66 631.27 632.82 661.81 672.34  
 675.79 701.57 706.97 709.16 713.88 718.63  
 719.35 764.42 767.28 767.94 797.35 798.45  
 811.19 841.22 849.45 852.25 863.73 864.53  
 867.58 874.83 876.05 878.79 915.87 939.48  
 941.54 943.18 943.96 945.28 947.00 947.56  
 949.75 970.57 973.27 979.78 982.05 983.38  
 986.19 992.39 998.70 1004.94 1007.42 1012.13  
 1014.26 1016.64 1017.20 1024.41 1027.12 1033.39  
 1033.49 1035.29 1052.59 1052.88 1054.08 1061.89  
 1099.06 1113.05 1114.21 1116.00 1119.61 1120.24  
 1124.00 1126.87 1130.74 1146.15 1151.74 1155.73  
 1184.05 1191.55 1192.20 1195.88 1198.07 1198.25  
 1207.90 1222.93 1223.56 1231.61 1239.11 1243.20  
 1245.05 1272.19 1272.79 1273.68 1286.67 1290.54  
 1300.49 1305.76 1327.75 1330.99 1332.76 1352.01  
 1361.11 1364.00 1365.08 1374.47 1390.35 1414.73  
 1415.95 1418.49 1421.80 1422.28 1427.49 1431.70  
 1438.02 1443.17 1453.68 1462.09 1475.76 1477.10  
 1477.78 1485.63 1486.50 1494.69 1495.40 1497.45  
 1499.36 1502.19 1504.85 1506.65 1516.50 1519.84  
 1520.47 1522.76 1522.79 1523.74 1525.54 1526.84  
 1527.74 1531.48 1543.63 1549.68 1552.93 1627.32  
 1628.50 1628.69 1645.66 1646.32 1647.16 3006.36  
 3021.04 3045.60 3047.49 3048.24 3050.59 3051.28  
 3053.01 3055.89 3060.88 3097.58 3117.88 3118.06  
 3119.11 3119.37 3125.40 3128.56 3128.65 3129.75  
 3131.79 3132.88 3133.96 3134.29 3147.56 3148.64  
 3153.06 3159.25 3172.28 3173.03 3175.72 3176.17  
 3178.50 3184.17 3187.08 3190.52 3195.56 3199.78  
 3202.59 3203.00 3207.70 3212.07 3229.75 3237.77  
 3238.53 3242.85 3244.32

**7'**

21.92 25.22 30.61 31.93 37.77 39.16  
 47.41 50.00 53.56 56.08 65.30 66.96  
 73.54 78.84 85.64 93.40 98.29 101.68  
 110.17 110.57 115.32 121.04 129.76 135.08  
 160.80 198.20 212.18 221.71 224.20 228.94  
 235.44 240.82 249.73 252.02 252.70 257.65  
 261.67 262.89 276.00 276.74 280.37 298.43  
 300.71 304.13 313.85 324.12 324.90 329.23

333.31 336.44 360.38 365.32 381.56 387.09  
394.45 406.79 408.77 411.26 415.53 416.47  
427.71 447.03 449.81 453.12 470.13 476.26  
484.94 498.41 515.42 523.44 524.55 524.82  
532.00 550.17 585.50 585.92 594.85 607.91  
630.91 631.95 632.54 655.15 659.67 674.09  
676.02 700.38 707.48 712.13 714.33 719.82  
721.24 753.47 764.46 768.36 769.47 802.99  
807.97 847.58 853.08 865.02 867.55 874.85  
876.62 877.32 878.07 882.33 933.81 940.96  
941.33 942.77 946.03 948.57 949.61 949.70  
951.67 963.15 971.68 974.70 982.52 983.71  
983.74 993.03 995.21 1005.27 1013.27 1013.93  
1015.25 1016.16 1020.94 1024.42 1026.52 1032.11  
1034.32 1049.37 1050.78 1053.31 1054.29 1055.12  
1070.54 1110.90 1113.64 1114.90 1116.80 1120.34  
1122.08 1122.81 1123.44 1133.53 1152.50 1157.34  
1184.82 1191.27 1193.65 1197.71 1198.23 1199.10  
1206.47 1212.54 1226.91 1229.78 1232.33 1243.20  
1246.21 1259.52 1268.96 1271.39 1273.67 1289.85  
1297.70 1302.86 1305.93 1326.67 1330.00 1334.54  
1344.77 1368.42 1373.02 1375.16 1377.39 1405.13  
1415.45 1415.90 1419.72 1421.14 1424.66 1429.28  
1431.26 1439.07 1443.82 1465.19 1474.24 1477.45  
1478.84 1485.20 1485.59 1488.83 1494.04 1494.07  
1495.36 1496.63 1501.22 1503.37 1518.02 1518.09  
1519.45 1520.74 1521.80 1522.80 1523.30 1528.65  
1529.74 1531.51 1540.53 1544.75 1625.39 1627.82  
1631.08 1645.96 1647.03 1648.23 1689.89 2956.66  
2971.59 3046.60 3046.93 3049.84 3051.37 3051.51  
3051.58 3056.89 3057.66 3069.67 3115.03 3117.34  
3119.71 3121.54 3126.68 3127.12 3129.66 3130.65  
3130.83 3132.17 3136.40 3138.28 3146.90 3147.55  
3150.01 3153.95 3155.14 3161.47 3167.97 3175.54  
3175.94 3176.69 3182.87 3185.15 3187.04 3187.73  
3190.93 3199.78 3199.98 3200.19 3206.07 3209.58  
3210.37 3215.76 3228.36

**8**

13.97 18.08 19.73 22.85 27.65 32.56  
36.64 40.25 44.81 49.25 58.82 60.39  
62.27 66.23 67.08 78.66 83.32 87.42  
91.46 98.19 104.93 108.45 115.37 118.52  
124.15 139.80 147.59 153.20 167.11 178.77  
193.26 198.12 208.13 217.38 226.37 227.04  
233.16 239.36 239.97 244.76 250.57 253.55  
256.32 259.91 270.24 275.89 281.65 289.33  
301.56 303.59 306.33 321.27 323.12 326.69  
331.87 336.68 347.75 364.43 379.27 382.76  
391.02 398.41 405.97 407.24 409.73 414.65  
419.39 419.84 426.15 437.36 448.14 453.45  
462.10 469.18 497.92 509.88 520.39 522.22  
526.01 528.63 534.24 543.39 585.91 586.32  
595.00 600.46 631.44 632.34 633.17 633.86  
646.71 660.34 665.92 674.08 675.22 699.77  
703.23 704.04 712.24 713.11 717.04 718.97  
754.00 760.37 765.51 769.10 770.02 786.74

803.35 811.77 850.60 853.76 858.42 866.20  
870.36 874.53 876.22 878.87 884.96 929.80  
934.99 940.08 940.86 944.71 946.76 947.12  
952.33 953.63 955.61 969.15 974.04 979.58  
983.00 984.69 986.36 987.73 994.91 1000.67  
1004.14 1005.59 1007.56 1012.62 1016.00 1017.00  
1020.53 1022.26 1023.76 1026.17 1031.03 1033.36  
1037.73 1053.84 1055.11 1055.73 1059.17 1072.77  
1100.53 1108.69 1112.75 1114.48 1116.71 1117.04  
1120.33 1121.30 1123.49 1124.42 1129.61 1146.91  
1156.45 1178.97 1187.13 1190.32 1190.45 1192.63  
1198.64 1199.19 1199.57 1207.75 1225.74 1230.07  
1233.10 1242.19 1250.70 1257.17 1264.04 1270.68  
1270.78 1278.10 1283.03 1298.18 1303.38 1305.97  
1310.05 1324.39 1330.77 1335.15 1346.89 1357.74  
1365.54 1371.79 1374.47 1376.70 1394.30 1403.00  
1414.60 1415.37 1417.41 1419.30 1427.09 1428.76  
1436.69 1438.82 1442.20 1474.80 1478.48 1480.39  
1483.87 1485.98 1486.56 1491.28 1493.71 1494.65  
1495.99 1499.49 1500.81 1502.33 1509.49 1517.05  
1517.34 1519.69 1520.26 1522.07 1523.96 1529.27  
1529.97 1531.46 1533.89 1536.37 1541.38 1543.09  
1627.07 1629.73 1631.49 1632.33 1647.45 1648.52  
1649.05 1662.76 1701.33 2979.56 3016.16 3046.76  
3048.47 3050.28 3050.82 3052.33 3052.50 3056.86  
3057.10 3076.97 3113.90 3119.06 3119.61 3119.99  
3120.87 3121.22 3127.43 3129.19 3131.06 3131.45  
3132.42 3133.86 3138.75 3145.12 3146.50 3149.40  
3150.64 3154.36 3172.83 3173.70 3175.47 3176.90  
3183.37 3183.89 3186.01 3188.49 3191.59 3197.50  
3197.69 3198.92 3199.53 3206.17 3206.86 3207.65  
3208.34 3214.16 3215.59 3226.88 3237.56 3278.47

**8'**

16.75 20.29 25.33 30.65 32.97 33.78  
37.53 43.45 44.90 49.64 52.66 55.95  
56.84 62.29 68.26 72.85 76.63 80.71  
85.00 92.24 99.64 105.66 117.13 123.95  
128.20 131.93 153.24 163.36 165.80 176.29  
182.74 198.04 202.93 208.68 227.54 228.97  
232.33 244.11 245.60 248.77 251.69 258.48  
260.45 268.10 275.26 276.49 278.73 287.56  
295.22 306.85 310.44 312.68 327.38 329.32  
336.06 337.36 346.36 365.81 379.71 385.06  
388.58 394.04 407.22 409.82 412.13 416.11  
417.09 428.43 438.30 441.90 450.85 457.92  
464.94 468.33 485.29 502.22 514.37 524.88  
525.15 526.07 534.40 543.79 585.58 587.09  
591.52 600.01 629.05 631.49 632.12 647.35  
657.57 666.05 667.97 677.33 678.37 698.72  
705.50 708.20 710.88 713.62 716.03 720.77  
739.62 761.95 767.21 769.29 772.55 803.65  
807.48 853.54 862.14 862.99 866.62 872.75  
874.06 881.95 884.62 890.26 897.62 922.06  
936.21 939.64 944.73 946.72 949.70 951.17  
952.53 956.15 958.28 969.02 972.72 978.83  
978.91 981.64 985.19 992.82 993.24 1002.76

1005.78 1010.18 1011.08 1015.32 1016.62 1017.49  
 1022.10 1024.35 1027.28 1030.75 1035.58 1040.04  
 1050.91 1054.62 1055.54 1055.99 1058.92 1089.48  
 1099.87 1106.57 1113.60 1114.66 1115.67 1115.76  
 1118.62 1121.14 1126.09 1133.94 1142.91 1156.27  
 1167.98 1181.64 1187.76 1189.92 1190.78 1192.22  
 1198.41 1198.70 1199.17 1208.83 1224.70 1230.23  
 1231.46 1239.17 1240.23 1250.72 1260.47 1269.34  
 1272.42 1281.73 1292.48 1301.20 1303.08 1309.53  
 1317.19 1322.32 1326.98 1331.38 1334.50 1350.83  
 1366.01 1372.94 1373.81 1381.59 1399.27 1401.98  
 1415.07 1416.61 1418.23 1423.11 1427.44 1430.93  
 1435.88 1437.00 1442.38 1474.78 1478.38 1479.06  
 1485.02 1486.06 1487.38 1493.50 1495.28 1495.86  
 1497.17 1499.85 1502.09 1503.48 1515.79 1518.15  
 1519.08 1520.78 1523.42 1524.91 1528.63 1528.98  
 1529.99 1530.83 1531.96 1536.86 1542.62 1546.38  
 1627.36 1629.29 1631.46 1632.14 1647.05 1649.21  
 1650.04 1663.77 1722.77 2946.75 3033.64 3045.80  
 3047.20 3048.72 3048.98 3050.42 3052.48 3055.13  
 3056.35 3060.47 3089.48 3113.47 3116.20 3118.98  
 3120.30 3121.39 3126.69 3129.28 3129.46 3131.08  
 3132.62 3132.78 3147.21 3147.94 3150.81 3153.03  
 3153.34 3159.47 3170.62 3172.30 3173.39 3173.61  
 3178.99 3183.04 3184.09 3189.36 3190.94 3191.69  
 3198.24 3198.56 3200.54 3202.63 3203.12 3208.11  
 3208.88 3211.27 3213.65 3220.67 3240.21 3246.42

**8-TS**

-234.81 12.46 20.52 26.12 32.40 34.90  
 39.25 41.36 45.78 48.15 53.14 58.15  
 59.01 65.47 67.98 75.76 79.81 88.63  
 93.33 102.92 105.12 117.11 120.38 124.56  
 134.69 145.54 148.58 164.40 167.63 170.81  
 184.65 206.06 210.54 210.70 224.33 225.67  
 232.77 236.64 240.79 243.97 253.54 259.33  
 259.67 263.92 270.02 274.29 277.01 290.75  
 300.51 307.89 312.02 312.48 325.48 328.75  
 330.20 340.62 345.49 355.96 369.92 382.45  
 385.85 389.75 400.12 405.28 408.49 413.70  
 418.93 427.93 429.13 431.73 446.34 459.38  
 465.42 471.95 495.99 505.28 519.67 524.22  
 525.01 525.93 529.65 535.33 543.45 586.19  
 587.74 591.58 618.85 628.58 631.42 633.62  
 644.07 658.99 663.63 674.78 677.31 693.50  
 705.11 708.01 710.22 711.33 717.02 717.61  
 757.63 759.82 764.80 769.78 773.05 781.94  
 789.78 815.98 855.15 860.64 861.55 864.60  
 867.74 874.03 881.72 884.79 885.92 935.30  
 939.08 940.53 943.48 945.35 946.09 949.26  
 955.22 957.68 960.49 966.63 976.92 977.83  
 981.27 985.51 988.06 996.68 1001.45 1003.17  
 1003.95 1007.35 1007.47 1010.09 1015.68 1017.67  
 1021.13 1021.81 1023.54 1031.03 1031.71 1033.27  
 1033.60 1049.55 1053.87 1054.28 1054.73 1070.55  
 1094.95 1099.43 1101.57 1106.27 1112.89 1114.27  
 1116.40 1119.16 1120.60 1121.68 1123.53 1128.40

1145.53 1180.61 1187.13 1187.68 1190.76 1192.08  
 1194.93 1197.59 1198.70 1199.28 1224.32 1230.46  
 1233.58 1240.79 1247.75 1250.77 1257.22 1260.11  
 1269.06 1269.19 1288.06 1299.24 1305.04 1305.80  
 1309.07 1317.45 1324.00 1330.06 1335.30 1356.57  
 1364.01 1370.89 1373.21 1379.21 1395.16 1398.62  
 1412.79 1415.35 1416.54 1418.42 1426.45 1428.23  
 1436.34 1437.60 1439.01 1473.46 1477.42 1479.80  
 1484.92 1486.57 1493.15 1493.55 1495.04 1496.50  
 1498.98 1499.87 1501.87 1503.67 1509.37 1516.15  
 1518.32 1519.83 1520.43 1523.00 1524.16 1527.41  
 1527.75 1529.10 1530.46 1537.70 1542.27 1543.12  
 1627.14 1629.80 1630.59 1631.89 1647.22 1647.73  
 1649.14 1661.39 1711.48 2983.59 3007.78 3046.41  
 3046.88 3048.85 3049.79 3051.68 3051.97 3055.84  
 3056.31 3075.09 3110.16 3113.42 3114.09 3119.18  
 3119.86 3120.53 3123.47 3126.62 3128.97 3130.18  
 3130.90 3132.70 3149.14 3149.36 3150.55 3161.98  
 3163.47 3170.55 3171.10 3173.62 3175.00 3178.78  
 3184.70 3184.88 3188.71 3190.53 3193.04 3196.47  
 3197.95 3200.66 3205.07 3206.97 3207.23 3213.22  
 3214.52 3225.23 3227.38 3244.81 3250.64 3282.40

**8'-TS**

-104.13 15.19 17.50 31.64 33.33 35.78  
 42.31 44.78 47.10 55.28 55.79 61.82  
 65.90 68.05 70.90 77.42 81.25 89.99  
 97.24 100.85 103.81 112.56 117.72 134.57  
 136.83 140.41 152.26 157.63 165.21 177.41  
 188.66 201.46 212.61 217.04 225.32 231.43  
 232.04 236.72 240.94 245.98 254.32 255.58  
 259.68 262.27 266.75 274.48 279.19 287.59  
 301.06 305.79 309.16 319.24 328.15 332.16  
 342.63 347.42 351.18 374.61 382.39 385.45  
 387.30 401.67 407.85 409.23 411.80 416.24  
 420.91 426.36 436.16 443.09 450.65 458.81  
 462.75 472.06 484.85 504.92 510.24 521.90  
 524.39 527.95 532.95 542.16 567.83 586.89  
 587.58 599.57 628.08 631.61 632.77 634.01  
 650.53 658.70 665.93 672.47 676.30 698.55  
 706.41 708.93 711.74 714.22 715.30 717.66  
 743.39 762.68 765.95 770.47 773.37 780.18  
 800.32 850.24 859.11 861.49 864.01 870.81  
 875.64 882.12 884.57 887.39 906.60 930.78  
 937.18 938.87 940.05 941.18 945.88 947.41  
 952.40 960.71 961.95 964.07 969.66 978.16  
 978.91 982.19 985.68 989.21 995.10 997.33  
 1001.33 1004.78 1010.02 1013.32 1016.16 1016.78  
 1018.00 1021.46 1023.63 1028.75 1030.46 1034.88  
 1041.83 1053.97 1054.12 1056.19 1057.42 1059.75  
 1101.67 1102.63 1107.85 1110.25 1113.81 1115.75  
 1116.48 1118.51 1118.64 1121.48 1123.33 1144.81  
 1167.71 1183.93 1188.16 1189.82 1192.47 1194.75  
 1197.48 1197.67 1199.22 1207.19 1224.94 1228.95  
 1230.99 1233.16 1241.01 1251.07 1257.37 1263.52  
 1266.55 1270.22 1289.62 1299.59 1302.36 1311.56  
 1323.37 1324.16 1328.95 1329.68 1334.60 1356.95

1365.04 1371.75 1373.58 1381.58 1390.33 1396.65  
 1413.13 1415.48 1416.70 1417.69 1427.39 1428.11  
 1436.25 1437.77 1437.96 1473.09 1477.40 1478.54  
 1482.28 1486.75 1487.21 1489.81 1494.07 1495.17  
 1497.38 1499.99 1503.02 1503.79 1514.86 1517.47  
 1519.13 1520.10 1520.19 1525.42 1526.18 1528.11  
 1530.12 1530.88 1532.77 1535.75 1542.91 1543.22  
 1626.01 1628.64 1631.27 1633.31 1646.07 1647.73  
 1648.32 1661.77 1732.31 3045.97 3046.65 3048.90  
 3049.18 3051.35 3052.61 3056.15 3056.29 3066.40  
 3076.23 3092.19 3109.96 3112.22 3116.69 3120.60  
 3121.04 3122.68 3124.91 3125.67 3128.08 3131.91  
 3132.52 3132.97 3135.26 3145.69 3149.85 3151.57  
 3155.40 3173.16 3173.22 3173.51 3174.28 3175.82  
 3183.12 3183.78 3183.98 3191.06 3194.50 3197.07  
 3198.06 3203.39 3203.49 3205.68 3206.57 3208.90  
 3211.66 3211.94 3218.38 3229.84 3245.32 3268.44

**1b-TS**

-140.56 18.99 24.02 25.96 32.07 35.41  
 42.78 46.66 47.35 51.52 57.19 60.51  
 62.31 69.10 75.51 77.20 93.03 103.12  
 113.21 114.41 120.30 125.92 136.46 143.49  
 146.97 159.72 175.40 197.29 212.49 218.61  
 225.23 233.95 236.79 244.07 253.01 259.23  
 263.74 271.19 277.90 304.76 319.10 335.70  
 354.32 366.06 384.29 391.68 392.10 404.17  
 408.61 409.38 415.85 417.41 428.60 432.78  
 446.03 455.20 463.27 498.96 513.07 523.99  
 527.28 553.72 574.25 586.82 630.50 630.74  
 631.34 633.90 635.78 660.17 665.85 672.27  
 702.48 703.85 708.69 710.97 711.79 713.04  
 717.31 718.27 755.43 763.25 764.67 766.73  
 767.64 769.33 786.11 853.10 858.94 863.04  
 869.13 870.81 878.64 891.54 893.54 938.64  
 940.02 941.43 943.84 948.67 967.67 968.69  
 971.33 981.38 983.63 987.53 989.59 999.54  
 1001.68 1003.92 1004.69 1010.94 1014.00 1015.86  
 1016.96 1017.57 1018.42 1020.65 1024.48 1026.43  
 1030.94 1048.37 1052.19 1052.93 1054.66 1055.60  
 1092.07 1095.45 1098.00 1099.26 1108.49 1109.56  
 1112.13 1117.03 1118.33 1119.29 1120.90 1125.24  
 1184.39 1186.94 1187.82 1196.26 1197.32 1198.12  
 1198.34 1225.07 1227.98 1233.31 1236.98 1248.46  
 1250.33 1255.15 1265.58 1304.71 1310.36 1327.85  
 1328.98 1329.36 1335.98 1365.89 1369.01 1375.59  
 1388.29 1391.05 1411.09 1415.57 1425.05 1435.33  
 1474.57 1476.27 1478.50 1486.15 1488.23 1492.81  
 1493.97 1498.59 1502.28 1519.61 1519.81 1520.88  
 1521.57 1523.33 1526.73 1527.82 1532.58 1542.28  
 1626.75 1628.36 1629.83 1630.73 1631.44 1645.75  
 1647.07 1647.84 1651.74 1655.54 2092.23 3045.85  
 3047.17 3052.47 3055.86 3114.77 3115.39 3124.99  
 3130.13 3138.64 3144.23 3146.12 3149.48 3170.70  
 3171.61 3172.76 3176.21 3181.79 3183.29 3184.43  
 3186.63 3190.82 3191.28 3193.68 3196.87 3197.30  
 3198.85 3201.50 3203.02 3206.80 3207.44 3211.27

3212.10 3214.66 3218.38 3219.52 3224.96 3230.63

**1c**

24.77 25.55 27.90 38.20 39.89 45.88  
 49.99 55.54 59.73 64.42 67.95 72.45  
 73.60 82.50 89.80 96.96 107.59 110.42  
 120.13 123.61 142.00 147.23 162.46 174.06  
 178.76 188.93 207.68 211.23 224.16 229.39  
 230.01 233.33 245.08 248.42 256.18 262.86  
 265.47 275.80 279.31 298.99 305.64 323.73  
 327.38 335.60 369.19 381.94 384.19 403.10  
 409.36 413.25 416.44 423.40 424.88 435.85  
 450.33 458.41 471.62 499.44 511.27 525.50  
 526.53 535.63 544.10 575.65 586.01 608.58  
 630.57 632.06 632.46 645.58 650.38 665.17  
 677.12 693.45 696.85 704.16 708.08 709.91  
 714.12 717.26 719.50 723.00 764.65 767.61  
 768.42 774.07 801.18 843.48 864.70 873.08  
 873.72 878.15 884.30 909.71 939.02 939.96  
 945.72 947.31 948.50 949.44 951.12 955.98  
 964.18 970.25 982.38 984.26 992.16 995.64  
 996.28 998.28 1003.72 1011.49 1012.98 1015.15  
 1015.91 1016.12 1024.02 1025.11 1032.64 1033.51  
 1037.34 1052.48 1053.79 1054.40 1057.33 1096.24  
 1099.09 1109.71 1113.70 1115.28 1117.10 1117.88  
 1119.71 1122.03 1133.59 1155.31 1158.85 1188.20  
 1188.55 1193.08 1196.05 1198.18 1198.87 1214.70  
 1227.48 1230.89 1232.24 1244.72 1260.80 1270.96  
 1273.01 1297.27 1307.12 1309.91 1310.82 1325.80  
 1330.54 1335.66 1367.77 1369.62 1372.26 1373.78  
 1397.06 1411.01 1417.39 1420.27 1430.15 1439.97  
 1472.45 1476.38 1478.67 1481.51 1485.77 1491.09  
 1493.59 1497.17 1501.40 1503.32 1516.76 1520.47  
 1524.19 1526.67 1528.89 1529.90 1531.21 1540.58  
 1567.58 1624.75 1627.13 1629.64 1630.69 1644.64  
 1645.87 1647.26 1660.69 1661.86 2831.62 3037.55  
 3049.76 3052.84 3054.85 3060.28 3121.73 3122.93  
 3131.84 3134.37 3135.02 3146.96 3148.09 3151.04  
 3152.54 3169.41 3175.10 3175.51 3180.32 3181.94  
 3186.04 3188.76 3189.94 3190.13 3190.99 3196.99  
 3201.91 3203.76 3204.77 3209.30 3213.35 3215.05  
 3216.95 3219.13 3227.30 3234.50 3259.67 3290.14

**1d**

16.93 21.22 29.58 31.56 38.69 42.03  
 46.44 49.38 50.62 56.70 62.19 64.14  
 73.59 78.52 80.87 86.90 94.39 100.92  
 108.39 110.98 116.78 127.03 141.37 148.02  
 156.67 165.99 194.46 209.75 214.22 216.73  
 225.23 229.78 232.29 240.08 243.45 251.24  
 254.52 259.67 261.03 266.17 275.90 282.68  
 291.78 297.02 307.43 309.50 327.79 330.50  
 336.77 339.76 344.76 368.10 377.31 384.59  
 386.92 402.43 408.17 409.18 410.13 412.83  
 415.58 431.66 441.28 449.33 457.01 461.01  
 498.85 515.17 522.26 523.75 526.97 527.37

536.45 541.80 572.92 584.80 586.80 602.70  
628.80 629.33 630.04 631.92 664.82 674.32  
675.93 699.52 704.89 711.09 712.15 715.52  
719.14 722.10 754.64 763.39 766.37 768.26  
808.36 837.30 845.49 858.36 863.31 867.84  
869.04 873.36 874.42 891.27 908.28 933.67  
939.27 941.39 941.89 943.07 945.98 948.52  
949.32 952.03 971.65 972.35 975.76 982.50  
983.47 986.45 989.54 994.36 995.14 1003.25  
1004.95 1011.83 1012.70 1012.95 1013.98 1018.98  
1023.00 1023.85 1029.23 1033.66 1036.39 1050.39  
1052.63 1053.93 1097.09 1113.38 1115.41 1116.79  
1117.54 1121.30 1123.80 1127.61 1148.56 1149.54  
1168.54 1183.98 1192.78 1194.14 1197.63 1198.75  
1198.98 1205.09 1206.95 1224.71 1228.02 1231.42  
1247.03 1247.12 1270.96 1274.65 1278.28 1281.93  
1298.40 1308.33 1315.58 1326.90 1332.81 1333.93  
1367.38 1370.51 1371.88 1375.46 1384.53 1415.74  
1416.59 1418.07 1420.08 1423.39 1427.94 1430.20  
1437.62 1439.91 1456.68 1470.50 1475.36 1477.76  
1478.58 1486.42 1486.48 1492.74 1495.03 1497.41  
1497.57 1501.38 1503.28 1513.84 1516.60 1517.09  
1519.63 1523.20 1523.77 1526.37 1527.73 1528.77  
1529.40 1539.71 1543.19 1579.05 1625.00 1629.96  
1631.30 1644.89 1647.59 1648.41 1711.96 2002.69  
3003.11 3048.12 3048.90 3050.43 3052.18 3052.88  
3055.03 3056.43 3066.00 3071.46 3120.02 3120.48  
3120.53 3121.66 3127.90 3128.62 3131.14 3132.84  
3133.29 3136.29 3141.58 3148.34 3150.29 3150.55  
3154.16 3166.54 3172.79 3174.23 3174.36 3181.97  
3185.25 3185.56 3186.72 3192.46 3195.70 3196.08  
3200.30 3203.12 3203.92 3206.23 3208.03 3209.42  
3228.74 3231.35 3243.71

**1d-TS**

-74.83 17.51 23.70 28.32 32.32 38.05  
46.47 48.24 56.49 58.38 62.79 66.90  
72.34 75.97 84.36 90.33 97.31 110.18  
118.19 120.79 146.23 155.81 160.88 170.65  
179.34 193.27 205.06 206.59 224.75 232.84  
234.43 238.21 246.64 249.71 255.96 260.20  
274.61 279.89 287.26 307.12 322.47 337.38  
342.42 374.93 385.29 401.80 405.78 407.27  
409.93 415.46 425.04 435.08 443.34 446.90  
448.35 456.63 468.03 510.93 515.55 528.09  
529.70 542.65 584.27 625.89 630.46 631.95  
633.85 641.30 659.34 661.90 664.35 671.74  
696.70 699.92 705.79 708.99 709.57 710.86  
715.49 718.79 720.44 758.23 763.93 770.56  
772.46 773.87 847.53 858.65 859.90 867.39  
873.73 879.69 890.94 897.76 917.06 933.42  
935.63 940.45 941.99 949.02 964.21 966.71  
976.02 977.61 979.45 983.78 993.11 993.92  
999.44 1001.26 1005.45 1006.11 1010.26 1014.27  
1015.56 1017.28 1018.58 1019.91 1026.69 1031.24  
1035.61 1046.05 1052.76 1053.90 1054.32 1055.22  
1073.63 1087.75 1096.83 1097.46 1103.59 1109.07

1114.15 1116.01 1119.02 1121.57 1122.35 1124.16  
1185.03 1186.09 1187.62 1195.44 1196.08 1196.63  
1197.38 1220.35 1222.23 1225.22 1232.16 1243.46  
1247.39 1260.30 1262.75 1297.51 1303.85 1319.89  
1329.98 1331.75 1334.09 1361.33 1365.02 1375.72  
1386.60 1396.40 1410.81 1413.92 1424.09 1434.37  
1471.69 1476.91 1479.95 1486.79 1490.33 1494.70  
1499.25 1499.68 1502.13 1519.44 1521.20 1522.77  
1524.37 1525.40 1525.56 1528.47 1530.33 1543.15  
1623.14 1624.27 1624.56 1628.38 1629.91 1645.82  
1645.95 1647.10 1655.18 1669.33 2087.01 3043.01  
3046.04 3049.16 3054.40 3108.11 3112.48 3119.79  
3122.63 3132.19 3143.45 3149.63 3170.97 3171.25  
3172.39 3172.79 3180.71 3181.67 3182.51 3186.65  
3190.76 3192.15 3194.87 3198.11 3199.50 3199.95  
3200.56 3204.27 3204.93 3206.91 3208.07 3213.68  
3217.42 3228.12 3231.27 3246.23 3256.89 3285.12

**3-TS**

-602.30 16.21 21.97 27.01 31.99 38.50  
41.54 46.08 54.21 58.93 60.21 63.22  
68.61 75.38 82.40 87.29 94.47 103.91  
112.82 125.84 127.18 132.98 141.52 148.85  
160.45 173.42 198.79 203.64 217.45 224.49  
227.95 228.42 242.18 251.32 261.08 272.80  
276.10 285.98 298.21 310.06 328.34 335.82  
341.12 349.96 379.74 390.21 392.47 409.52  
410.54 412.35 418.16 427.77 432.45 437.01  
444.37 459.38 469.46 507.59 518.63 526.31  
530.94 533.08 539.79 586.16 609.05 629.07  
630.58 631.58 632.49 636.70 648.36 665.13  
679.02 682.76 696.23 708.62 710.28 711.90  
712.22 713.27 717.84 747.20 762.37 763.66  
765.11 769.14 803.62 821.82 852.52 854.95  
867.43 869.82 873.92 876.43 891.12 892.02  
934.60 935.31 936.31 940.74 950.03 950.74  
963.54 966.16 973.26 978.63 984.72 987.53  
990.76 998.58 1000.25 1001.71 1004.51 1007.69  
1009.30 1013.90 1014.84 1021.47 1023.94 1027.07  
1032.26 1040.84 1051.33 1053.36 1053.62 1054.14  
1096.87 1098.23 1098.66 1110.26 1113.35 1114.71  
1115.72 1117.33 1121.14 1122.20 1144.65 1148.93  
1182.46 1183.84 1193.43 1196.70 1197.65 1198.23  
1203.23 1222.45 1228.38 1229.64 1249.89 1254.05  
1272.55 1302.16 1314.75 1320.58 1324.80 1328.26  
1333.85 1359.46 1364.35 1369.57 1372.49 1384.92  
1389.92 1413.72 1417.88 1420.04 1430.56 1433.19  
1440.41 1465.29 1473.29 1475.24 1478.26 1482.92  
1487.26 1489.69 1493.81 1498.75 1502.68 1518.05  
1520.83 1521.57 1525.03 1526.11 1529.05 1529.94  
1541.62 1624.96 1626.98 1629.00 1630.97 1644.90  
1645.61 1646.38 1649.34 1654.82 2031.24 3050.86  
3052.22 3057.55 3062.79 3124.50 3130.20 3130.91  
3133.13 3133.93 3138.21 3154.24 3168.75 3171.05  
3171.13 3172.50 3173.99 3179.31 3179.98 3180.26  
3186.15 3186.26 3187.12 3192.99 3195.76 3199.30  
3199.47 3199.64 3201.16 3201.75 3202.65 3204.87



3207.58 3210.19 3214.75 3215.64 3224.77 3242.15

**3'-TS**

-718.05 21.23 25.59 33.07 37.68 44.76  
49.31 50.53 56.24 57.94 66.72 69.16  
74.19 82.28 86.51 99.12 101.60 112.67  
115.81 126.78 136.79 142.02 146.33 156.97  
169.59 179.44 197.36 216.11 222.25 225.36  
237.15 240.83 245.43 251.98 258.51 280.90  
282.47 290.38 303.62 316.80 327.24 336.97  
344.56 359.30 380.55 387.01 395.08 408.75  
413.22 417.27 422.61 433.08 438.60 443.81  
452.32 456.57 478.22 508.97 524.82 526.69  
528.78 530.28 555.34 586.95 619.36 626.46  
630.58 630.94 633.52 634.70 652.99 665.06  
675.61 680.20 698.86 710.19 710.52 711.24  
712.47 714.56 715.91 729.95 761.81 762.41  
765.50 770.00 782.00 808.99 852.79 866.40  
869.11 870.98 872.60 890.49 902.42 934.94  
939.54 941.13 942.61 944.96 946.85 951.19  
961.74 974.51 975.74 984.00 984.20 985.03  
988.75 999.79 1000.49 1001.85 1005.56 1007.73  
1013.45 1014.34 1016.19 1017.68 1023.60 1028.44  
1033.51 1041.20 1052.31 1052.42 1053.46 1053.67  
1092.81 1097.99 1099.56 1110.63 1113.27 1113.85  
1115.62 1116.80 1119.12 1120.92 1146.73 1151.14  
1180.16 1185.37 1190.42 1195.35 1195.98 1196.18  
1197.11 1222.25 1225.08 1226.49 1250.35 1254.75  
1274.18 1303.61 1310.54 1323.77 1324.64 1328.70  
1334.26 1348.85 1362.82 1365.73 1369.96 1379.94  
1390.09 1402.87 1417.95 1420.87 1428.97 1431.24  
1441.06 1446.40 1472.97 1475.65 1478.05 1486.70  
1489.02 1489.84 1493.91 1498.55 1502.60 1518.45  
1521.42 1522.12 1524.00 1525.44 1527.36 1528.26  
1541.35 1626.23 1628.21 1629.01 1629.98 1644.64  
1645.80 1647.41 1653.22 1656.51 1790.79 3049.96  
3053.81 3055.24 3060.42 3119.99 3123.51 3129.36  
3134.90 3136.48 3147.11 3150.15 3163.29 3168.74  
3169.35 3172.27 3172.55 3174.39 3183.55 3185.07  
3185.27 3185.85 3194.72 3195.41 3195.67 3196.40  
3200.95 3202.06 3203.13 3206.29 3208.11 3210.46  
3216.23 3216.55 3217.78 3227.97 3236.86 3259.54

**5-Py**

10.12 16.55 27.82 33.63 37.02 43.31  
46.06 50.61 54.88 60.92 64.60 68.99  
78.55 84.61 88.53 92.59 109.85 113.94  
121.08 128.84 137.55 149.18 165.45 171.40  
204.03 206.50 212.20 224.01 226.54 236.62  
241.54 246.42 254.15 255.33 260.03 265.87  
274.03 278.00 288.76 308.85 326.49 332.61  
340.46 353.72 378.67 389.21 399.56 409.27  
411.95 414.95 419.65 434.80 440.99 453.27  
466.89 471.23 486.94 507.68 525.30 525.72  
532.93 545.21 552.18 585.03 599.29 624.35  
628.18 631.57 633.12 644.40 663.95 668.77

672.13 695.96 704.28 707.73 711.91 713.11  
717.21 719.83 735.45 761.71 765.46 769.94  
770.79 800.51 859.54 863.95 869.02 870.26  
872.47 874.58 879.33 912.02 931.82 940.04  
940.65 944.59 948.39 950.39 951.38 968.39  
980.20 983.00 984.62 986.23 987.15 988.49  
991.12 1004.12 1005.72 1008.26 1008.44 1010.43  
1014.33 1016.43 1018.39 1024.16 1031.74 1038.40  
1046.39 1051.43 1054.86 1055.11 1055.45 1083.87  
1098.19 1099.58 1114.55 1114.68 1117.69 1118.82  
1121.36 1123.32 1146.57 1165.17 1185.57 1187.05  
1192.97 1198.59 1198.98 1199.82 1206.90 1228.58  
1228.74 1231.01 1246.63 1250.73 1266.40 1270.97  
1300.84 1307.18 1313.16 1322.96 1331.86 1334.34  
1359.69 1369.76 1370.59 1372.07 1379.29 1383.63  
1414.88 1417.65 1419.46 1428.23 1437.42 1442.91  
1473.80 1476.22 1479.63 1482.84 1486.49 1489.09  
1493.31 1498.68 1501.16 1518.11 1518.31 1521.33  
1524.34 1525.33 1528.28 1529.42 1530.49 1540.13  
1543.59 1626.77 1629.53 1631.35 1631.68 1647.14  
1647.57 1648.91 1657.21 1713.89 2995.57 3008.23  
3047.32 3049.84 3052.43 3056.30 3120.62 3121.95  
3127.42 3129.27 3131.52 3131.93 3147.90 3149.48  
3158.58 3172.49 3172.67 3173.08 3180.10 3181.87  
3184.02 3186.52 3189.96 3190.08 3192.67 3194.79  
3199.96 3200.73 3202.47 3203.61 3207.57 3208.85  
3210.39 3211.47 3214.15 3222.05 3235.90 3239.45

**5'-Py**

5.84 14.12 27.98 33.89 37.54 40.98  
45.53 51.08 55.27 59.24 65.04 71.24  
82.98 85.21 87.40 95.59 112.59 113.63  
116.75 127.49 135.75 149.14 164.87 191.79  
204.17 207.70 215.13 222.16 229.73 240.38  
241.72 246.22 252.06 254.98 259.92 275.11  
278.04 280.41 294.17 311.64 322.64 332.33  
344.28 378.38 384.56 399.36 405.88 409.90  
412.15 416.64 419.04 437.05 448.74 449.80  
464.79 472.59 474.06 507.84 524.26 525.56  
532.93 542.17 555.48 585.74 609.56 623.78  
628.04 631.70 633.06 646.26 661.51 667.64  
671.02 695.90 707.50 708.10 711.90 713.00  
717.22 719.83 742.19 761.77 765.19 769.91  
770.05 809.73 858.96 860.94 868.76 869.75  
872.00 873.94 882.63 888.16 932.71 939.66  
941.14 944.79 948.76 949.58 956.34 961.83  
968.13 979.44 981.14 983.87 986.05 987.98  
989.68 990.94 1003.88 1006.73 1007.57 1009.37  
1010.40 1014.55 1016.41 1024.14 1032.14 1041.42  
1051.26 1052.15 1054.84 1055.25 1055.97 1098.34  
1098.84 1101.26 1114.13 1114.60 1117.58 1118.96  
1121.05 1123.01 1146.71 1163.11 1185.36 1187.13  
1192.46 1198.52 1198.86 1199.93 1211.77 1227.93  
1228.51 1230.63 1244.16 1245.80 1249.91 1270.90  
1300.29 1313.91 1323.71 1328.15 1331.84 1334.75  
1353.04 1369.53 1369.87 1371.96 1378.83 1382.74  
1393.76 1415.47 1418.42 1428.52 1437.87 1442.77

1473.99 1476.12 1479.56 1485.30 1486.18 1490.52  
1493.69 1497.77 1499.22 1501.84 1518.00 1519.49  
1522.52 1524.30 1528.18 1529.21 1530.37 1539.11  
1543.25 1627.27 1629.80 1631.48 1632.66 1647.16  
1647.84 1649.04 1659.70 1742.39 2978.66 3005.60  
3048.98 3052.19 3054.24 3058.37 3122.23 3124.30  
3129.26 3131.53 3133.54 3134.74 3148.35 3153.19  
3173.67 3173.84 3174.17 3181.16 3183.96 3184.85  
3186.09 3190.42 3190.92 3191.78 3192.08 3195.36  
3201.38 3202.57 3203.28 3207.25 3208.24 3209.65  
3213.61 3214.44 3216.83 3220.72 3226.72 3243.43

## VII-10. Energy components of DFT-optimized structures

**Table S2.** Computed Energy Components for Optimized Structures

| Components   | E(SCF) (eV)           | ZPE (kcal/mol)          | S(gas) (cal/mol·K)      | Gsolv (kcal/mol)        |
|--------------|-----------------------|-------------------------|-------------------------|-------------------------|
|              | B3LYP-D3 /cc-pVTZ(-f) | B3LYP-D3 /LACVP/6-31G** | B3LYP-D3 /LACVP/6-31G** | B3LYP-D3 /LACVP/6-31G** |
| Pyridine     | -6758.45              | 55.804                  | 67.27                   | -2.5                    |
| HBpin        | -11211.934            | 120.078                 | 90.98                   | -2.27                   |
| <b>A</b>     | -17971.105            | 178.464                 | 119.06                  | -2.73                   |
| <b>B</b>     | -17971.231            | 178.519                 | 118.90                  | -2.54                   |
| <b>G</b>     | -29184.231            | 301.690                 | 169.11                  | -4.46                   |
| <b>R</b>     | -29184.346            | 301.942                 | 166.41                  | -3.47                   |
| <b>1</b>     | -57231.52             | 288.488                 | 203.46                  | -10.22                  |
| <b>1-TS</b>  | -61685.037            | 350.412                 | 222.694                 | -7.28                   |
| <b>1a</b>    | -61685.096            | 351.048                 | 227.708                 | -7.91                   |
| <b>1b</b>    | -68444.33             | 408.063                 | 252.097                 | -7.96                   |
| <b>2</b>     | -68443.771            | 409.191                 | 248.88                  | -8.36                   |
| <b>[Py]</b>  | -6758.402             |                         |                         |                         |
| <b>[Cat]</b> | -61683.709            |                         |                         |                         |
| <b>2-TS</b>  | -68443.673            | 408.193                 | 239.203                 | -7.44                   |
| <b>3</b>     | -68444.007            | 409.283                 | 243.822                 | -8.66                   |
| <b>4</b>     | -61684.776            | 352.196                 | 216.772                 | -10.04                  |
| <b>4-TS</b>  | -61684.148            | 350.525                 | 221.801                 | -9.3                    |
| <b>4'</b>    | -61684.763            | 351.789                 | 224.648                 | -7.43                   |
| <b>4'-TS</b> | -61684.131            | 350.493                 | 222.429                 | -7.72                   |
| <b>5</b>     | -61685.218            | 353.573                 | 222.943                 | -7.24                   |
| <b>5'</b>    | -61684.885            | 353.763                 | 221.416                 | -6.96                   |
| <b>5-TS</b>  | -72897.44             | 473.177                 | 263.14                  | -7.52                   |
| <b>6</b>     | -72897.63             | 473.998                 | 268.38                  | -7.85                   |

|                             |            |         |         |       |
|-----------------------------|------------|---------|---------|-------|
| <b>6-TS</b>                 | -72897.23  | 472.845 | 265.59  | -8.37 |
| <b>6'-TS</b>                | -72897.161 | 472.954 | 264.67  | -7.01 |
| <b>7</b>                    | -72898.146 | 476.633 | 263.16  | -7.41 |
| <b>7'</b>                   | -72897.636 | 476.004 | 263.48  | -7.15 |
| <b>8</b>                    | -79657.003 | 533.363 | 294.70  | -9.26 |
| <b>8'</b>                   | -79656.975 | 533.679 | 293.28  | -9.37 |
| <b>8<sub>sub-opt</sub></b>  | -17987.038 |         |         |       |
| <b>8'<sub>sub-opt</sub></b> | -17986.211 |         |         |       |
| <b>8<sub>cat-opt</sub></b>  | -61662.657 |         |         |       |
| <b>8<sub>cat</sub></b>      | -61661.775 |         |         |       |
| <b>8'<sub>cat</sub></b>     | -61661.744 |         |         |       |
| <b>8<sub>sub</sub></b>      | -17986.733 |         |         |       |
| <b>8'<sub>sub</sub></b>     | -17986.114 |         |         |       |
| <b>8-TS</b>                 | -79656.392 | 533.188 | 287.21  | -8.47 |
| <b>8'-TS</b>                | -79656.371 | 533.825 | 284.40  | -8.70 |
| <b>1b-TS</b>                | -68443.458 | 407.624 | 248.257 | -8.79 |
| <b>1c</b>                   | -68443.189 | 409.715 | 245.306 | -6.86 |
| <b>1d</b>                   | -72897.643 | 473.889 | 267.059 | -6.54 |
| <b>1d-TS</b>                | -68443.771 | 408.663 | 241.785 | -8.32 |
| <b>3-TS</b>                 | -68443.135 | 407.312 | 245.70  | -9.39 |
| <b>3'-TS</b>                | -68443.347 | 407.498 | 240.52  | -8.06 |
| <b>5-Py</b>                 | -68444.308 | 411.009 | 247.014 | -9    |
| <b>5'-Py</b>                | -68444.468 | 411.138 | 238.693 | -8.9  |

## VIII. References

- S1. (a) S. Joung, D. G. Jo, V. D. Cao, H. Kim, C. Kim and S. Yun, Utilization of borane-catalyzed hydrosilylation as a dearomatizing tool: Six-membered cyclic amidine synthesis from isoquinolines and pyridines, *Synthesis*, 2020, **53**, 754–764; (b) V. D. Cao, S. H. Mun, S. H. Kim, G. U. Kim, H. G. Kim and S. Joung, Synthesis of cyclic amidines from quinolines by a borane-catalyzed dearomatization strategy, *Org. Lett.*, 2020, **22**, 515–519.
- S2. E. Tomás-Mendivil, R. García-Álvarez, C. Vidal, P. Crochet and V. Cadierno, Exploring rhodium(I) complexes [RhCl(COD)(PR<sub>3</sub>)] (COD = 1,5-Cyclooctadiene) as catalysts for nitrile hydration reactions in water: The aminophosphines make the difference, *ACS Catal.*, 2014, **4**, 1901–1910.
- S3. (a) K. Burgess, W. A. Van der Donk, S. A. Westcott, T. B. Marder, R. T. Baker and J. C. Calabrese, Reactions of catecholborane with Wilkinson's catalyst: Implications for transition metal-catalyzed hydroborations of alkenes, *J. Am. Chem. Soc.*, 1992, **114**, 9350–9359; (b) C. B. Fritsch, S. M. Wernitz, C. M. Vogels, M. P. Shaver, A. Decken, A. Bell and S. A. Westcott, 4,4,5,5-Tetraphenyl-1,3,2-dioxaborolane: A bulky borane for the transition metal catalysed hydroboration of alkenes, *Eur. J. Inorg. Chem.*, 2008, **2008**, 779–785.
- S4. J. E. Perea-Buceta, I. Fernández, S. Heikkinen, K. Axenov, A. W. T. King, T. Niemi, M. Nieger, M. Leskelä and T. Repo, Diverting hydrogenations with Wilkinson's catalyst towards highly reactive rhodium(I) species, *Angew. Chem., Int. Ed.*, 2015, **54**, 14321–14325.
- S5. R. G. Parr, Density functional theory of atoms and molecules, *Horizons of Quantum Chemistry*, 1980, 5–15.
- S6. A. D. Bochevarov, E. Harder, T. F. Hughes, J. R. Greenwood, D. A. Braden, D. M. Philipp, D. Rinaldo, M. D. Halls, J. Zhang and R. A. Friesner, Jaguar: A high-performance quantum chemistry software program with strengths in life and materials sciences, *Int. J. Quantum Chem.*, 2013, **113**, 2110–2142.
- S7. (a) J. C. Slater and J. C. Phillips, Quantum theory of molecules and solids Vol. 4: The self-consistent field for molecules and solids, *Physics Today*, 1974, **27**, 49–50; (b) S. H. Vosko, L. Wilk and M. Nusair, Accurate spin-dependent electron liquid correlation energies for local spin density calculations: a critical analysis, *Can. J. Phys.*, 1980, **59**, 1200; (c) A. D. Becke, Density-functional exchange-energy approximation with correct asymptotic behavior, *Phys. Rev. A Gen. Phys.*, 1988, **38**, 3098–3100; (d) C. Lee, W. Yang and R. G. Parr, Development of the Colle-Salvetti correlation-energy formula into a functional of the electron density, *Phys. Rev. B*, 1988, **37**, 785–789; (e) A. D. Becke, Density-functional thermochemistry. III. The role of exact exchange, *J. Chem. Phys.*, 1993, **98**, 5648–5652; (f) S. Grimme, J. Antony, S. Ehrlich and H. Krieg, A consistent and accurate ab initio parametrization of density functional dispersion correction (DFT-D) for the 94 elements H–Pu, *J. Chem. Phys.*, 2010, **132**, 154104.
- S8. T. H. Dunning, Gaussian basis sets for use in correlated molecular calculations. I. The atoms boron through neon and hydrogen, *J. Chem. Phys.*, 1989, **90**, 1007–1023.
- S9. (a) B. Marten, K. Kim, C. Cortis, R. A. Friesner, R. B. Murphy, M. N. Ringnalda, D. Sitkoff and B. Honig, New model for calculation of solvation free energies: Correction of self-consistent reaction field continuum dielectric theory for short-range hydrogen-bonding effects, *J. Phys. Chem.*, 1996, **100**, 11775–11788. (b) M. Friedrichs, R. Zhou, S. R. Edinger and R. A. Friesner, Poisson–Boltzmann analytical gradients for molecular modeling calculations, *J. Phys. Chem. B*, 1999, **103**, 3057–3061; (c) S. R. Edinger, C. Cortis, P. S. Shenkin and R. A. Friesner, Solvation free energies of peptides: Comparison of approximate continuum solvation models with accurate solution of the Poisson–Boltzmann equation, *J. Phys. Chem. B*, 1997, **101**, 1190–1197.

- S10. A. A. Rashin and B. Honig, Reevaluation of the Born Model of Ion Hydration, *J. Phys. Chem.*, 1985, **89**, 5588–5593.
- S11. K. Oshima, T. Ohmura and M. Suginome, Regioselective synthesis of 1,2-dihydropyridines by rhodium-catalyzed hydroboration of pyridines, *J. Am. Chem. Soc.*, 2012, **134**, 3699–3702.
- S12. A. Ariafard, E. S. Tabatabaie, A. T. Monfared, S. H. A. Assar, C. J. T. Hyland and B. F. Yates, Theoretical investigation into the palladium-catalyzed silaboration of pyridines, *Organometallics*, 2012, **31**, 1680–1687.
- S13. (a) K. Morokuma, Molecular orbital studies of hydrogen bonds. III. C=O···H–O Hydrogen Bond in H<sub>2</sub>CO···H<sub>2</sub>O and H<sub>2</sub>CO···2H<sub>2</sub>O, *J. Chem. Phys.*, 1971, **55**, 1236–1244; (b) F. M. Bickelhaupt, and K. N. Houk, Analyzing reaction rates with the distortion/interaction-activation strain model, *Angew. Chem., Int. Ed.*, 2017, **56**, 10070–10086.

# X. Appendix I

## X-Ray crystallographic data for G' and R'

### Structural Analysis of G' and R'

The data collection for X-ray single crystal structure analysis was performed at room temperature on a Bruker D8 QUEST diffractometer equipped with I $\mu$ s 3.0 Mo x-ray tube ( $\lambda = 0.71073 \text{ \AA}$ ) and Photon II detector. The Parabar oil coated crystals were mounting on goniometer for diffraction experiment. The diffraction data were integrated, scaled, and reduced by using the Bruker APEX4 software. The crystal structures were solved by SHELX structure solution program and refined by full-matrix least-squares calculations with the SHELXL. The thermal ellipsoid of crystal structure by ORTEP drawing is set at a 30% probability level. The single crystals of compounds for X-ray crystal structure analysis were obtained by a diffusion method in separate vials using dichloromethane and n-pentane as an eluent.

Crystallographic Data for **G'** (CCDC 2217742):

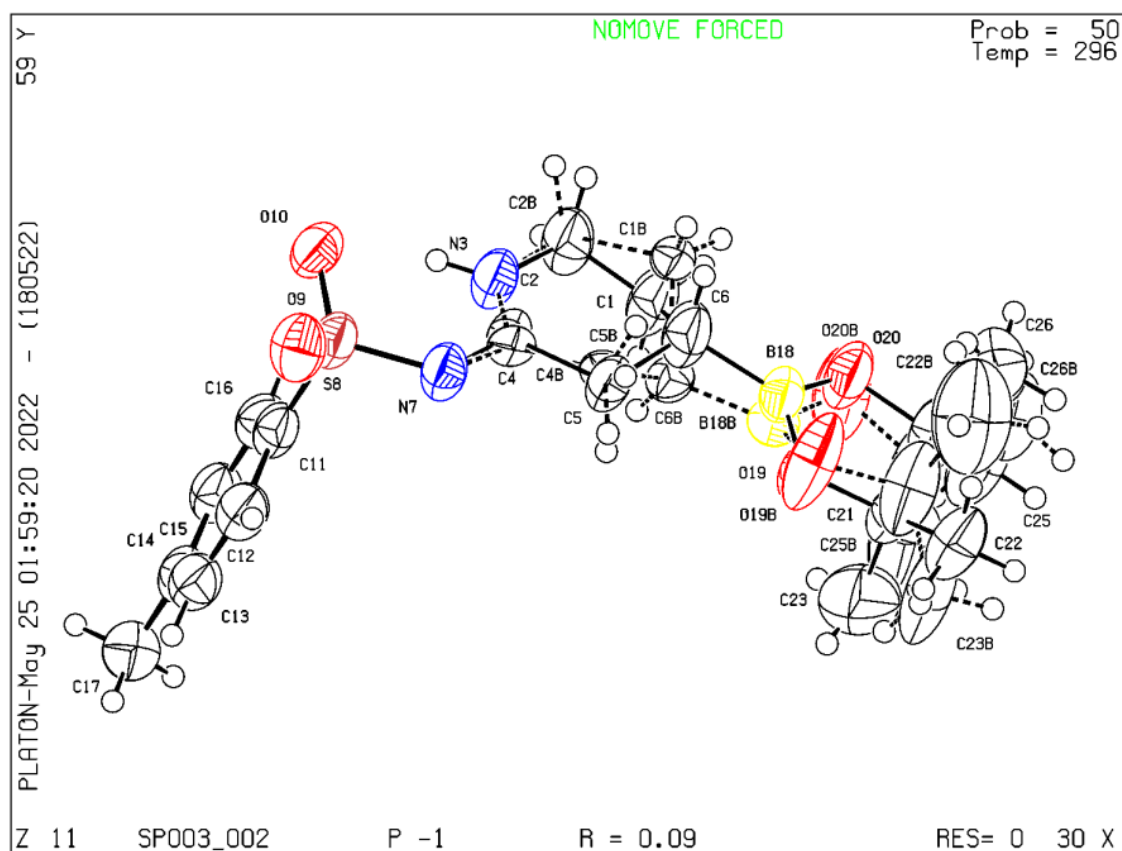

**Fig. S30** Molecular structure of complex **G'**

**Table S3.** Crystal data and structure refinement for **G'**.

|                        |                                                                   |                |
|------------------------|-------------------------------------------------------------------|----------------|
| Empirical formula      | C <sub>18</sub> H <sub>27</sub> B N <sub>2</sub> O <sub>4</sub> S |                |
| Formula weight         | 378.28                                                            |                |
| Temperature            | 296(2) K                                                          |                |
| Wavelength             | 0.71073 Å                                                         |                |
| Crystal system         | Triclinic                                                         |                |
| Space group            | <i>P</i> -1                                                       |                |
| Unit cell dimensions   | a = 6.4445(15) Å                                                  | α = 80.205(7)° |
|                        | b = 11.458(3) Å                                                   | β = 85.649(7)° |
|                        | c = 13.656(3) Å                                                   | γ = 82.844(7)° |
| Volume                 | 984.4(4) Å <sup>3</sup>                                           |                |
| Z                      | 2                                                                 |                |
| Density (calculated)   | 1.276 Mg/m <sup>3</sup>                                           |                |
| Absorption coefficient | 0.189 mm <sup>-1</sup>                                            |                |
| F(000)                 | 404                                                               |                |
| Crystal size           | 0.323 x 0.048 x 0.043 mm <sup>3</sup>                             |                |



|                                   |                                             |
|-----------------------------------|---------------------------------------------|
| Theta range for data collection   | 2.547 to 26.020°.                           |
| Index ranges                      | -7<=h<=7, -14<=k<=14, -16<=l<=16            |
| Reflections collected             | 32379                                       |
| Independent reflections           | 3803 [R(int) = 0.0677]                      |
| Completeness to theta = 25.242°   | 99.2 %                                      |
| Absorption correction             | Semi-empirical from equivalents             |
| Max. and min. transmission        | 0.7453 and 0.6733                           |
| Refinement method                 | Full-matrix least-squares on F <sup>2</sup> |
| Data / restraints / parameters    | 3803 / 217 / 363                            |
| Goodness-of-fit on F <sup>2</sup> | 1.022                                       |
| Final R indices [I>2sigma(I)]     | R1 = 0.0892, wR2 = 0.2382                   |
| R indices (all data)              | R1 = 0.1182, wR2 = 0.2708                   |
| Largest diff. peak and hole       | 0.775 and -0.325 e·Å <sup>-3</sup>          |

**Table S4.** Atomic coordinates ( x 10<sup>4</sup> ) and equivalent isotropic displacement parameters ( Å<sup>2</sup> x 10<sup>3</sup> ) for **G'**. U(eq) is defined as one third of the trace of the orthogonalized U<sup>ij</sup> tensor.

|       | x         | y        | z        | U(eq)  |
|-------|-----------|----------|----------|--------|
| N(3)  | 2295(5)   | 5648(3)  | 8592(2)  | 64(1)  |
| C(1)  | 2735(11)  | 7075(7)  | 7086(5)  | 77(2)  |
| C(2)  | 1650(20)  | 6832(12) | 8061(9)  | 80(5)  |
| C(4)  | 4000(20)  | 5020(9)  | 8438(9)  | 60(3)  |
| C(5)  | 5630(30)  | 5399(12) | 7556(9)  | 61(4)  |
| C(6)  | 4987(11)  | 6715(6)  | 7074(5)  | 75(2)  |
| B(18) | 6116(14)  | 7060(8)  | 6016(6)  | 62(3)  |
| O(19) | 7728(14)  | 6395(5)  | 5600(5)  | 95(3)  |
| O(20) | 5450(12)  | 8049(6)  | 5399(5)  | 85(2)  |
| C(21) | 8087(10)  | 6951(6)  | 4570(4)  | 70(2)  |
| C(22) | 10484(10) | 6918(8)  | 4343(5)  | 93(2)  |
| C(23) | 7114(18)  | 6219(10) | 3956(7)  | 145(4) |
| C(24) | 7006(11)  | 8197(6)  | 4576(5)  | 77(2)  |
| C(25) | 5842(14)  | 8760(11) | 3643(6)  | 126(3) |
| C(26) | 8357(14)  | 9084(7)  | 4821(7)  | 119(3) |
| C(1B) | 3510(30)  | 7432(14) | 7424(12) | 46(4)  |
| C(2B) | 1580(60)  | 6860(40) | 8130(20) | 52(11) |
| C(4B) | 4180(40)  | 4940(20) | 8380(30) | 34(7)  |

|        |          |          |          |         |
|--------|----------|----------|----------|---------|
| C(5B)  | 5320(80) | 5510(40) | 7610(30) | 45(7)   |
| C(6B)  | 4310(30) | 6369(15) | 6708(11) | 45(4)   |
| B(18B) | 5850(40) | 6830(30) | 5810(20) | 66(9)   |
| O(19B) | 7950(40) | 6520(30) | 5662(17) | 107(9)  |
| O(20B) | 5240(40) | 7890(30) | 5261(19) | 106(8)  |
| C(21B) | 8560(30) | 7230(20) | 4717(16) | 109(10) |
| C(22B) | 9940(50) | 8100(30) | 5050(30) | 175(12) |
| C(23B) | 9670(50) | 6450(30) | 4010(20) | 145(11) |
| C(24B) | 6550(30) | 7930(20) | 4359(16) | 108(10) |
| C(25B) | 5470(40) | 7450(30) | 3570(20) | 133(9)  |
| C(26B) | 6810(50) | 9220(20) | 3930(20) | 118(9)  |
| N(7)   | 4720(5)  | 3920(3)  | 8926(2)  | 60(1)   |
| S(8)   | 3411(1)  | 3249(1)  | 9853(1)  | 58(1)   |
| O(9)   | 4885(4)  | 2496(2)  | 10483(2) | 73(1)   |
| O(10)  | 1884(4)  | 4041(2)  | 10335(2) | 68(1)   |
| C(11)  | 2008(6)  | 2296(3)  | 9338(2)  | 55(1)   |
| C(12)  | 2949(6)  | 1158(3)  | 9241(3)  | 61(1)   |
| C(13)  | 1871(7)  | 388(3)   | 8861(3)  | 66(1)   |
| C(14)  | -177(6)  | 739(3)   | 8542(3)  | 62(1)   |
| C(15)  | -1061(6) | 1879(3)  | 8642(3)  | 65(1)   |
| C(16)  | -22(6)   | 2650(3)  | 9037(3)  | 61(1)   |
| C(17)  | -1331(8) | -92(4)   | 8122(3)  | 80(1)   |

**Table S5.** Bond lengths [Å] and angles [°] for **G<sup>+</sup>**.

|            |           |
|------------|-----------|
| N(3)-C(4)  | 1.263(10) |
| N(3)-C(4B) | 1.417(19) |
| N(3)-C(2)  | 1.453(13) |
| N(3)-C(2B) | 1.46(5)   |
| N(3)-H(3)  | 0.8600    |
| C(1)-C(2)  | 1.456(14) |
| C(1)-C(6)  | 1.458(9)  |
| C(1)-H(1A) | 0.9700    |
| C(1)-H(1B) | 0.9700    |
| C(2)-H(2A) | 0.9700    |
| C(2)-H(2B) | 0.9700    |
| C(4)-N(7)  | 1.364(9)  |

|              |           |
|--------------|-----------|
| C(4)-C(5)    | 1.577(18) |
| C(5)-C(6)    | 1.558(12) |
| C(5)-H(5A)   | 0.9700    |
| C(5)-H(5B)   | 0.9700    |
| C(6)-B(18)   | 1.578(8)  |
| C(6)-H(6)    | 0.9800    |
| B(18)-O(20)  | 1.336(7)  |
| B(18)-O(19)  | 1.357(8)  |
| O(19)-C(21)  | 1.456(7)  |
| O(20)-C(24)  | 1.450(6)  |
| C(21)-C(23)  | 1.500(8)  |
| C(21)-C(24)  | 1.510(9)  |
| C(21)-C(22)  | 1.549(8)  |
| C(22)-H(22A) | 0.9600    |
| C(22)-H(22B) | 0.9600    |
| C(22)-H(22C) | 0.9600    |
| C(23)-H(23A) | 0.9600    |
| C(23)-H(23B) | 0.9600    |
| C(23)-H(23C) | 0.9600    |
| C(24)-C(26)  | 1.511(9)  |
| C(24)-C(25)  | 1.533(9)  |
| C(25)-H(25A) | 0.9600    |
| C(25)-H(25B) | 0.9600    |
| C(25)-H(25C) | 0.9600    |
| C(26)-H(26A) | 0.9600    |
| C(26)-H(26B) | 0.9600    |
| C(26)-H(26C) | 0.9600    |
| C(1B)-C(2B)  | 1.65(4)   |
| C(1B)-C(6B)  | 1.70(2)   |
| C(1B)-H(1BA) | 0.9700    |
| C(1B)-H(1BB) | 0.9700    |
| C(2B)-H(2BA) | 0.9700    |
| C(2B)-H(2BB) | 0.9700    |
| C(4B)-N(7)   | 1.296(19) |
| C(4B)-C(5B)  | 1.36(6)   |
| C(5B)-C(6B)  | 1.56(2)   |
| C(5B)-H(5BA) | 0.9700    |

|               |           |
|---------------|-----------|
| C(5B)-H(5BB)  | 0.9700    |
| C(6B)-B(18B)  | 1.58(3)   |
| C(6B)-H(6B)   | 0.9800    |
| B(18B)-O(20B) | 1.343(17) |
| B(18B)-O(19B) | 1.368(18) |
| O(19B)-C(21B) | 1.463(16) |
| O(20B)-C(24B) | 1.440(16) |
| C(21B)-C(24B) | 1.501(17) |
| C(21B)-C(23B) | 1.509(12) |
| C(21B)-C(22B) | 1.553(14) |
| C(22B)-H(22D) | 0.9600    |
| C(22B)-H(22E) | 0.9600    |
| C(22B)-H(22F) | 0.9600    |
| C(23B)-H(23D) | 0.9600    |
| C(23B)-H(23E) | 0.9600    |
| C(23B)-H(23F) | 0.9600    |
| C(24B)-C(26B) | 1.524(14) |
| C(24B)-C(25B) | 1.538(14) |
| C(25B)-H(25D) | 0.9600    |
| C(25B)-H(25E) | 0.9600    |
| C(25B)-H(25F) | 0.9600    |
| C(26B)-H(26D) | 0.9600    |
| C(26B)-H(26E) | 0.9600    |
| C(26B)-H(26F) | 0.9600    |
| N(7)-S(8)     | 1.604(3)  |
| S(8)-O(9)     | 1.433(3)  |
| S(8)-O(10)    | 1.452(3)  |
| S(8)-C(11)    | 1.763(4)  |
| C(11)-C(12)   | 1.391(5)  |
| C(11)-C(16)   | 1.392(5)  |
| C(12)-C(13)   | 1.376(6)  |
| C(12)-H(12)   | 0.9300    |
| C(13)-C(14)   | 1.410(6)  |
| C(13)-H(13)   | 0.9300    |
| C(14)-C(15)   | 1.383(5)  |
| C(14)-C(17)   | 1.489(6)  |
| C(15)-C(16)   | 1.373(6)  |

|                   |           |
|-------------------|-----------|
| C(15)-H(15)       | 0.9300    |
| C(16)-H(16)       | 0.9300    |
| C(17)-H(17A)      | 0.9600    |
| C(17)-H(17B)      | 0.9600    |
| C(17)-H(17C)      | 0.9600    |
| C(4)-N(3)-C(2)    | 125.8(7)  |
| C(4B)-N(3)-C(2B)  | 128.2(19) |
| C(4)-N(3)-H(3)    | 117.1     |
| C(2)-N(3)-H(3)    | 117.1     |
| C(2)-C(1)-C(6)    | 114.5(7)  |
| C(2)-C(1)-H(1A)   | 108.6     |
| C(6)-C(1)-H(1A)   | 108.6     |
| C(2)-C(1)-H(1B)   | 108.6     |
| C(6)-C(1)-H(1B)   | 108.6     |
| H(1A)-C(1)-H(1B)  | 107.6     |
| N(3)-C(2)-C(1)    | 112.7(9)  |
| N(3)-C(2)-H(2A)   | 109.0     |
| C(1)-C(2)-H(2A)   | 109.0     |
| N(3)-C(2)-H(2B)   | 109.0     |
| C(1)-C(2)-H(2B)   | 109.0     |
| H(2A)-C(2)-H(2B)  | 107.8     |
| N(3)-C(4)-N(7)    | 128.5(8)  |
| N(3)-C(4)-C(5)    | 122.8(8)  |
| N(7)-C(4)-C(5)    | 108.7(8)  |
| C(6)-C(5)-C(4)    | 109.3(11) |
| C(6)-C(5)-H(5A)   | 109.8     |
| C(4)-C(5)-H(5A)   | 109.8     |
| C(6)-C(5)-H(5B)   | 109.8     |
| C(4)-C(5)-H(5B)   | 109.8     |
| H(5A)-C(5)-H(5B)  | 108.3     |
| C(1)-C(6)-C(5)    | 114.7(9)  |
| C(1)-C(6)-B(18)   | 112.8(6)  |
| C(5)-C(6)-B(18)   | 112.8(8)  |
| C(1)-C(6)-H(6)    | 105.1     |
| C(5)-C(6)-H(6)    | 105.1     |
| B(18)-C(6)-H(6)   | 105.1     |
| O(20)-B(18)-O(19) | 112.4(5)  |

|                     |          |
|---------------------|----------|
| O(20)-B(18)-C(6)    | 121.4(6) |
| O(19)-B(18)-C(6)    | 126.1(6) |
| B(18)-O(19)-C(21)   | 108.1(5) |
| B(18)-O(20)-C(24)   | 107.2(5) |
| O(19)-C(21)-C(23)   | 105.6(6) |
| O(19)-C(21)-C(24)   | 102.0(4) |
| C(23)-C(21)-C(24)   | 115.3(7) |
| O(19)-C(21)-C(22)   | 108.0(6) |
| C(23)-C(21)-C(22)   | 112.0(6) |
| C(24)-C(21)-C(22)   | 112.9(6) |
| C(21)-C(22)-H(22A)  | 109.5    |
| C(21)-C(22)-H(22B)  | 109.5    |
| H(22A)-C(22)-H(22B) | 109.5    |
| C(21)-C(22)-H(22C)  | 109.5    |
| H(22A)-C(22)-H(22C) | 109.5    |
| H(22B)-C(22)-H(22C) | 109.5    |
| C(21)-C(23)-H(23A)  | 109.5    |
| C(21)-C(23)-H(23B)  | 109.5    |
| H(23A)-C(23)-H(23B) | 109.5    |
| C(21)-C(23)-H(23C)  | 109.5    |
| H(23A)-C(23)-H(23C) | 109.5    |
| H(23B)-C(23)-H(23C) | 109.5    |
| O(20)-C(24)-C(21)   | 103.6(5) |
| O(20)-C(24)-C(26)   | 105.4(6) |
| C(21)-C(24)-C(26)   | 115.4(6) |
| O(20)-C(24)-C(25)   | 107.3(6) |
| C(21)-C(24)-C(25)   | 115.7(7) |
| C(26)-C(24)-C(25)   | 108.5(7) |
| C(24)-C(25)-H(25A)  | 109.5    |
| C(24)-C(25)-H(25B)  | 109.5    |
| H(25A)-C(25)-H(25B) | 109.5    |
| C(24)-C(25)-H(25C)  | 109.5    |
| H(25A)-C(25)-H(25C) | 109.5    |
| H(25B)-C(25)-H(25C) | 109.5    |
| C(24)-C(26)-H(26A)  | 109.5    |
| C(24)-C(26)-H(26B)  | 109.5    |
| H(26A)-C(26)-H(26B) | 109.5    |

|                      |           |
|----------------------|-----------|
| C(24)-C(26)-H(26C)   | 109.5     |
| H(26A)-C(26)-H(26C)  | 109.5     |
| H(26B)-C(26)-H(26C)  | 109.5     |
| C(2B)-C(1B)-C(6B)    | 102.2(17) |
| C(2B)-C(1B)-H(1BA)   | 111.3     |
| C(6B)-C(1B)-H(1BA)   | 111.3     |
| C(2B)-C(1B)-H(1BB)   | 111.3     |
| C(6B)-C(1B)-H(1BB)   | 111.3     |
| H(1BA)-C(1B)-H(1BB)  | 109.2     |
| N(3)-C(2B)-C(1B)     | 110(3)    |
| N(3)-C(2B)-H(2BA)    | 109.8     |
| C(1B)-C(2B)-H(2BA)   | 109.8     |
| N(3)-C(2B)-H(2BB)    | 109.8     |
| C(1B)-C(2B)-H(2BB)   | 109.8     |
| H(2BA)-C(2B)-H(2BB)  | 108.2     |
| N(7)-C(4B)-C(5B)     | 128(2)    |
| N(7)-C(4B)-N(3)      | 121(2)    |
| C(5B)-C(4B)-N(3)     | 111(2)    |
| C(4B)-C(5B)-C(6B)    | 123(4)    |
| C(4B)-C(5B)-H(5BA)   | 106.5     |
| C(6B)-C(5B)-H(5BA)   | 106.5     |
| C(4B)-C(5B)-H(5BB)   | 106.5     |
| C(6B)-C(5B)-H(5BB)   | 106.5     |
| H(5BA)-C(5B)-H(5BB)  | 106.5     |
| C(5B)-C(6B)-B(18B)   | 117(3)    |
| C(5B)-C(6B)-C(1B)    | 92(2)     |
| B(18B)-C(6B)-C(1B)   | 111.8(16) |
| C(5B)-C(6B)-H(6B)    | 111.7     |
| B(18B)-C(6B)-H(6B)   | 111.7     |
| C(1B)-C(6B)-H(6B)    | 111.7     |
| O(20B)-B(18B)-O(19B) | 111.1(18) |
| O(20B)-B(18B)-C(6B)  | 116.8(19) |
| O(19B)-B(18B)-C(6B)  | 129(2)    |
| B(18B)-O(19B)-C(21B) | 105.5(15) |
| B(18B)-O(20B)-C(24B) | 105.0(17) |
| O(19B)-C(21B)-C(24B) | 104.5(13) |
| O(19B)-C(21B)-C(23B) | 110.5(18) |

|                      |            |
|----------------------|------------|
| C(24B)-C(21B)-C(23B) | 114.6(19)  |
| O(19B)-C(21B)-C(22B) | 102.3(19)  |
| C(24B)-C(21B)-C(22B) | 109.0(18)  |
| C(23B)-C(21B)-C(22B) | 115(2)     |
| C(21B)-C(22B)-H(22D) | 109.5      |
| C(21B)-C(22B)-H(22E) | 109.5      |
| H(22D)-C(22B)-H(22E) | 109.5      |
| C(21B)-C(22B)-H(22F) | 109.5      |
| H(22D)-C(22B)-H(22F) | 109.5      |
| H(22E)-C(22B)-H(22F) | 109.5      |
| C(21B)-C(23B)-H(23D) | 109.5      |
| C(21B)-C(23B)-H(23E) | 109.5      |
| H(23D)-C(23B)-H(23E) | 109.5      |
| C(21B)-C(23B)-H(23F) | 109.5      |
| H(23D)-C(23B)-H(23F) | 109.5      |
| H(23E)-C(23B)-H(23F) | 109.5      |
| O(20B)-C(24B)-C(21B) | 102.4(14)  |
| O(20B)-C(24B)-C(26B) | 109.0(19)  |
| C(21B)-C(24B)-C(26B) | 112.3(18)  |
| O(20B)-C(24B)-C(25B) | 110.0(19)  |
| C(21B)-C(24B)-C(25B) | 117.1(18)  |
| C(26B)-C(24B)-C(25B) | 105.8(18)  |
| C(24B)-C(25B)-H(25D) | 109.5      |
| C(24B)-C(25B)-H(25E) | 109.5      |
| H(25D)-C(25B)-H(25E) | 109.5      |
| C(24B)-C(25B)-H(25F) | 109.5      |
| H(25D)-C(25B)-H(25F) | 109.5      |
| H(25E)-C(25B)-H(25F) | 109.5      |
| C(24B)-C(26B)-H(26D) | 109.5      |
| C(24B)-C(26B)-H(26E) | 109.5      |
| H(26D)-C(26B)-H(26E) | 109.5      |
| C(24B)-C(26B)-H(26F) | 109.5      |
| H(26D)-C(26B)-H(26F) | 109.5      |
| H(26E)-C(26B)-H(26F) | 109.5      |
| C(4B)-N(7)-S(8)      | 127.9(11)  |
| C(4)-N(7)-S(8)       | 121.9(5)   |
| O(9)-S(8)-O(10)      | 116.22(17) |



|                     |            |
|---------------------|------------|
| O(9)-S(8)-N(7)      | 107.41(17) |
| O(10)-S(8)-N(7)     | 113.70(16) |
| O(9)-S(8)-C(11)     | 106.55(17) |
| O(10)-S(8)-C(11)    | 107.21(17) |
| N(7)-S(8)-C(11)     | 104.94(16) |
| C(12)-C(11)-C(16)   | 119.3(4)   |
| C(12)-C(11)-S(8)    | 119.0(3)   |
| C(16)-C(11)-S(8)    | 121.6(3)   |
| C(13)-C(12)-C(11)   | 120.2(4)   |
| C(13)-C(12)-H(12)   | 119.9      |
| C(11)-C(12)-H(12)   | 119.9      |
| C(12)-C(13)-C(14)   | 121.1(3)   |
| C(12)-C(13)-H(13)   | 119.4      |
| C(14)-C(13)-H(13)   | 119.4      |
| C(15)-C(14)-C(13)   | 117.2(4)   |
| C(15)-C(14)-C(17)   | 121.8(4)   |
| C(13)-C(14)-C(17)   | 121.0(4)   |
| C(16)-C(15)-C(14)   | 122.4(4)   |
| C(16)-C(15)-H(15)   | 118.8      |
| C(14)-C(15)-H(15)   | 118.8      |
| C(15)-C(16)-C(11)   | 119.8(3)   |
| C(15)-C(16)-H(16)   | 120.1      |
| C(11)-C(16)-H(16)   | 120.1      |
| C(14)-C(17)-H(17A)  | 109.5      |
| C(14)-C(17)-H(17B)  | 109.5      |
| H(17A)-C(17)-H(17B) | 109.5      |
| C(14)-C(17)-H(17C)  | 109.5      |
| H(17A)-C(17)-H(17C) | 109.5      |
| H(17B)-C(17)-H(17C) | 109.5      |

---

Symmetry transformations used to generate equivalent atoms:

**Table S6.** Anisotropic displacement parameters (  $\text{\AA}^2 \times 10^3$  ) for  $\mathbf{G}^4$ . The anisotropic displacement factor exponent takes the form:  $-2\pi^2[ h^2 a^{*2} U^{11} + \dots + 2 h k a^* b^* U^{12} ]$

---

|          |          |          |          |          |          |
|----------|----------|----------|----------|----------|----------|
| $U^{11}$ | $U^{22}$ | $U^{33}$ | $U^{23}$ | $U^{13}$ | $U^{12}$ |
|----------|----------|----------|----------|----------|----------|

---

|        |         |         |         |         |         |         |
|--------|---------|---------|---------|---------|---------|---------|
| N(3)   | 62(2)   | 58(2)   | 60(2)   | 8(2)    | 18(2)   | 6(2)    |
| C(1)   | 77(4)   | 81(4)   | 57(3)   | 17(3)   | 10(3)   | 6(3)    |
| C(2)   | 79(7)   | 55(6)   | 85(8)   | 16(5)   | 22(5)   | 18(5)   |
| C(4)   | 67(7)   | 60(5)   | 47(4)   | -1(4)   | 14(4)   | -8(4)   |
| C(5)   | 61(7)   | 60(6)   | 52(4)   | 2(4)    | 17(4)   | 0(5)    |
| C(6)   | 81(4)   | 70(4)   | 60(3)   | 15(3)   | 12(3)   | 0(3)    |
| B(18)  | 73(4)   | 55(4)   | 53(4)   | 2(3)    | 14(3)   | -9(3)   |
| O(19)  | 116(6)  | 70(3)   | 80(4)   | 6(3)    | 42(3)   | 6(3)    |
| O(20)  | 99(5)   | 76(3)   | 62(3)   | 15(2)   | 30(3)   | 4(3)    |
| C(21)  | 80(4)   | 83(4)   | 47(3)   | -7(2)   | 12(3)   | -21(3)  |
| C(22)  | 76(4)   | 122(6)  | 70(4)   | 0(4)    | 19(3)   | -4(4)   |
| C(23)  | 179(9)  | 158(8)  | 118(6)  | -58(6)  | 6(6)    | -58(7)  |
| C(24)  | 75(4)   | 88(4)   | 57(3)   | 13(3)   | 17(3)   | -14(3)  |
| C(25)  | 110(6)  | 173(8)  | 69(4)   | 35(5)   | 8(4)    | 3(6)    |
| C(26)  | 132(6)  | 88(5)   | 134(6)  | -9(4)   | 34(5)   | -36(4)  |
| C(1B)  | 54(9)   | 39(7)   | 42(8)   | -6(5)   | 3(6)    | -2(6)   |
| C(2B)  | 57(16)  | 80(30)  | 27(11)  | -12(13) | 4(10)   | -20(14) |
| C(4B)  | 9(9)    | 42(12)  | 51(12)  | -16(8)  | 0(8)    | 8(8)    |
| C(5B)  | 31(11)  | 36(9)   | 68(13)  | -18(7)  | 9(9)    | 8(7)    |
| C(6B)  | 46(8)   | 54(8)   | 38(6)   | -10(6)  | -6(5)   | -9(6)   |
| B(18B) | 82(15)  | 49(12)  | 66(11)  | -16(8)  | 14(10)  | -9(10)  |
| O(19B) | 51(9)   | 176(18) | 66(11)  | 46(10)  | 3(7)    | 5(9)    |
| O(20B) | 46(9)   | 146(15) | 107(12) | 41(10)  | -9(7)   | -13(9)  |
| C(21B) | 68(11)  | 160(20) | 84(14)  | 32(12)  | 0(9)    | -19(10) |
| C(22B) | 112(17) | 200(20) | 190(20) | 37(17)  | -13(15) | -20(15) |
| C(23B) | 120(19) | 170(20) | 105(15) | 57(12)  | 47(13)  | 2(15)   |
| C(24B) | 78(14)  | 160(20) | 69(12)  | 30(12)  | 13(9)   | -5(12)  |
| C(25B) | 88(15)  | 180(20) | 126(15) | 16(14)  | -21(12) | -28(14) |
| C(26B) | 101(17) | 138(16) | 99(16)  | 25(12)  | 6(13)   | -24(12) |
| N(7)   | 55(2)   | 57(2)   | 61(2)   | 3(1)    | 14(1)   | -1(1)   |
| S(8)   | 60(1)   | 58(1)   | 48(1)   | 5(1)    | 7(1)    | -1(1)   |
| O(9)   | 73(2)   | 74(2)   | 62(2)   | 13(1)   | -12(1)  | -1(1)   |
| O(10)  | 75(2)   | 68(2)   | 56(1)   | -6(1)   | 18(1)   | -2(1)   |
| C(11)  | 57(2)   | 53(2)   | 46(2)   | 7(1)    | 7(2)    | 3(2)    |
| C(12)  | 61(2)   | 55(2)   | 57(2)   | 5(2)    | 2(2)    | 12(2)   |
| C(13)  | 74(3)   | 56(2)   | 60(2)   | 1(2)    | 7(2)    | 7(2)    |
| C(14)  | 67(2)   | 61(2)   | 52(2)   | 2(2)    | 13(2)   | -5(2)   |

|       |       |       |       |        |      |        |
|-------|-------|-------|-------|--------|------|--------|
| C(15) | 57(2) | 65(2) | 64(2) | 1(2)   | 6(2) | 2(2)   |
| C(16) | 59(2) | 58(2) | 59(2) | -2(2)  | 7(2) | 6(2)   |
| C(17) | 93(3) | 71(3) | 74(3) | -11(2) | 7(2) | -12(2) |

**Table S7.** Hydrogen coordinates (  $\times 10^4$  ) and isotropic displacement parameters (  $\text{\AA}^2 \times 10^3$  ) for **G'**.

|        | x     | y    | z    | U(eq) |
|--------|-------|------|------|-------|
| H(3)   | 1437  | 5348 | 9052 | 77    |
| H(1A)  | 2494  | 7923 | 6839 | 92    |
| H(1B)  | 2128  | 6664 | 6632 | 92    |
| H(2A)  | 1920  | 7420 | 8456 | 96    |
| H(2B)  | 154   | 6914 | 7980 | 96    |
| H(5A)  | 7023  | 5323 | 7804 | 73    |
| H(5B)  | 5667  | 4880 | 7061 | 73    |
| H(6)   | 5530  | 7201 | 7500 | 90    |
| H(22A) | 10759 | 7281 | 3666 | 139   |
| H(22B) | 11062 | 7348 | 4782 | 139   |
| H(22C) | 11116 | 6106 | 4440 | 139   |
| H(23A) | 7302  | 6545 | 3264 | 218   |
| H(23B) | 7771  | 5412 | 4071 | 218   |
| H(23C) | 5644  | 6231 | 4140 | 218   |
| H(25A) | 6830  | 8871 | 3082 | 189   |
| H(25B) | 4857  | 8245 | 3522 | 189   |
| H(25C) | 5109  | 9518 | 3740 | 189   |
| H(26A) | 9428  | 9221 | 4299 | 179   |
| H(26B) | 7506  | 9821 | 4879 | 179   |
| H(26C) | 8996  | 8774 | 5438 | 179   |
| H(1BA) | 4625  | 7554 | 7822 | 55    |
| H(1BB) | 3024  | 8184 | 7021 | 55    |
| H(2BA) | 1110  | 7343 | 8635 | 62    |
| H(2BB) | 408   | 6846 | 7723 | 62    |
| H(5BA) | 6241  | 4901 | 7329 | 54    |
| H(5BB) | 6212  | 5970 | 7896 | 54    |

|        |       |      |      |     |
|--------|-------|------|------|-----|
| H(6B)  | 3123  | 6051 | 6481 | 54  |
| H(22D) | 10432 | 8622 | 4481 | 263 |
| H(22E) | 9117  | 8561 | 5499 | 263 |
| H(22F) | 11110 | 7648 | 5387 | 263 |
| H(23D) | 10064 | 6930 | 3398 | 217 |
| H(23E) | 10908 | 6014 | 4307 | 217 |
| H(23F) | 8757  | 5895 | 3890 | 217 |
| H(25D) | 6358  | 7480 | 2967 | 199 |
| H(25E) | 5211  | 6643 | 3808 | 199 |
| H(25F) | 4166  | 7935 | 3428 | 199 |
| H(26D) | 7692  | 9255 | 3331 | 176 |
| H(26E) | 5467  | 9653 | 3792 | 176 |
| H(26F) | 7449  | 9573 | 4409 | 176 |
| H(12)  | 4310  | 917  | 9434 | 74  |
| H(13)  | 2503  | -377 | 8814 | 80  |
| H(15)  | -2409 | 2132 | 8435 | 78  |
| H(16)  | -672  | 3406 | 9103 | 73  |
| H(17A) | -464  | -835 | 8113 | 120 |
| H(17B) | -2590 | -229 | 8526 | 120 |
| H(17C) | -1683 | 252  | 7455 | 120 |

---

Crystallographic Data for **R'** (CCDC 2217744):

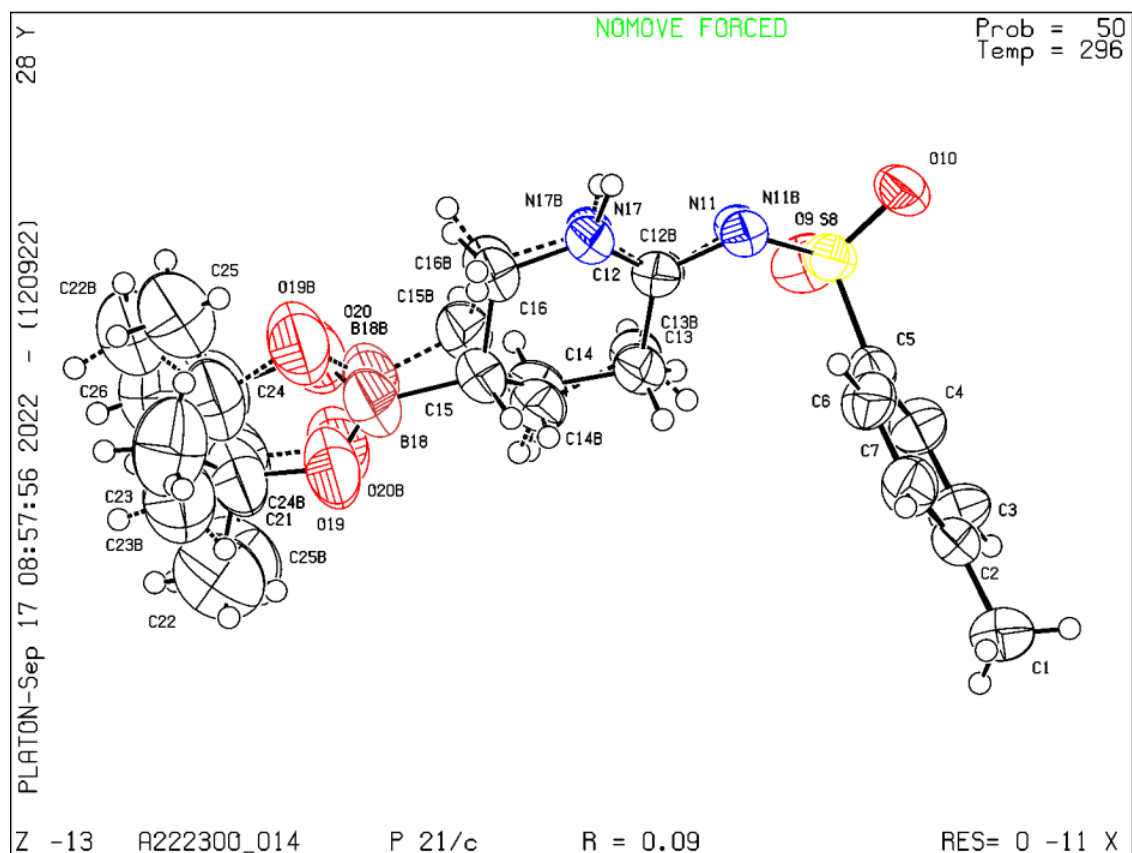

**Fig. S31** Molecular structure of complex **R'**

**Table S8.** Crystal data and structure refinement for **R'**

|                        |                                                                   |                |
|------------------------|-------------------------------------------------------------------|----------------|
| Empirical formula      | C <sub>18</sub> H <sub>27</sub> B N <sub>2</sub> O <sub>4</sub> S |                |
| Formula weight         | 378.28                                                            |                |
| Temperature            | 296(2) K                                                          |                |
| Wavelength             | 0.71073 Å                                                         |                |
| Crystal system         | Monoclinic                                                        |                |
| Space group            | P2 <sub>1</sub> /c                                                |                |
| Unit cell dimensions   | a = 12.029(3) Å                                                   | α = 90°        |
|                        | b = 14.490(4) Å                                                   | β = 95.143(7)° |
|                        | c = 11.877(3) Å                                                   | γ = 90°        |
| Volume                 | 2061.7(9) Å <sup>3</sup>                                          |                |
| Z                      | 4                                                                 |                |
| Density (calculated)   | 1.219 Mg/m <sup>3</sup>                                           |                |
| Absorption coefficient | 0.181 mm <sup>-1</sup>                                            |                |
| F(000)                 | 808                                                               |                |
| Crystal size           | 0.209 x 0.162 x 0.059 mm <sup>3</sup>                             |                |

|                                   |                                             |
|-----------------------------------|---------------------------------------------|
| Theta range for data collection   | 2.703 to 25.727°.                           |
| Index ranges                      | -14<=h<=14, -17<=k<=17, -12<=l<=14          |
| Reflections collected             | 33518                                       |
| Independent reflections           | 3905 [R(int) = 0.0785]                      |
| Completeness to theta = 25.242°   | 99.4 %                                      |
| Absorption correction             | Semi-empirical from equivalents             |
| Max. and min. transmission        | 0.7453 and 0.6645                           |
| Refinement method                 | Full-matrix least-squares on F <sup>2</sup> |
| Data / restraints / parameters    | 3905 / 765 / 387                            |
| Goodness-of-fit on F <sup>2</sup> | 1.041                                       |
| Final R indices [I>2sigma(I)]     | R1 = 0.0875, wR2 = 0.2466                   |
| R indices (all data)              | R1 = 0.1170, wR2 = 0.2773                   |
| Largest diff. peak and hole       | 0.732 and -0.523 e·Å <sup>-3</sup>          |

**Table S9.** Atomic coordinates ( x 10<sup>4</sup> ) and equivalent isotropic displacement parameters ( Å<sup>2</sup> x 10<sup>3</sup> ) for **R'**. U(eq) is defined as one third of the trace of the orthogonalized U<sup>ij</sup> tensor.

|        | x        | y        | z        | U(eq) |
|--------|----------|----------|----------|-------|
| C(1)   | 11743(5) | 4535(4)  | 4916(6)  | 94(2) |
| C(2)   | 11326(4) | 5479(3)  | 4556(4)  | 65(1) |
| C(3)   | 10816(4) | 5610(3)  | 3463(4)  | 73(1) |
| C(4)   | 10417(4) | 6454(3)  | 3107(4)  | 64(1) |
| C(5)   | 10548(3) | 7210(3)  | 3834(3)  | 50(1) |
| C(6)   | 11043(4) | 7089(3)  | 4910(4)  | 65(1) |
| C(7)   | 11418(4) | 6225(4)  | 5258(4)  | 71(1) |
| S(8)   | 10150(1) | 8310(1)  | 3304(1)  | 58(1) |
| O(9)   | 9261(3)  | 8178(2)  | 2423(3)  | 78(1) |
| O(10)  | 11147(3) | 8743(2)  | 2981(3)  | 76(1) |
| N(11)  | 9865(15) | 8911(16) | 4417(16) | 50(3) |
| C(12)  | 8880(30) | 8800(30) | 4910(20) | 51(2) |
| C(13)  | 8200(10) | 7912(9)  | 4812(9)  | 57(2) |
| C(14)  | 7036(10) | 8025(9)  | 5149(9)  | 68(2) |
| C(15)  | 7161(7)  | 8455(6)  | 6394(8)  | 65(2) |
| C(16)  | 7735(13) | 9390(13) | 6338(13) | 61(2) |
| N(17)  | 8655(17) | 9399(15) | 5657(13) | 52(2) |
| N(11B) | 9697(19) | 8960(20) | 4230(20) | 47(3) |

|        |          |          |          |        |
|--------|----------|----------|----------|--------|
| C(12B) | 8850(40) | 8780(30) | 4780(30) | 51(2)  |
| C(13B) | 8022(14) | 8017(12) | 4504(12) | 57(2)  |
| C(14B) | 7207(13) | 7903(11) | 5516(12) | 66(2)  |
| C(15B) | 6716(9)  | 8821(9)  | 5730(11) | 76(2)  |
| C(16B) | 7566(18) | 9487(17) | 6128(17) | 63(2)  |
| N(17B) | 8560(20) | 9450(20) | 5454(18) | 53(2)  |
| B(18)  | 6023(14) | 8536(13) | 6969(15) | 96(2)  |
| O(19)  | 5713(6)  | 8116(7)  | 7725(8)  | 121(2) |
| O(20)  | 5086(8)  | 9056(8)  | 6365(9)  | 130(2) |
| C(21)  | 4575(10) | 8281(9)  | 7896(11) | 121(2) |
| C(22)  | 4007(16) | 7383(12) | 8038(19) | 170(5) |
| C(23)  | 4600(16) | 8908(13) | 9089(12) | 154(5) |
| C(24)  | 4224(10) | 9030(10) | 7142(11) | 125(2) |
| C(25)  | 4352(15) | 9943(12) | 7672(16) | 162(5) |
| C(26)  | 3109(12) | 9075(15) | 6552(16) | 163(5) |
| B(18B) | 5850(20) | 8704(17) | 6563(18) | 101(2) |
| O(19B) | 5555(9)  | 9333(9)  | 7314(11) | 127(2) |
| O(20B) | 5085(8)  | 8112(9)  | 6473(10) | 121(2) |
| C(21B) | 4577(12) | 9065(11) | 7840(14) | 124(2) |
| C(22B) | 3724(16) | 9881(15) | 7690(20) | 151(5) |
| C(23B) | 4420(20) | 8362(16) | 8974(16) | 142(5) |
| C(24B) | 4139(12) | 8322(11) | 7074(15) | 125(3) |
| C(25B) | 3790(18) | 7391(13) | 7160(20) | 149(5) |
| C(26B) | 3198(15) | 8548(16) | 6247(18) | 145(5) |

**Table S10.** Bond lengths [Å] and angles [°] for **R<sup>4</sup>**.

|            |          |
|------------|----------|
| C(1)-C(2)  | 1.504(7) |
| C(1)-H(1A) | 0.9600   |
| C(1)-H(1B) | 0.9600   |
| C(1)-H(1C) | 0.9600   |
| C(2)-C(7)  | 1.364(7) |
| C(2)-C(3)  | 1.398(7) |
| C(3)-C(4)  | 1.367(7) |
| C(3)-H(3)  | 0.9300   |
| C(4)-C(5)  | 1.395(5) |
| C(4)-H(4)  | 0.9300   |

|               |           |
|---------------|-----------|
| C(5)-C(6)     | 1.372(6)  |
| C(5)-S(8)     | 1.764(4)  |
| C(6)-C(7)     | 1.381(7)  |
| C(6)-H(6)     | 0.9300    |
| C(7)-H(7)     | 0.9300    |
| S(8)-O(10)    | 1.437(3)  |
| S(8)-O(9)     | 1.440(3)  |
| S(8)-N(11B)   | 1.59(3)   |
| S(8)-N(11)    | 1.64(2)   |
| N(11)-C(12)   | 1.38(4)   |
| C(12)-N(17)   | 1.29(3)   |
| C(12)-C(13)   | 1.52(4)   |
| C(13)-C(14)   | 1.50(2)   |
| C(13)-H(13A)  | 0.9700    |
| C(13)-H(13B)  | 0.9700    |
| C(14)-C(15)   | 1.599(15) |
| C(14)-H(14A)  | 0.9700    |
| C(14)-H(14B)  | 0.9700    |
| C(15)-C(16)   | 1.52(2)   |
| C(15)-B(18)   | 1.588(18) |
| C(15)-H(15)   | 0.9800    |
| C(16)-N(17)   | 1.43(2)   |
| C(16)-H(16A)  | 0.9700    |
| C(16)-H(16B)  | 0.9700    |
| N(17)-H(17)   | 0.95(10)  |
| N(11B)-C(12B) | 1.28(5)   |
| C(12B)-N(17B) | 1.33(4)   |
| C(12B)-C(13B) | 1.50(5)   |
| C(13B)-C(14B) | 1.63(2)   |
| C(13B)-H(13C) | 0.9700    |
| C(13B)-H(13D) | 0.9700    |
| C(14B)-C(15B) | 1.49(2)   |
| C(14B)-H(14C) | 0.9700    |
| C(14B)-H(14D) | 0.9700    |
| C(15B)-C(16B) | 1.45(3)   |
| C(15B)-B(18B) | 1.51(2)   |
| C(15B)-H(15B) | 0.9800    |



|               |           |
|---------------|-----------|
| C(16B)-N(17B) | 1.50(3)   |
| C(16B)-H(16C) | 0.9700    |
| C(16B)-H(16D) | 0.9700    |
| N(17B)-H(17B) | 0.69(15)  |
| B(18)-O(19)   | 1.173(17) |
| B(18)-O(20)   | 1.49(2)   |
| O(19)-C(21)   | 1.422(12) |
| O(20)-C(24)   | 1.449(13) |
| C(21)-C(24)   | 1.445(12) |
| C(21)-C(22)   | 1.487(14) |
| C(21)-C(23)   | 1.680(13) |
| C(22)-H(22A)  | 0.9600    |
| C(22)-H(22B)  | 0.9600    |
| C(22)-H(22C)  | 0.9600    |
| C(23)-H(23A)  | 0.9600    |
| C(23)-H(23B)  | 0.9600    |
| C(23)-H(23C)  | 0.9600    |
| C(24)-C(26)   | 1.458(13) |
| C(24)-C(25)   | 1.467(14) |
| C(25)-H(25A)  | 0.9600    |
| C(25)-H(25B)  | 0.9600    |
| C(25)-H(25C)  | 0.9600    |
| C(26)-H(26A)  | 0.9600    |
| C(26)-H(26B)  | 0.9600    |
| C(26)-H(26C)  | 0.9600    |
| B(18B)-O(20B) | 1.25(2)   |
| B(18B)-O(19B) | 1.34(3)   |
| O(19B)-C(21B) | 1.434(14) |
| O(20B)-C(24B) | 1.430(15) |
| C(21B)-C(24B) | 1.476(16) |
| C(21B)-C(22B) | 1.566(19) |
| C(21B)-C(23B) | 1.711(17) |
| C(22B)-H(22D) | 0.9600    |
| C(22B)-H(22E) | 0.9600    |
| C(22B)-H(22F) | 0.9600    |
| C(23B)-H(23D) | 0.9600    |
| C(23B)-H(23E) | 0.9600    |

|                   |           |
|-------------------|-----------|
| C(23B)-H(23F)     | 0.9600    |
| C(24B)-C(25B)     | 1.420(18) |
| C(24B)-C(26B)     | 1.468(17) |
| C(25B)-H(25D)     | 0.9600    |
| C(25B)-H(25E)     | 0.9600    |
| C(25B)-H(25F)     | 0.9600    |
| C(26B)-H(26D)     | 0.9600    |
| C(26B)-H(26E)     | 0.9600    |
| C(26B)-H(26F)     | 0.9600    |
|                   |           |
| C(2)-C(1)-H(1A)   | 109.5     |
| C(2)-C(1)-H(1B)   | 109.5     |
| H(1A)-C(1)-H(1B)  | 109.5     |
| C(2)-C(1)-H(1C)   | 109.5     |
| H(1A)-C(1)-H(1C)  | 109.5     |
| H(1B)-C(1)-H(1C)  | 109.5     |
| C(7)-C(2)-C(3)    | 117.6(4)  |
| C(7)-C(2)-C(1)    | 122.7(5)  |
| C(3)-C(2)-C(1)    | 119.6(5)  |
| C(4)-C(3)-C(2)    | 121.5(4)  |
| C(4)-C(3)-H(3)    | 119.3     |
| C(2)-C(3)-H(3)    | 119.3     |
| C(3)-C(4)-C(5)    | 119.6(4)  |
| C(3)-C(4)-H(4)    | 120.2     |
| C(5)-C(4)-H(4)    | 120.2     |
| C(6)-C(5)-C(4)    | 119.4(4)  |
| C(6)-C(5)-S(8)    | 121.9(3)  |
| C(4)-C(5)-S(8)    | 118.5(3)  |
| C(5)-C(6)-C(7)    | 119.8(4)  |
| C(5)-C(6)-H(6)    | 120.1     |
| C(7)-C(6)-H(6)    | 120.1     |
| C(2)-C(7)-C(6)    | 122.0(4)  |
| C(2)-C(7)-H(7)    | 119.0     |
| C(6)-C(7)-H(7)    | 119.0     |
| O(10)-S(8)-O(9)   | 116.6(2)  |
| O(10)-S(8)-N(11B) | 105.8(10) |
| O(9)-S(8)-N(11B)  | 107.9(8)  |

|                     |            |
|---------------------|------------|
| O(10)-S(8)-N(11)    | 102.9(8)   |
| O(9)-S(8)-N(11)     | 117.4(6)   |
| O(10)-S(8)-C(5)     | 106.45(19) |
| O(9)-S(8)-C(5)      | 107.40(19) |
| N(11B)-S(8)-C(5)    | 112.9(9)   |
| N(11)-S(8)-C(5)     | 105.1(7)   |
| C(12)-N(11)-S(8)    | 121.9(16)  |
| N(17)-C(12)-N(11)   | 117(3)     |
| N(17)-C(12)-C(13)   | 119(2)     |
| N(11)-C(12)-C(13)   | 123(2)     |
| C(14)-C(13)-C(12)   | 113.2(17)  |
| C(14)-C(13)-H(13A)  | 108.9      |
| C(12)-C(13)-H(13A)  | 108.9      |
| C(14)-C(13)-H(13B)  | 108.9      |
| C(12)-C(13)-H(13B)  | 108.9      |
| H(13A)-C(13)-H(13B) | 107.8      |
| C(13)-C(14)-C(15)   | 106.1(9)   |
| C(13)-C(14)-H(14A)  | 110.5      |
| C(15)-C(14)-H(14A)  | 110.5      |
| C(13)-C(14)-H(14B)  | 110.5      |
| C(15)-C(14)-H(14B)  | 110.5      |
| H(14A)-C(14)-H(14B) | 108.7      |
| C(16)-C(15)-B(18)   | 111.4(11)  |
| C(16)-C(15)-C(14)   | 108.2(9)   |
| B(18)-C(15)-C(14)   | 114.4(9)   |
| C(16)-C(15)-H(15)   | 107.6      |
| B(18)-C(15)-H(15)   | 107.6      |
| C(14)-C(15)-H(15)   | 107.6      |
| N(17)-C(16)-C(15)   | 114.2(14)  |
| N(17)-C(16)-H(16A)  | 108.7      |
| C(15)-C(16)-H(16A)  | 108.7      |
| N(17)-C(16)-H(16B)  | 108.7      |
| C(15)-C(16)-H(16B)  | 108.7      |
| H(16A)-C(16)-H(16B) | 107.6      |
| C(12)-N(17)-C(16)   | 127(2)     |
| C(12)-N(17)-H(17)   | 110(6)     |
| C(16)-N(17)-H(17)   | 123(6)     |

|                      |           |
|----------------------|-----------|
| C(12B)-N(11B)-S(8)   | 124(2)    |
| N(11B)-C(12B)-N(17B) | 114(3)    |
| N(11B)-C(12B)-C(13B) | 126(3)    |
| N(17B)-C(12B)-C(13B) | 118(3)    |
| C(12B)-C(13B)-C(14B) | 110.2(17) |
| C(12B)-C(13B)-H(13C) | 109.6     |
| C(14B)-C(13B)-H(13C) | 109.6     |
| C(12B)-C(13B)-H(13D) | 109.6     |
| C(14B)-C(13B)-H(13D) | 109.6     |
| H(13C)-C(13B)-H(13D) | 108.1     |
| C(15B)-C(14B)-C(13B) | 108.0(12) |
| C(15B)-C(14B)-H(14C) | 110.1     |
| C(13B)-C(14B)-H(14C) | 110.1     |
| C(15B)-C(14B)-H(14D) | 110.1     |
| C(13B)-C(14B)-H(14D) | 110.1     |
| H(14C)-C(14B)-H(14D) | 108.4     |
| C(16B)-C(15B)-C(14B) | 111.8(13) |
| C(16B)-C(15B)-B(18B) | 111.6(15) |
| C(14B)-C(15B)-B(18B) | 108.6(14) |
| C(16B)-C(15B)-H(15B) | 108.2     |
| C(14B)-C(15B)-H(15B) | 108.2     |
| B(18B)-C(15B)-H(15B) | 108.2     |
| C(15B)-C(16B)-N(17B) | 112.0(17) |
| C(15B)-C(16B)-H(16C) | 109.2     |
| N(17B)-C(16B)-H(16C) | 109.2     |
| C(15B)-C(16B)-H(16D) | 109.2     |
| N(17B)-C(16B)-H(16D) | 109.2     |
| H(16C)-C(16B)-H(16D) | 107.9     |
| C(12B)-N(17B)-C(16B) | 128(3)    |
| C(12B)-N(17B)-H(17B) | 113(10)   |
| C(16B)-N(17B)-H(17B) | 118(10)   |
| O(19)-B(18)-O(20)    | 110.7(13) |
| O(19)-B(18)-C(15)    | 129.5(14) |
| O(20)-B(18)-C(15)    | 118.4(12) |
| B(18)-O(19)-C(21)    | 113.5(12) |
| C(24)-O(20)-B(18)    | 103.6(10) |
| O(19)-C(21)-C(24)    | 105.6(9)  |

|                      |           |
|----------------------|-----------|
| O(19)-C(21)-C(22)    | 109.1(12) |
| C(24)-C(21)-C(22)    | 128.0(13) |
| O(19)-C(21)-C(23)    | 105.5(11) |
| C(24)-C(21)-C(23)    | 95.7(10)  |
| C(22)-C(21)-C(23)    | 110.5(12) |
| C(21)-C(22)-H(22A)   | 109.5     |
| C(21)-C(22)-H(22B)   | 109.5     |
| H(22A)-C(22)-H(22B)  | 109.5     |
| C(21)-C(22)-H(22C)   | 109.5     |
| H(22A)-C(22)-H(22C)  | 109.5     |
| H(22B)-C(22)-H(22C)  | 109.5     |
| C(21)-C(23)-H(23A)   | 109.5     |
| C(21)-C(23)-H(23B)   | 109.5     |
| H(23A)-C(23)-H(23B)  | 109.5     |
| C(21)-C(23)-H(23C)   | 109.5     |
| H(23A)-C(23)-H(23C)  | 109.5     |
| H(23B)-C(23)-H(23C)  | 109.5     |
| C(21)-C(24)-O(20)    | 103.2(10) |
| C(21)-C(24)-C(26)    | 122.5(13) |
| O(20)-C(24)-C(26)    | 111.8(13) |
| C(21)-C(24)-C(25)    | 113.4(13) |
| O(20)-C(24)-C(25)    | 101.3(11) |
| C(26)-C(24)-C(25)    | 102.9(12) |
| C(24)-C(25)-H(25A)   | 109.5     |
| C(24)-C(25)-H(25B)   | 109.5     |
| H(25A)-C(25)-H(25B)  | 109.5     |
| C(24)-C(25)-H(25C)   | 109.5     |
| H(25A)-C(25)-H(25C)  | 109.5     |
| H(25B)-C(25)-H(25C)  | 109.5     |
| C(24)-C(26)-H(26A)   | 109.5     |
| C(24)-C(26)-H(26B)   | 109.5     |
| H(26A)-C(26)-H(26B)  | 109.5     |
| C(24)-C(26)-H(26C)   | 109.5     |
| H(26A)-C(26)-H(26C)  | 109.5     |
| H(26B)-C(26)-H(26C)  | 109.5     |
| O(20B)-B(18B)-O(19B) | 106.7(17) |
| O(20B)-B(18B)-C(15B) | 124.4(18) |

|                      |           |
|----------------------|-----------|
| O(19B)-B(18B)-C(15B) | 126.5(18) |
| B(18B)-O(19B)-C(21B) | 112.2(14) |
| B(18B)-O(20B)-C(24B) | 114.9(15) |
| O(19B)-C(21B)-C(24B) | 101.0(11) |
| O(19B)-C(21B)-C(22B) | 107.4(13) |
| C(24B)-C(21B)-C(22B) | 106.5(14) |
| O(19B)-C(21B)-C(23B) | 130.9(14) |
| C(24B)-C(21B)-C(23B) | 89.6(12)  |
| C(22B)-C(21B)-C(23B) | 115.2(13) |
| C(21B)-C(22B)-H(22D) | 109.5     |
| C(21B)-C(22B)-H(22E) | 109.5     |
| H(22D)-C(22B)-H(22E) | 109.5     |
| C(21B)-C(22B)-H(22F) | 109.5     |
| H(22D)-C(22B)-H(22F) | 109.5     |
| H(22E)-C(22B)-H(22F) | 109.5     |
| C(21B)-C(23B)-H(23D) | 109.5     |
| C(21B)-C(23B)-H(23E) | 109.5     |
| H(23D)-C(23B)-H(23E) | 109.5     |
| C(21B)-C(23B)-H(23F) | 109.5     |
| H(23D)-C(23B)-H(23F) | 109.5     |
| H(23E)-C(23B)-H(23F) | 109.5     |
| C(25B)-C(24B)-O(20B) | 95.1(13)  |
| C(25B)-C(24B)-C(26B) | 92.7(15)  |
| O(20B)-C(24B)-C(26B) | 108.3(15) |
| C(25B)-C(24B)-C(21B) | 137.6(16) |
| O(20B)-C(24B)-C(21B) | 102.0(11) |
| C(26B)-C(24B)-C(21B) | 117.5(15) |
| C(24B)-C(25B)-H(25D) | 109.5     |
| C(24B)-C(25B)-H(25E) | 109.5     |
| H(25D)-C(25B)-H(25E) | 109.5     |
| C(24B)-C(25B)-H(25F) | 109.5     |
| H(25D)-C(25B)-H(25F) | 109.5     |
| H(25E)-C(25B)-H(25F) | 109.5     |
| C(24B)-C(26B)-H(26D) | 109.5     |
| C(24B)-C(26B)-H(26E) | 109.5     |
| H(26D)-C(26B)-H(26E) | 109.5     |
| C(24B)-C(26B)-H(26F) | 109.5     |

|                      |       |
|----------------------|-------|
| H(26D)-C(26B)-H(26F) | 109.5 |
| H(26E)-C(26B)-H(26F) | 109.5 |

Symmetry transformations used to generate equivalent atoms:

**Table S11.** Anisotropic displacement parameters ( $\text{\AA}^2 \times 10^3$ ) for **R**<sup>4</sup>. The anisotropic displacement factor exponent takes the form:  $-2\pi^2[ h^2 a^{*2} U^{11} + \dots + 2 h k a^* b^* U^{12} ]$

|        | U <sup>11</sup> | U <sup>22</sup> | U <sup>33</sup> | U <sup>23</sup> | U <sup>13</sup> | U <sup>12</sup> |
|--------|-----------------|-----------------|-----------------|-----------------|-----------------|-----------------|
| C(1)   | 96(4)           | 66(3)           | 122(5)          | 23(3)           | 27(3)           | 7(3)            |
| C(2)   | 62(2)           | 52(2)           | 86(3)           | 4(2)            | 31(2)           | -4(2)           |
| C(3)   | 87(3)           | 45(2)           | 89(3)           | -17(2)          | 11(3)           | -9(2)           |
| C(4)   | 71(3)           | 58(2)           | 61(2)           | -16(2)          | 3(2)            | -7(2)           |
| C(5)   | 53(2)           | 48(2)           | 51(2)           | -8(2)           | 17(2)           | -9(2)           |
| C(6)   | 80(3)           | 60(2)           | 55(2)           | -15(2)          | 12(2)           | 2(2)            |
| C(7)   | 79(3)           | 80(3)           | 56(2)           | 5(2)            | 11(2)           | 9(2)            |
| S(8)   | 71(1)           | 48(1)           | 56(1)           | -2(1)           | 18(1)           | -7(1)           |
| O(9)   | 96(2)           | 71(2)           | 64(2)           | 1(2)            | -10(2)          | 2(2)            |
| O(10)  | 97(2)           | 59(2)           | 80(2)           | -2(2)           | 46(2)           | -14(2)          |
| N(11)  | 52(5)           | 44(4)           | 54(5)           | -1(4)           | 10(4)           | -1(4)           |
| C(12)  | 50(3)           | 44(3)           | 59(5)           | 2(4)            | 9(4)            | -2(3)           |
| C(13)  | 55(4)           | 55(4)           | 64(4)           | 0(3)            | 10(3)           | -7(3)           |
| C(14)  | 62(4)           | 67(4)           | 75(4)           | 3(4)            | 8(4)            | -15(3)          |
| C(15)  | 53(3)           | 68(3)           | 76(3)           | 5(3)            | 18(3)           | -5(3)           |
| C(16)  | 52(4)           | 64(4)           | 68(4)           | 1(3)            | 16(3)           | -2(3)           |
| N(17)  | 49(4)           | 50(3)           | 57(5)           | 1(4)            | 10(3)           | -4(3)           |
| N(11B) | 46(5)           | 42(4)           | 53(6)           | 0(4)            | 6(4)            | -5(4)           |
| C(12B) | 51(3)           | 45(3)           | 56(5)           | 0(4)            | 8(4)            | -1(3)           |
| C(13B) | 55(4)           | 52(4)           | 65(5)           | -1(4)           | 9(4)            | -3(3)           |
| C(14B) | 59(4)           | 63(4)           | 75(5)           | 4(4)            | 10(4)           | -9(3)           |
| C(15B) | 64(3)           | 79(4)           | 87(4)           | 0(3)            | 17(3)           | -7(3)           |
| C(16B) | 58(4)           | 63(4)           | 70(5)           | 0(4)            | 15(4)           | -2(4)           |
| N(17B) | 49(4)           | 50(4)           | 62(5)           | -1(4)           | 15(4)           | -5(3)           |
| B(18)  | 77(4)           | 107(4)          | 110(4)          | 2(4)            | 35(4)           | -10(3)          |
| O(19)  | 89(3)           | 149(4)          | 133(4)          | 8(4)            | 53(3)           | 10(3)           |
| O(20)  | 113(4)          | 152(4)          | 132(4)          | 15(4)           | 47(3)           | -8(3)           |

|        |        |         |         |        |       |        |
|--------|--------|---------|---------|--------|-------|--------|
| C(21)  | 98(4)  | 145(4)  | 128(4)  | 9(4)   | 50(4) | 2(4)   |
| C(22)  | 159(8) | 172(9)  | 180(9)  | 8(9)   | 23(8) | -27(8) |
| C(23)  | 142(8) | 189(10) | 133(8)  | -21(8) | 18(7) | 32(9)  |
| C(24)  | 102(4) | 147(4)  | 134(4)  | 3(4)   | 50(4) | 0(4)   |
| C(25)  | 146(8) | 168(9)  | 179(8)  | 5(8)   | 61(8) | -14(8) |
| C(26)  | 138(8) | 181(9)  | 170(9)  | -2(8)  | 16(8) | 10(8)  |
| B(18B) | 80(4)  | 113(4)  | 114(4)  | -8(4)  | 40(4) | -10(4) |
| O(19B) | 103(4) | 144(4)  | 139(4)  | -18(4) | 50(4) | -9(4)  |
| O(20B) | 95(3)  | 138(4)  | 138(4)  | -15(4) | 44(3) | -10(3) |
| C(21B) | 103(4) | 146(4)  | 131(4)  | -2(4)  | 51(4) | -1(4)  |
| C(22B) | 127(9) | 159(9)  | 173(9)  | -2(8)  | 56(8) | -2(8)  |
| C(23B) | 129(8) | 163(10) | 139(8)  | 6(8)   | 34(8) | 17(8)  |
| C(24B) | 102(4) | 145(5)  | 135(4)  | -6(4)  | 45(4) | -10(4) |
| C(25B) | 143(9) | 157(9)  | 151(10) | 4(9)   | 35(9) | -41(8) |
| C(26B) | 116(8) | 163(10) | 155(10) | -25(9) | 3(8)  | -7(9)  |

**Table S12.** Hydrogen coordinates (  $\times 10^4$  ) and isotropic displacement parameters (  $\text{\AA}^2 \times 10^3$  ) for **R'**.

|        | x        | y        | z        | U(eq) |
|--------|----------|----------|----------|-------|
| H(1A)  | 11976    | 4540     | 5710     | 141   |
| H(1B)  | 12364    | 4372     | 4501     | 141   |
| H(1C)  | 11155    | 4092     | 4765     | 141   |
| H(3)   | 10747    | 5112     | 2968     | 88    |
| H(4)   | 10060    | 6523     | 2385     | 76    |
| H(6)   | 11127    | 7588     | 5404     | 78    |
| H(7)   | 11742    | 6150     | 5993     | 86    |
| H(13A) | 8164     | 7694     | 4037     | 69    |
| H(13B) | 8581     | 7444     | 5287     | 69    |
| H(14A) | 6659     | 7434     | 5148     | 81    |
| H(14B) | 6610     | 8436     | 4629     | 81    |
| H(15)  | 7659     | 8050     | 6869     | 78    |
| H(16A) | 7190     | 9842     | 6041     | 73    |
| H(16B) | 7998     | 9579     | 7100     | 73    |
| H(17)  | 9190(70) | 9880(70) | 5690(70) | 62    |
| H(13C) | 8415     | 7443     | 4405     | 69    |



|        |           |           |           |     |
|--------|-----------|-----------|-----------|-----|
| H(13D) | 7579      | 8157      | 3802      | 69  |
| H(14C) | 6619      | 7463      | 5299      | 79  |
| H(14D) | 7629      | 7680      | 6196      | 79  |
| H(15B) | 6342      | 9049      | 5016      | 91  |
| H(16C) | 7804      | 9364      | 6915      | 76  |
| H(16D) | 7248      | 10103     | 6079      | 76  |
| H(17B) | 8840(110) | 9860(100) | 5380(100) | 64  |
| H(22A) | 3238      | 7491      | 8154      | 255 |
| H(22B) | 4050      | 7015      | 7372      | 255 |
| H(22C) | 4364      | 7065      | 8681      | 255 |
| H(23A) | 3849      | 9043      | 9251      | 231 |
| H(23B) | 4970      | 8564      | 9704      | 231 |
| H(23C) | 4994      | 9474      | 8993      | 231 |
| H(25A) | 4106      | 10409     | 7132      | 242 |
| H(25B) | 3911      | 9973      | 8306      | 242 |
| H(25C) | 5123      | 10044     | 7925      | 242 |
| H(26A) | 3044      | 9623      | 6096      | 245 |
| H(26B) | 2986      | 8542      | 6077      | 245 |
| H(26C) | 2563      | 9090      | 7094      | 245 |
| H(22D) | 3057      | 9723      | 8030      | 226 |
| H(22E) | 4048      | 10426     | 8038      | 226 |
| H(22F) | 3543      | 9995      | 6894      | 226 |
| H(23D) | 3649      | 8328      | 9106      | 213 |
| H(23E) | 4692      | 7755      | 8820      | 213 |
| H(23F) | 4843      | 8607      | 9632      | 213 |
| H(25D) | 3130      | 7367      | 7562      | 223 |
| H(25E) | 3632      | 7136      | 6421      | 223 |
| H(25F) | 4374      | 7040      | 7570      | 223 |
| H(26D) | 3242      | 9185      | 6033      | 217 |
| H(26E) | 3227      | 8166      | 5590      | 217 |
| H(26F) | 2509      | 8441      | 6576      | 217 |

**Table S13.** Hydrogen bonds for **R'** [ $\text{\AA}$  and  $^\circ$ ].

| D-H...A               | d(D-H)   | d(H...A) | d(D...A) | $\angle(\text{DHA})$ |
|-----------------------|----------|----------|----------|----------------------|
| N(17)-H(17)...O(10)#1 | 0.95(10) | 2.60(10) | 3.14(2)  | 116(7)               |

|                          |          |          |         |         |
|--------------------------|----------|----------|---------|---------|
| N(17)-H(17)...N(11)#1    | 0.95(10) | 2.10(11) | 3.03(3) | 169(8)  |
| N(17B)-H(17B)...O(10)#1  | 0.69(15) | 2.81(14) | 3.21(3) | 120(13) |
| N(17B)-H(17B)...N(11B)#1 | 0.69(15) | 2.47(14) | 3.11(4) | 157(12) |

---

Symmetry transformations used to generate equivalent atoms:

#1 -x+2,-y+2,-z+1
